# Supplementary material for: Laser capture microdissection-capillary zone electrophoresis-tandem mass spectrometry (LCM-CZE-MS/MS) for spatially resolved top-down proteomics: a pilot study of zebrafish brain
Source: Royal Society of Chemistry journal article supplement (doi:10.1039/d1mo00335f), 2021-12-16
Supplement: d1mo00335f1.xlsx [file d1mo00335f1.xlsx]

## Sheet: note
The proteoforms were identified using the TopPIC software with a 1% proteoform-spectrum match (PrSM) level FDR and a 5% proteoform level FDR.
Label-free quantification for top-down proteomics was performed using the TopDiff tool integrated in the TopPIC platform.
Teo2: the proteoforms identified from the duplicate CZE-MS/MS analyses of the LCM section Teo2. Label-free quantification was performed for the duplicate runs to compare the proteoform intensity across those two runs.
Tel2: the proteoforms identified from the duplicate CZE-MS/MS analyses of the LCM section Tel2. Label-free quantification was performed for the duplicate runs to compare the proteoform intensity across those two runs.

## Sheet: Teo2
Protein accession	Protein description	First residue	Last residue	Proteoform	Precursor mass	Match	Proteoform intensity_teo2_run1	Proteoform intensity_teo2_run2
sp|Q6AZA0|THIL_DANRE	Acetyl-CoA acetyltransferase, mitochondrial OS=Danio rerio OX=7955 GN=acat1 PE=2 SV=1	27	49	Y.STRPSLNEVVIVSAVRTPIGSFK.G	2456.39	Match	3381000	316100
tr|A0A1D5NS25|A0A1D5NS25_DANRE	Troponin T type 3b (skeletal, fast) (Fragment) OS=Danio rerio OX=7955 GN=tnnt3b PE=1 SV=1	47	84	K.KRQNKDLVELQALIDAHFEHRKKEEEELIALKDRIEKR.R	4667.59	Match	40700000	801800
tr|Q6TNV0|Q6TNV0_DANRE	Cytochrome c oxidase subunit 4I1 OS=Danio rerio OX=7955 GN=cox4i1 PE=1 SV=1	149	169	M.RINPVQGFAAKWDYENNAWKK.	2534.3	Match	6691000	1186000
tr|Q8AY63|Q8AY63_DANRE	Creatine kinase OS=Danio rerio OX=7955 GN=ckbb PE=1 SV=1	97	130	R.HGGYKPTDKHKTDLNPDNLKGGDDLDPNYVLSSR.V	3765.86	Match	2119000	1582000
sp|Q5BJA5|H2B1_DANRE	Histone H2B 1/2 OS=Danio rerio OX=7955 GN=zgc:112234 PE=2 SV=3	43	84	K.VLKQVHPDTGISSKAMGIMNSFVNDIFERIAGEASRLAHYNK.R	4643.42	Match	18330000	1876000
sp|Q8JFV8|VAT1_DANRE	Synaptic vesicle membrane protein VAT-1 homolog OS=Danio rerio OX=7955 GN=vat1 PE=2 SV=1	457	484	K.KDEKKKEEAKKDDKKAEEKKEEVKKEEN.	3416.82	Match	2244000	2740000
sp|Q7ZVF9|ACTB2_DANRE	Actin, cytoplasmic 2 OS=Danio rerio OX=7955 GN=actbb PE=1 SV=2	92	118	Y.NELRVAPEEHPVLLTEAPLNPKANREK.M	3063.67	Match	21140000	3329000
tr|Q6ZM17|Q6ZM17_DANRE	Novel protein similar to zebrafish hemoglobin alpha-adult 1 (Hbaa1) OS=Danio rerio OX=7955 GN=si:ch211-5k11.8 PE=1 SV=1	2	37	M.(S)[Acetyl]LSDKDKAVVKAIWAKISPKADEIGAEALARMLTVY.P	3929.16	Match	9039000	3374000
tr|A7MCR1|A7MCR1_DANRE	Cytochrome b-c1 complex subunit Rieske, mitochondrial OS=Danio rerio OX=7955 GN=uqcrfs1 PE=1 SV=1	78	100	F.AHTDIKIPDFSDYRRPEVLNPNK.Q	2724.42	Match	2994000	3663000
sp|Q8JH70|ALDCB_DANRE	Fructose-bisphosphate aldolase C-B OS=Danio rerio OX=7955 GN=aldocb PE=2 SV=1	2	42	M.(T)[Acetyl]HQYPALTAEQKKELQDIAQRIVAPGKGILAADESTGSMAK.R	4406.31	Match	352000000	4264000
sp|Q7ZVF9|ACTB2_DANRE	Actin, cytoplasmic 2 OS=Danio rerio OX=7955 GN=actbb PE=1 SV=2	19	56	K.AGFAGDDAPRAVFPSIVGRPRHQGVMVGMGQKDSYVGD.E	3944.94	Match	2010000	4339000
sp|Q1LYB6|ATF1B_DANRE	ATPase inhibitor B, mitochondrial OS=Danio rerio OX=7955 GN=atp5if1b PE=3 SV=1	70	99	S.ALRRHHQEEIDHHKKEIERLQHEITRHESK.I	3819.02	Match	3860000	4466000
sp|Q8JFV8|VAT1_DANRE	Synaptic vesicle membrane protein VAT-1 homolog OS=Danio rerio OX=7955 GN=vat1 PE=2 SV=1	461	484	K.KKEEAKKDDKKAEEKKEEVKKEEN.	2916.56	Match	3576000	4852000
sp|Q1LYB6|ATF1B_DANRE	ATPase inhibitor B, mitochondrial OS=Danio rerio OX=7955 GN=atp5if1b PE=3 SV=1	72	99	L.RRHHQEEIDHHKKEIERLQHEITRHESK.I	3634.91	Match	4758000	5030000
tr|Q6P271|Q6P271_DANRE	Sodium/potassium-transporting ATPase subunit alpha OS=Danio rerio OX=7955 GN=atp1a3a PE=1 SV=1	163	194	K.NMVPQQALVIREGEKLQINAEEVVGGDLVEVK.G	3503.89	Match	2116000	5348000
sp|Q1LYB6|ATF1B_DANRE	ATPase inhibitor B, mitochondrial OS=Danio rerio OX=7955 GN=atp5if1b PE=3 SV=1	62	98	K.RKEQEQLSALRRHHQEEIDHHKKEIERLQHEITRHES.K	4689.44	Match	3813000	5452000
tr|A0A140LGS2|A0A140LGS2_DANRE	Histone H2A OS=Danio rerio OX=7955 GN=si:ch1073-153i20.5 PE=3 SV=1	38	75	K.GNYAQRVGAGAPVYLAAVLEYLTAEILELAGNAARDNK.K	3961.09	Match	12470000	5460000
tr|E7EXD7|E7EXD7_DANRE	Histone H2A OS=Danio rerio OX=7955 GN=si:ch211-113a14.19 PE=3 SV=1	97	128	K.LLGGVTIAQGGVLPNIQAVLL(PKKTEKAAKGK)[-455.2758].	2756.67	Match	18200000	5658000
tr|Q6DHP2|Q6DHP2_DANRE	Troponin I type 2b (skeletal, fast), tandem duplicate 2 OS=Danio rerio OX=7955 GN=tnni2b.2 PE=1 SV=1	111	133	K.VRMSADSMLQALLGSKHKVSLDL.R	2498.36	Match	5119000	5825000
sp|Q90487|HBA_DANRE	Hemoglobin subunit alpha OS=Danio rerio OX=7955 GN=hbaa1 PE=2 SV=3	2	44	M.(S)[Acetyl]LSDTDKAVVKAIWAKISPKADEIGAEALARMLTVYPQTKTYF.S	4767.56	Match	53540000	6184000
tr|Q7T2P7|Q7T2P7_DANRE	Glutamine synthetase OS=Danio rerio OX=7955 GN=glula PE=1 SV=1	287	319	R.TYDPKGGLDNARRLTGHHETSNIHEFSAGVANR.G	3619.78	Match	6022000	6686000
tr|B8JM34|B8JM34_DANRE	ATP synthase-coupling factor 6, mitochondrial OS=Danio rerio OX=7955 GN=atp5pf PE=1 SV=1	34	56	F.NKAKDMDPIQKLFLDKIRDYNSK.S	2779.49	Match	8487000	7972000
tr|Q7T2P7|Q7T2P7_DANRE	Glutamine synthetase OS=Danio rerio OX=7955 GN=glula PE=1 SV=1	292	319	K.GGLDNARRLTGHHETSNIHEFSAGVANR.G	3015.49	Match	2979000	8118000
sp|Q7ZUY3|H2AX_DANRE	Histone H2AX OS=Danio rerio OX=7955 GN=h2ax PE=2 SV=3	34	78	R.LLRKGNYAERVGAGAPVYLAAVLEYLTAEILELAGNAARDNKKTR.I	4857.7	Match	17610000	8798000
tr|A8WGC6|A8WGC6_DANRE	ATP synthase subunit beta OS=Danio rerio OX=7955 GN=atp5f1b PE=1 SV=1	39	113	Y.AAPAAAAAAASGRIVAVIGAVVDVQFDEGLPPILNALEVAGRDSRLVLEVAQHLGENTVRTIAMDGTEGLVRGQK.V	7584.11	Match	82980000	9227000
sp|Q7ZUY3|H2AX_DANRE	Histone H2AX OS=Danio rerio OX=7955 GN=h2ax PE=2 SV=3	79	104	R.IIPRHLQLAVRNDEELNKLLGGVTIA.Q	2881.67	Match	7714000	9728000
tr|A2BGX6|A2BGX6_DANRE	Myosin heavy chain 4 OS=Danio rerio OX=7955 GN=myhc4 PE=1 SV=1	1898	1923	K.LRKVQHELEEAEERADISESQVNKLR.A	3105.64	Match	13470000	10090000
tr|B0R068|B0R068_DANRE	Sodium/potassium-transporting ATPase subunit alpha OS=Danio rerio OX=7955 GN=atp1a1b PE=1 SV=1	2	25	M.GVGDGRDQYELAATSEQGGKKKNK.N	2535.29	Match	10980000	10150000
tr|A8WGC6|A8WGC6_DANRE	ATP synthase subunit beta OS=Danio rerio OX=7955 GN=atp5f1b PE=1 SV=1	454	481	L.SQPFQVAEVFTGHLGKLVPLKETIKGFK.S	3097.76	Match	10250000	10270000
tr|A0A1D5NS25|A0A1D5NS25_DANRE	Troponin T type 3b (skeletal, fast) (Fragment) OS=Danio rerio OX=7955 GN=tnnt3b PE=1 SV=1	94	128	R.IRAEKDKERQARREEERLRKEEADAKKRADEDAKK.K	4280.31	Match	6387000	10460000
tr|A0A2R8RP85|A0A2R8RP85_DANRE	Synuclein, gamma b (breast cancer-specific protein 1) OS=Danio rerio OX=7955 GN=sncgb PE=1 SV=1	9	34	F.SMAKEGVVAAAEKTKAGVEEAALKTK.E	2616.43	Match	11960000	10680000
tr|A0A2R8RP85|A0A2R8RP85_DANRE	Synuclein, gamma b (breast cancer-specific protein 1) OS=Danio rerio OX=7955 GN=sncgb PE=1 SV=1	7	32	K.GFSMAKEGVVAAAEKTKAGVEEAALK.T	2591.38	Match	11370000	10770000
sp|Q7ZUY3|H2AX_DANRE	Histone H2AX OS=Danio rerio OX=7955 GN=h2ax PE=2 SV=3	44	82	R.VGAGAPVYLAAVLEYLTAEILELAGNAARDNKKTRIIPR.H	4136.34	Match	20620000	10820000
tr|E9QDI4|E9QDI4_DANRE	Troponin T type 3b (skeletal, fast) (Fragment) OS=Danio rerio OX=7955 GN=tnnt3b PE=1 SV=2	163	203	R.RKPLNIDHMNEDKLREKAKEL(W)[16.0071]DWLYSLEAEKFEHMEKLKR.Q	5211.71	Match	12850000	10890000
tr|A8WGC6|A8WGC6_DANRE	ATP synthase subunit beta OS=Danio rerio OX=7955 GN=atp5f1b PE=1 SV=1	151	187	K.QTAPIHAEAPEFTDMSVEQEILVTGIKVVDLLAPYAK.G	4023.13	Match	2333000	11240000
tr|Q803Q7|Q803Q7_DANRE	Fructose-bisphosphate aldolase OS=Danio rerio OX=7955 GN=aldoaa PE=1 SV=1	2	42	M.PHAYPFLTPEQKKELSDIAQRIVAPGKGILAADESTGSVAK.R	4332.34	Match	134500000	11360000
tr|Q6DHP2|Q6DHP2_DANRE	Troponin I type 2b (skeletal, fast), tandem duplicate 2 OS=Danio rerio OX=7955 GN=tnni2b.2 PE=1 SV=1	143	169	K.EVKEEDKEAVGDWRKNIEDKAGMGGRK.K	3073.55	Match	12060000	11530000
tr|A0A2R8Q2N5|A0A2R8Q2N5_DANRE	Myosin, heavy polypeptide 1.2, skeletal muscle OS=Danio rerio OX=7955 GN=myhz1.2 PE=3 SV=1	1484	1503	K.MKNSYEETLDQLETLKRENK.N	2468.24	Match	12820000	11750000
tr|Q6NYV3|Q6NYV3_DANRE	H1.0 linker histone OS=Danio rerio OX=7955 GN=h1-0 PE=1 SV=1	22	45	G.TSHPKYSEMIKAAIAADRSRGGAS.R	2503.28	Match	11290000	11900000
tr|A2BGX6|A2BGX6_DANRE	Myosin heavy chain 4 OS=Danio rerio OX=7955 GN=myhc4 PE=1 SV=1	1898	1922	K.LRKVQHELEEAEERADISESQVNKL.R	2949.54	Match	14140000	11900000
sp|Q5BJA5|H2B1_DANRE	Histone H2B 1/2 OS=Danio rerio OX=7955 GN=zgc:112234 PE=2 SV=3	97	120	A.VRLLLPGELAKHAVSEGTKAVTKY.T	2579.5	Match	12380000	11960000
sp|Q8JH70|ALDCB_DANRE	Fructose-bisphosphate aldolase C-B OS=Danio rerio OX=7955 GN=aldocb PE=2 SV=1	2	22	M.(T)[Acetyl]HQYPALTAEQKKELQDIAQR.I	2509.31	Match	1699000	11990000
sp|Q5BJA5|H2B1_DANRE	Histone H2B 1/2 OS=Danio rerio OX=7955 GN=zgc:112234 PE=2 SV=3	99	123	R.LLLPGELAKHAVSEGTKAVTKYTSS.K	2599.44	Match	10580000	13800000
sp|Q7ZUY3|H2AX_DANRE	Histone H2AX OS=Danio rerio OX=7955 GN=h2ax PE=2 SV=3	37	82	R.KGNYAERVGAGAPVYLAAVLEYLTAEILELAGNAARDNKKTRIIPR.H	4954.76	Match	24340000	13820000
sp|Q5BJA5|H2B1_DANRE	Histone H2B 1/2 OS=Danio rerio OX=7955 GN=zgc:112234 PE=2 SV=3	99	124	R.LLLPGELAKHAVSEGTKAVTKYTSSK.	2727.54	Match	19100000	14480000
tr|Q803Q7|Q803Q7_DANRE	Fructose-bisphosphate aldolase OS=Danio rerio OX=7955 GN=aldoaa PE=1 SV=1	2	43	M.PHAYPFLTPEQKKELSDIAQRIVAPGKGILAADESTGSVAKR.F	4488.45	Match	16620000	14830000
tr|A2BGX6|A2BGX6_DANRE	Myosin heavy chain 4 OS=Danio rerio OX=7955 GN=myhc4 PE=1 SV=1	1898	1924	K.LRKVQHELEEAEERADISESQVNKLRA.K	3176.68	Match	15470000	14990000
tr|A7MBY4|A7MBY4_DANRE	Histone H2B OS=Danio rerio OX=7955 GN=zgc:171759 PE=1 SV=1	1	28	.(M)[87.0390]GIMNSFVNDIFERIAGEASRLAHYNKR.S	3325.67	Match	13000000	15280000
tr|Q6DHP2|Q6DHP2_DANRE	Troponin I type 2b (skeletal, fast), tandem duplicate 2 OS=Danio rerio OX=7955 GN=tnni2b.2 PE=1 SV=1	143	170	K.EVKEEDKEAVGDWRKNIEDKAGMGGRKK.M	3201.64	Match	17020000	16060000
sp|Q5BJA5|H2B1_DANRE	Histone H2B 1/2 OS=Danio rerio OX=7955 GN=zgc:112234 PE=2 SV=3	85	115	K.RSTITSREIQTAVRLLLPGELAKHAVSEGTK.A	3360.91	Match	15820000	17100000
tr|Q5XJK2|Q5XJK2_DANRE	Histone H2A OS=Danio rerio OX=7955 GN=h2ax1 PE=2 SV=1	37	76	R.KGNYAERVGAGAPVY(L)[15.1538]AAVLEYLTAEILELAGNAARDNKK.T	4233.27	Match	22350000	17410000
tr|Q1LVG7|Q1LVG7_DANRE	ATP synthase F1 subunit delta OS=Danio rerio OX=7955 GN=atp5f1d PE=1 SV=1	123	159	K.ANLEKAQSELVGASDEATRAEVLISIEANEAIVKALE.	3881.06	Match	1600000	17620000
sp|Q7ZUY3|H2AX_DANRE	Histone H2AX OS=Danio rerio OX=7955 GN=h2ax PE=2 SV=3	38	78	K.GNYAERVGAGAPVYLAAVLEYLTAEILELAGNAARDNKKTR.I	4346.32	Match	21910000	17710000
tr|Q6TNV0|Q6TNV0_DANRE	Cytochrome c oxidase subunit 4I1 OS=Danio rerio OX=7955 GN=cox4i1 PE=1 SV=1	24	55	G.AHGVAKVEDYSLPAYFDRRESPLPEIKFVQQL.S	3701.95	Match	17460000	18240000
sp|Q71PD7|H2AV_DANRE	Histone H2A.V OS=Danio rerio OX=7955 GN=h2az2a PE=2 SV=3	39	78	K.TRTTSHGRVGATAAVYSAAILEYLTAEVLELAGNASKDLK.V	4147.22	Match	17290000	18750000
tr|A0A0R4IKF0|A0A0R4IKF0_DANRE	Apolipoprotein A-Ib OS=Danio rerio OX=7955 GN=apoa1b PE=1 SV=1	221	257	R.EKVKSGELRKELTELGEQVKPHFEGIFKALQKFASKE.	4257.34	Match	18930000	19090000
tr|Q7ZUB0|Q7ZUB0_DANRE	Atrial myosin light chain OS=Danio rerio OX=7955 GN=myl13 PE=1 SV=1	2	31	M.(APKKKEE)[42.0552]PKPAAAPKPPEPEPPKEPEFNAA.E	3260.76	Match	19080000	19150000
sp|Q71PD7|H2AV_DANRE	Histone H2A.V OS=Danio rerio OX=7955 GN=h2az2a PE=2 SV=3	86	116	R.HLQLAIRGDEELDSLIKATIAGGGVIPHIHK.S	3300.86	Match	16110000	19380000
tr|F1R4C8|F1R4C8_DANRE	Complex I-30kD OS=Danio rerio OX=7955 GN=ndufs3 PE=1 SV=1	225	255	R.KFDLNSPWEAFPAYREPKEAPKLESGDKSEK.	3592.82	Match	17700000	20120000
sp|Q7ZUY3|H2AX_DANRE	Histone H2AX OS=Danio rerio OX=7955 GN=h2ax PE=2 SV=3	36	75	L.RKGNYAERVGAGAPVYLAAVLEYLTAEILELAGNAARDNK.K	4246.28	Match	96200000	20150000
tr|F8W4L9|F8W4L9_DANRE	Fatty acid-binding protein 7, brain, a (Fragment) OS=Danio rerio OX=7955 GN=fabp7a PE=1 SV=1	68	117	K.STVSLEGDNLVQVQRWDGKETKFVREIKDGKMVMTLTFEGVQAVRTYEKA.	5714.99	Match	30970000	20890000
tr|Q6ZM17|Q6ZM17_DANRE	Novel protein similar to zebrafish hemoglobin alpha-adult 1 (Hbaa1) OS=Danio rerio OX=7955 GN=si:ch211-5k11.8 PE=1 SV=1	2	34	M.(S)[Acetyl]LSDKDKAVVKAIWAKISPKADEIGAEALAR(M)[16.0000]L.T	3581.97	Match	15810000	21190000
sp|Q5BJA5|H2B1_DANRE	Histone H2B 1/2 OS=Danio rerio OX=7955 GN=zgc:112234 PE=2 SV=3	85	120	K.RSTITSREIQTAVRLLLPGELAKHAVSEGTKAVTKY.T	3923.22	Match	15020000	21430000
sp|Q8JH70|ALDCB_DANRE	Fructose-bisphosphate aldolase C-B OS=Danio rerio OX=7955 GN=aldocb PE=2 SV=1	2	33	M.(T)[Acetyl]HQYPALTAEQKKELQDIAQRIVAPGKGILAA.D	3499.93	Match	22340000	22400000
sp|Q8JH70|ALDCB_DANRE	Fructose-bisphosphate aldolase C-B OS=Danio rerio OX=7955 GN=aldocb PE=2 SV=1	2	32	M.(T)[Acetyl]HQYPALTAEQKKELQDIAQRIVAPGKGILA.A	3428.9	Match	35420000	23010000
sp|Q7ZUY3|H2AX_DANRE	Histone H2AX OS=Danio rerio OX=7955 GN=h2ax PE=2 SV=3	79	105	R.IIPRHLQLAVRNDEELNKLLGGVTIAQ.G	3009.73	Match	22750000	24570000
sp|Q5BJA5|H2B1_DANRE	Histone H2B 1/2 OS=Danio rerio OX=7955 GN=zgc:112234 PE=2 SV=3	43	85	K.VLKQVHPDTGISSKAMGIMNSFVNDIFERIAGEASRLAHYNKR.S	4799.51	Match	40920000	25380000
sp|Q7ZUY3|H2AX_DANRE	Histone H2AX OS=Danio rerio OX=7955 GN=h2ax PE=2 SV=3	77	103	K.TRIIPRHLQLAVRNDEELNKLLGGVTI.A	3067.79	Match	23710000	25590000
tr|A0A0R4IJU5|A0A0R4IJU5_DANRE	Synapsin IIb OS=Danio rerio OX=7955 GN=syn2b PE=1 SV=1	436	464	K.ESLPEPIKTPGQRPPPQGGAVKPQEPQPK.S	3086.67	Match	47080000	26510000
sp|Q5BJA5|H2B1_DANRE	Histone H2B 1/2 OS=Danio rerio OX=7955 GN=zgc:112234 PE=2 SV=3	86	112	R.STITSREIQTAVRLLLPGELAKHAVSE.G	2918.64	Match	26470000	27380000
tr|Q6DHP2|Q6DHP2_DANRE	Troponin I type 2b (skeletal, fast), tandem duplicate 2 OS=Danio rerio OX=7955 GN=tnni2b.2 PE=1 SV=1	82	110	K.VAKSDKEIEDLKIKVQDLIGKFKKPALKK.V	3309	Match	24360000	28320000
sp|Q58EE9|GFAP_DANRE	Glial fibrillary acidic protein OS=Danio rerio OX=7955 GN=gfap PE=1 SV=2	419	444	R.SIVVRTVETRDGEIIKESTTERKDLP.	2970.62	Match	16170000	28960000
sp|Q5BJA5|H2B1_DANRE	Histone H2B 1/2 OS=Danio rerio OX=7955 GN=zgc:112234 PE=2 SV=3	86	119	R.STITSREIQTAVRLLLPGELAKHAVSEGTKAVTK.Y	3604.06	Match	2198000	29460000
sp|Q90487|HBA_DANRE	Hemoglobin subunit alpha OS=Danio rerio OX=7955 GN=hbaa1 PE=2 SV=3	13	41	K.AIWAKISPKADEIGAEALARMLTVYPQTK.T	3170.73	Match	35220000	29820000
sp|Q7ZUY3|H2AX_DANRE	Histone H2AX OS=Danio rerio OX=7955 GN=h2ax PE=2 SV=3	79	103	R.IIPRHLQLAVRNDEELNKLLGGVTI.A	2810.63	Match	28120000	30010000
sp|Q7ZUY3|H2AX_DANRE	Histone H2AX OS=Danio rerio OX=7955 GN=h2ax PE=2 SV=3	83	119	R.HLQLAVRNDEELNKLLGGVTIAQGGVLPNIQAVLLPK.K	3930.27	Match	54220000	30270000
tr|A0A1D5NS25|A0A1D5NS25_DANRE	Troponin T type 3b (skeletal, fast) (Fragment) OS=Danio rerio OX=7955 GN=tnnt3b PE=1 SV=1	86	129	R.SERAEQQRIRAEKDKERQARREEERLRKEEADAKKRADEDAKKK.S	5392.89	Match	29130000	30350000
tr|B8JM34|B8JM34_DANRE	ATP synthase-coupling factor 6, mitochondrial OS=Danio rerio OX=7955 GN=atp5pf PE=1 SV=1	34	65	F.(N)[1.0025]KAKDMDPIQKLFLDKIRDYNSKSKASGGVVD.A	3580.88	Match	35450000	30450000
tr|A0A0N4STS4|A0A0N4STS4_DANRE	Ubiquitin B OS=Danio rerio OX=7955 GN=ubb PE=4 SV=1	1	75	.MQIFVKTLTGKTITLEVEPSDTIENVKAKIQDKEGIPPDQQRLIFAGKQLEDGRTLSDYNIQKESTLHLVLRLRG.G	8502.65	Match	30320000	30480000
sp|Q7ZVF9|ACTB2_DANRE	Actin, cytoplasmic 2 OS=Danio rerio OX=7955 GN=actbb PE=1 SV=2	19	45	K.AGFAGDDAPRAVFPSIVGRPRHQGVMV.G	2806.47	Match	28960000	31830000
tr|A0A1D5NS25|A0A1D5NS25_DANRE	Troponin T type 3b (skeletal, fast) (Fragment) OS=Danio rerio OX=7955 GN=tnnt3b PE=1 SV=1	47	83	K.KRQNKDLVELQALIDAHFEHRKKEEEELIALKDRIEK.R	4511.49	Match	27640000	33010000
tr|F6NIF4|F6NIF4_DANRE	Creatine kinase (Fragment) OS=Danio rerio OX=7955 GN=ckbb PE=1 SV=1	15	39	Y.SAEQEYPDLTKHNNHMAKVLTPEMY.A	2945.39	Match	28550000	33650000
tr|Q6PBR5|Q6PBR5_DANRE	V-type proton ATPase subunit G OS=Danio rerio OX=7955 GN=atp6v1g1 PE=1 SV=1	57	80	K.TKEAAALGSHGNSAVEVDKETVDK.M	2455.24	Match	18040000	34370000
tr|F8W4C1|F8W4C1_DANRE	Myelin basic protein OS=Danio rerio OX=7955 GN=mbpb PE=1 SV=1	59	80	R.RRPDENAVMHFLRTIVSPSTPK.S	2550.37	Match	32470000	35390000
sp|Q8JH70|ALDCB_DANRE	Fructose-bisphosphate aldolase C-B OS=Danio rerio OX=7955 GN=aldocb PE=2 SV=1	2	60	M.(T)[Acetyl]HQYPAL(T)[-0.9822]AEQKKELQDIAQRIVAPGKGILAADESTGSMAKRLNPIGVENTEENRRLYR.Q	6615.51	Match	43520000	37740000
tr|A3KPR4|A3KPR4_DANRE	Histone H4 OS=Danio rerio OX=7955 GN=hist1h4l PE=2 SV=1	25	103	R.DNIQGITKPAIRRLARRGGVKRISGLIYEETRGVLKVFLENVIRDAVTYTEHAKRKTVTAMDVVYALKRQGRTLYGFGG.	8887.99	Match	17940000	37780000
tr|Q803T6|Q803T6_DANRE	SH3 domain-containing GRB2-like 2a, endophilin A1 OS=Danio rerio OX=7955 GN=sh3gl2a PE=1 SV=1	77	99	K.IRGGDKGPGYTQTETTLGEAMQK.A	2437.2	Match	18250000	37980000
tr|A0A1D5NSI6|A0A1D5NSI6_DANRE	Troponin T type 3b (skeletal, fast) OS=Danio rerio OX=7955 GN=tnnt3b PE=1 SV=1	169	218	R.RKPLNIDHMNEDKLREKAKELWDWLYSLEAEKFEHMEKLKRQKYEVTTQR.K	6329.3	Match	53880000	38450000
sp|Q7ZUY3|H2AX_DANRE	Histone H2AX OS=Danio rerio OX=7955 GN=h2ax PE=2 SV=3	77	113	K.TRIIPRHLQLAVRNDEELNKLLGGVTIAQGGVLPNIQ.A	4045.31	Match	34620000	38580000
tr|A7MBY4|A7MBY4_DANRE	Histone H2B OS=Danio rerio OX=7955 GN=zgc:171759 PE=1 SV=1	1	27	.((M)[Acetyl]GI)[45.0230]MNSFVNDIFERIAGEASRLAHYNK.R	3169.57	Match	35900000	39610000
sp|Q7ZUY3|H2AX_DANRE	Histone H2AX OS=Danio rerio OX=7955 GN=h2ax PE=2 SV=3	79	114	R.IIPRHLQLAVRNDEELNKLLGGVTIAQGGVLPNIQA.V	3859.21	Match	71040000	40030000
sp|Q5BJA5|H2B1_DANRE	Histone H2B 1/2 OS=Danio rerio OX=7955 GN=zgc:112234 PE=2 SV=3	57	85	K.AMGIMNSFVNDIFERIAGEASRLAHYNKR.S	3309.68	Match	2654000	40860000
sp|Q8JFV8|VAT1_DANRE	Synaptic vesicle membrane protein VAT-1 homolog OS=Danio rerio OX=7955 GN=vat1 PE=2 SV=1	447	484	K.KKDEAKKEEKKDEKKKEEAKKDDKKAEEKKEEVKKEEN.	4630.5	Match	36080000	41920000
sp|Q90487|HBA_DANRE	Hemoglobin subunit alpha OS=Danio rerio OX=7955 GN=hbaa1 PE=2 SV=3	18	41	K.ISPKADEIGAEALARMLTVYPQTK.T	2601.4	Match	10920000	42060000
tr|A0A1D5NS25|A0A1D5NS25_DANRE	Troponin T type 3b (skeletal, fast) (Fragment) OS=Danio rerio OX=7955 GN=tnnt3b PE=1 SV=1	169	209	R.RKPLNIDHMNEDKLREKAKELWDWLYSLEAEKFEHMEKLKR.Q	5195.72	Match	43780000	42140000
sp|Q8JH70|ALDCB_DANRE	Fructose-bisphosphate aldolase C-B OS=Danio rerio OX=7955 GN=aldocb PE=2 SV=1	2	43	M.(T)[Acetyl]HQYPALTAEQKKELQDIAQRIVAPGKGILAADESTGSMAKR.L	4562.43	Match	46200000	42540000
tr|F6NUZ4|F6NUZ4_DANRE	Enolase 2 OS=Danio rerio OX=7955 GN=eno2 PE=1 SV=1	2	32	M.(S)[Acetyl]VVSIIAREILDSRGNPTVEVDLRTDKGLFR.A	3496.91	Match	15000000	42990000
sp|B3DFW5|STMP1_DANRE	Short transmembrane mitochondrial protein 1 OS=Danio rerio OX=7955 GN=stmp1 PE=2 SV=1	1	46	.MMQFILGFTLGNVVGMYLAQNYEVPNISKKIEAFKKDVEAKKKPPE.	5242.8	Match	48720000	44890000
tr|Q6PC77|Q6PC77_DANRE	ATP synthase subunit d, mitochondrial OS=Danio rerio OX=7955 GN=atp5pd PE=1 SV=1	100	147	K.SAAAYLEASKARIAEYEKELEKFRNMIPFDQMTIEDLNNTFPETKLDK.Q	5607.83	Match	19500000	45220000
sp|Q7ZUY3|H2AX_DANRE	Histone H2AX OS=Danio rerio OX=7955 GN=h2ax PE=2 SV=3	37	76	R.KGNYAERVGAGAPVYLAAVLEYLTAEILELAGNAARDNKK.T	4218.27	Match	776000000	48480000
sp|Q5BJA5|H2B1_DANRE	Histone H2B 1/2 OS=Danio rerio OX=7955 GN=zgc:112234 PE=2 SV=3	86	122	R.STITSREIQTAVRLLLPGELAKHAVSEGTKAVTKYTS.S	3955.2	Match	48020000	48600000
tr|A0A140LGS2|A0A140LGS2_DANRE	Histone H2A OS=Danio rerio OX=7955 GN=si:ch1073-153i20.5 PE=3 SV=1	41	76	Y.AQRVGAGAPVYLAAVLEYLTAEILELAGNAARDNKK.T	3755.05	Match	4529000	49800000
tr|A0A1D5NS25|A0A1D5NS25_DANRE	Troponin T type 3b (skeletal, fast) (Fragment) OS=Danio rerio OX=7955 GN=tnnt3b PE=1 SV=1	48	83	K.RQNKDLVELQALIDAHFEHRKKEEEELIALKDRIEK.R	4383.4	Match	48600000	53000000
tr|I3IS20|I3IS20_DANRE	Cytochrome b-c1 complex subunit 7 OS=Danio rerio OX=7955 GN=uqcrb PE=1 SV=1	41	79	K.HQILPKDQWTKFEQDVKYLEPYLQEVIRERKEKEEWDKK.	5028.65	Match	70150000	56210000
tr|A0A140LGS2|A0A140LGS2_DANRE	Histone H2A OS=Danio rerio OX=7955 GN=si:ch1073-153i20.5 PE=3 SV=1	37	76	R.KGNYAQRVGAGAPVYLAAVLEYLTAEILELAGNAARDNKK.T	4217.28	Match	107900000	56330000
sp|Q5BJA5|H2B1_DANRE	Histone H2B 1/2 OS=Danio rerio OX=7955 GN=zgc:112234 PE=2 SV=3	31	85	R.TRKESYAIYVYKVLKQVHPDTGISSKAMGIMNSFVNDIFERIAGEASRLAHYNKR.S	6301.31	Match	38700000	56930000
tr|A0A0R4IKF0|A0A0R4IKF0_DANRE	Apolipoprotein A-Ib OS=Danio rerio OX=7955 GN=apoa1b PE=1 SV=1	223	257	K.VKSGELRKELTELGEQVKPHFEGIFKALQKFASKE.	4000.21	Match	41660000	56960000
tr|Q6TNV0|Q6TNV0_DANRE	Cytochrome c oxidase subunit 4I1 OS=Danio rerio OX=7955 GN=cox4i1 PE=1 SV=1	24	60	G.AHGVAKVEDYSLPAYFDRRESPLPEIKFVQQLSADQK.S	4231.2	Match	63530000	57400000
sp|Q7ZUY3|H2AX_DANRE	Histone H2AX OS=Danio rerio OX=7955 GN=h2ax PE=2 SV=3	79	113	R.IIPRHLQLAVRNDEELNKLLGGVTIAQGGVLPNIQ.A	3788.17	Match	70940000	59880000
tr|A2BGX6|A2BGX6_DANRE	Myosin heavy chain 4 OS=Danio rerio OX=7955 GN=myhc4 PE=1 SV=1	1898	1925	K.LRKVQHELEEAEERADISESQVNKLRAK.S	3304.77	Match	55050000	60780000
tr|A2BGX6|A2BGX6_DANRE	Myosin heavy chain 4 OS=Danio rerio OX=7955 GN=myhc4 PE=1 SV=1	1898	1921	K.LRKVQHELEEAEERADISESQVNK.L	2836.46	Match	57920000	63810000
tr|Q7ZUI4|Q7ZUI4_DANRE	Thioredoxin OS=Danio rerio OX=7955 GN=zgc:56493 PE=1 SV=1	1	108	.MIVVIEDQDGFDKALAGAGDKLVVVD(FTATWCGPCQSIAPFYKGLSENPDYSNVVFLKVDVDDAQDVAQSCEIKCMPTFHFYK)[-4.0192]NGKKLDDFSGSNQTKLEEMVKQHKN.	12002.8	Match	29320000	65880000
sp|Q7ZVF9|ACTB2_DANRE	Actin, cytoplasmic 2 OS=Danio rerio OX=7955 GN=actbb PE=1 SV=2	19	61	K.AGFAGDDA(PRAVFPSIVGRPRHQGVMVGMGQK)[16.0136]DSYVGDEAQSK.R	4503.2	Match	52420000	67940000
sp|Q7ZUY3|H2AX_DANRE	Histone H2AX OS=Danio rerio OX=7955 GN=h2ax PE=2 SV=3	83	114	R.HLQLAVRNDEELNKLLGGVTIAQGGVLPNIQA.V	3379.89	Match	35510000	68710000
sp|Q7ZUY3|H2AX_DANRE	Histone H2AX OS=Danio rerio OX=7955 GN=h2ax PE=2 SV=3	83	113	R.HLQLAVRNDEELNKLLGGVTIAQGGVLPNIQ.A	3308.84	Match	30410000	70640000
sp|Q90487|HBA_DANRE	Hemoglobin subunit alpha OS=Danio rerio OX=7955 GN=hbaa1 PE=2 SV=3	60	92	K.HG(KTIMGAV)[16.0046]GEAISKIDDLVGGLAALSELHAFK.L	3363.81	Match	56130000	71750000
sp|Q8JH70|ALDCB_DANRE	Fructose-bisphosphate aldolase C-B OS=Danio rerio OX=7955 GN=aldocb PE=2 SV=1	2	59	M.(T)[Acetyl]HQYPALTAEQKKELQDIAQRIVAPGKGILAADESTGSMAKRLNPIGVENTEENRRLY.R	6460.4	Match	89280000	72140000
sp|Q7ZVF9|ACTB2_DANRE	Actin, cytoplasmic 2 OS=Danio rerio OX=7955 GN=actbb PE=1 SV=2	19	41	K.AGFAGDDAPRAVFPSIVGRPRHQ.G	2420.26	Match	84720000	76320000
tr|A0A0R4IEZ2|A0A0R4IEZ2_DANRE	Actin alpha cardiac muscle 1a OS=Danio rerio OX=7955 GN=actc1a PE=1 SV=1	62	113	K.RGILTLKYPIEHGIITNWDDMEKIWHHTFYNELRVAPEEHPVLLTEAPLNPK.A	6173.25	Match	99730000	77930000
tr|Q6ZM17|Q6ZM17_DANRE	Novel protein similar to zebrafish hemoglobin alpha-adult 1 (Hbaa1) OS=Danio rerio OX=7955 GN=si:ch211-5k11.8 PE=1 SV=1	2	34	M.(S)[Acetyl]LSDKDKAVVKAIWAKISPKADEIGAEALARML.T	3565.98	Match	67860000	80920000
tr|A0A140LGS2|A0A140LGS2_DANRE	Histone H2A OS=Danio rerio OX=7955 GN=si:ch1073-153i20.5 PE=3 SV=1	2	114	M.(S)[Acetyl]GRGKTGGKARAKAKSRSSRAGLQFPVGRVHRLLRKGNYAQRVGAGAPVYLAAVLEYLTAEILELAGNAARDNKKTRIIPRHLQLAVRNDEELNKLLGGVTIAQGGVLPNIQA.V	12084.8	Match	70210000	81310000
tr|F1Q9A4|F1Q9A4_DANRE	Cytochrome c oxidase subunit 7A2a OS=Danio rerio OX=7955 GN=cox7a2a PE=1 SV=1	24	83	Q.LENKVPNKQKLFQEDNDLPVHLKGGLTDGLLYRLTMALTIFGSGYVVYTLFDAAMPKKKD.	6752.63	Match	102200000	90510000
tr|A0A0N4STS4|A0A0N4STS4_DANRE	Ubiquitin B OS=Danio rerio OX=7955 GN=ubb PE=4 SV=1	1	73	.MQIFVKTLTGKTITLEVEPSDTIENVKAKIQDKEGIPPDQQRLIFAGKQLEDGRTLSDYNIQKESTLHLVLRL.R	8289.52	Match	95640000	95440000
sp|Q1LYB6|ATF1B_DANRE	ATPase inhibitor B, mitochondrial OS=Danio rerio OX=7955 GN=atp5if1b PE=3 SV=1	62	99	K.RKEQEQLSALRRHHQEEIDHHKKEIERLQHEITRHESK.I	4817.55	Match	73770000	96100000
tr|Q568Q7|Q568Q7_DANRE	Stathmin OS=Danio rerio OX=7955 GN=stmn1b PE=1 SV=1	2	45	M.(A)[Acetyl]SSGADIQVKELDKRASGQAFEVILSPTAPDAKGEFPLSTPKKK.E	4653.51	Match	37070000	96490000
tr|Q8UVG7|Q8UVG7_DANRE	Fatty acid-binding protein 3, muscle and heart OS=Danio rerio OX=7955 GN=fabp3 PE=1 SV=1	2	133	M.(A)[Acetyl]DAFIGTWNLKESKNFDEYMKGIGVGFATRQVANMTKPTTIISKEGDVFTLKTVSTFKSTEINFKLGEEFDETTADDRKVKSVITLDGGKLLHVQKWDGKETTLLREVSDNNLTLTLTLGDIVSTRHYVKAE.	14783.8	Match	149200000	97690000
sp|Q5BJA5|H2B1_DANRE	Histone H2B 1/2 OS=Danio rerio OX=7955 GN=zgc:112234 PE=2 SV=3	86	123	R.STITSREIQTAVRLLLPGELAKHAVSEGTKAVTKYTSS.K	4042.23	Match	96220000	100800000
sp|Q7ZUY3|H2AX_DANRE	Histone H2AX OS=Danio rerio OX=7955 GN=h2ax PE=2 SV=3	34	75	R.LLRKGNYAERVGAGAPVYLAAVLEYLTAEILELAGNAARDNK.K	4472.44	Match	16890000	101000000
tr|A0A1D5NS25|A0A1D5NS25_DANRE	Troponin T type 3b (skeletal, fast) (Fragment) OS=Danio rerio OX=7955 GN=tnnt3b PE=1 SV=1	48	84	K.RQNKDLVELQALIDAHFEHRKKEEEELIALKDRIEKR.R	4539.5	Match	87690000	107100000
tr|Q9I8U7|Q9I8U7_DANRE	Fast skeletal muscle myosin light polypeptide 3 OS=Danio rerio OX=7955 GN=mylz3 PE=1 SV=1	77	151	K.TVDANQKGTYDDYVEGLRVFDKEGNGTVMGAELRIVLSTLGEKMSEPEIDALMQGQEDENGMVHYEAFVKNIMSV.	8309.99	Match	143500000	110300000
tr|Q9I8U7|Q9I8U7_DANRE	Fast skeletal muscle myosin light polypeptide 3 OS=Danio rerio OX=7955 GN=mylz3 PE=1 SV=1	2	47	M.(A)[Acetyl]GEFTADQIEDFKEAFGLFDRVGDSKVAYNQVAD(IMRAL)[16.0078]GQNPTNK.D	5133.52	Match	9579000	110600000
tr|A0A2R8QTL0|A0A2R8QTL0_DANRE	Myosin light chain, phosphorylatable, fast skeletal muscle a OS=Danio rerio OX=7955 GN=mylpfa PE=1 SV=1	7	31	K.RRAAGGEGSSNVFSMFEQSQIQEYK.E	2805.33	Match	109800000	113300000
tr|A0A2R8RJJ2|A0A2R8RJJ2_DANRE	Zgc:86709 OS=Danio rerio OX=7955 GN=actc2 PE=3 SV=1	94	115	Y.NELRVAPEEHPTLLTEAPLNPK.A	2467.32	Match	7403000	121600000
tr|Q6ZM17|Q6ZM17_DANRE	Novel protein similar to zebrafish hemoglobin alpha-adult 1 (Hbaa1) OS=Danio rerio OX=7955 GN=si:ch211-5k11.8 PE=1 SV=1	2	32	M.(S)[Acetyl]LSDKDKAVVKAIWAKISPKADEIGAEALAR.M	3321.85	Match	76810000	122400000
tr|Q6P5L2|Q6P5L2_DANRE	Diazepam-binding inhibitor (GABA receptor modulator, acyl-CoA binding protein) OS=Danio rerio OX=7955 GN=dbi PE=1 SV=1	2	87	M.(S)[Acetyl]EAEFQKAAEEVKQLKAKPTDAEMLEIYSLYKQATVGDVNTARPGMLDFTGKAKWDAWDAKKGTSKEDAVKAYIAKVEELKGKYGI.	9564.98	Match	91330000	123800000
sp|Q7ZUY3|H2AX_DANRE	Histone H2AX OS=Danio rerio OX=7955 GN=h2ax PE=2 SV=3	44	76	R.VGAGAPVYLAAVLEYLTAEILELAGNAARDNKK.T	3399.87	Match	983800	124700000
tr|Q6PBR5|Q6PBR5_DANRE	V-type proton ATPase subunit G OS=Danio rerio OX=7955 GN=atp6v1g1 PE=1 SV=1	2	26	M.(A)[Acetyl]SQSQGIQQLLQAEKRAAEKVAEAR.K	2751.48	Match	68670000	125200000
tr|A0A1D5NS25|A0A1D5NS25_DANRE	Troponin T type 3b (skeletal, fast) (Fragment) OS=Danio rerio OX=7955 GN=tnnt3b PE=1 SV=1	94	129	R.IRAEKDKERQARREEERLRKEEADAKKRADEDAKKK.S	4408.42	Match	131200000	126300000
sp|Q7ZVF9|ACTB2_DANRE	Actin, cytoplasmic 2 OS=Danio rerio OX=7955 GN=actbb PE=1 SV=2	92	113	Y.NELRVAPEEHPVLLTEAPLNPK.A	2465.35	Match	14050000	127100000
sp|Q7ZUY3|H2AX_DANRE	Histone H2AX OS=Danio rerio OX=7955 GN=h2ax PE=2 SV=3	37	78	R.KGNYAERVGAGAPVYLAAVLEYLTAEILELAGNAARDNKKTR.I	4475.43	Match	158200000	127700000
sp|Q5BJA5|H2B1_DANRE	Histone H2B 1/2 OS=Danio rerio OX=7955 GN=zgc:112234 PE=2 SV=3	86	124	R.STITSREIQTAVRLLLPGELAKHAVSEGTKAVTKYTSSK.	4170.33	Match	118400000	131700000
sp|Q5MJ86|G3P2_DANRE	Glyceraldehyde-3-phosphate dehydrogenase 2 OS=Danio rerio OX=7955 GN=gapdh-2 PE=2 SV=1	265	335	K.AAHGPMKGILGYTEDSVVSSDFVGDTHSSIFDAGAGISLNDNFVKLISWYDNEFGYSHRVADLLMYMHSKE.	7810.71	Match	97140000	134000000
tr|Q6P0T7|Q6P0T7_DANRE	Tnnt3b protein OS=Danio rerio OX=7955 GN=tnnt3b PE=1 SV=1	2	36	M.(S)[Acetyl]DTEDVGVEEEKPKFKPSAPKIPDGDKVDFDDIQK.K	3943.95	Match	8133000	134400000
tr|A0A0R4IEZ2|A0A0R4IEZ2_DANRE	Actin alpha cardiac muscle 1a OS=Danio rerio OX=7955 GN=actc1a PE=1 SV=1	62	91	K.RGILTLKYPIE(H)[14.0283]GIITNWDDMEKIWHHTFY.N	3739.92	Match	128000000	134800000
tr|Q9I8U7|Q9I8U7_DANRE	Fast skeletal muscle myosin light polypeptide 3 OS=Danio rerio OX=7955 GN=mylz3 PE=1 SV=1	2	47	M.(A)[Acetyl]GEFTADQIEDFKEAFGLFDRVGDSKVAYNQVADIMRALGQNPTNK.D	5117.52	Match	29020000	147100000
tr|R4GE15|R4GE15_DANRE	Histone H2B OS=Danio rerio OX=7955 GN=si:ch211-113a14.22 PE=3 SV=1	16	124	K.AVTKTAGKGGKKRKRTRKESYAIYVYKVLKQVHPDTGISSKAMGIMNSFVNDIFERIAGEASRLAHYNKRSTITSREIQTAVRLLLPGELAKHAVSEGTKAVTKYTSSK.	12020.6	Match	117000000	149200000
sp|Q5BJA5|H2B1_DANRE	Histone H2B 1/2 OS=Danio rerio OX=7955 GN=zgc:112234 PE=2 SV=3	86	107	R.STITSREIQTAVRLLLPGELAK.H	2395.39	Match	137100000	151600000
sp|Q7ZUY3|H2AX_DANRE	Histone H2AX OS=Danio rerio OX=7955 GN=h2ax PE=2 SV=3	37	75	R.KGNYAERVGAGAPVYLAAVLEYLTAEILELAGNAARDNK.K	4090.19	Match	312200000	154100000
sp|Q5BJA5|H2B1_DANRE	Histone H2B 1/2 OS=Danio rerio OX=7955 GN=zgc:112234 PE=2 SV=3	20	124	K.TAGKGGKKRKRTRKESYAIYVYKVLKQVHPDTGISSKAMGIMNSFVNDIFERIAGEASRLAHYNKRSTITSREIQTAVRLLLPGELAKHAVSEGTKAVTKYTSSK.	11621.4	Match	169000000	154700000
tr|A0A1D5NS25|A0A1D5NS25_DANRE	Troponin T type 3b (skeletal, fast) (Fragment) OS=Danio rerio OX=7955 GN=tnnt3b PE=1 SV=1	85	129	R.RSERAEQQRIRAEKDKERQARREEERLRKEEADAKKRADEDAKKK.S	5549	Match	140300000	160900000
tr|A0A0R4IKF0|A0A0R4IKF0_DANRE	Apolipoprotein A-Ib OS=Danio rerio OX=7955 GN=apoa1b PE=1 SV=1	225	257	K.SGELRKELTELGEQVKPHFEGIFKALQKFASKE.	3773.04	Match	159400000	161600000
sp|Q5BJA5|H2B1_DANRE	Histone H2B 1/2 OS=Danio rerio OX=7955 GN=zgc:112234 PE=2 SV=3	15	124	K.KAVTKTAGKGGKKRKRTRKESYAIYVYKVLKQVHPDTGISSKAMGIMNSFVNDIFERIAGEASRLAHYNKRSTITSREIQTAVRLLLPGELAKHAVSEGTKAVTKYTSSK.	12148.7	Match	123600000	169400000
sp|Q90487|HBA_DANRE	Hemoglobin subunit alpha OS=Danio rerio OX=7955 GN=hbaa1 PE=2 SV=3	2	41	M.(S)[Acetyl]LSDTDKAVVKAIWAKISPKADEIGAEALA(RM)[16.0071]LTVYPQTK.T	4372.36	Match	19960000	170500000
tr|Q6ZM17|Q6ZM17_DANRE	Novel protein similar to zebrafish hemoglobin alpha-adult 1 (Hbaa1) OS=Danio rerio OX=7955 GN=si:ch211-5k11.8 PE=1 SV=1	2	44	M.(S)[Acetyl]LSDKDKAVVKAIWAKISPKADEIGAEALARMLTVYPQTKTYF.S	4794.6	Match	145300000	187500000
sp|Q6PI20|H33_DANRE	Histone H3.3 OS=Danio rerio OX=7955 GN=h3f3a PE=2 SV=3	27	136	A.RKSAPSTGGVKKPHRYRPGTVALREIRRYQKSTELLIRKLPFQRLVREIAQDFKTDLRFQSAAIGAL(Q)[-98.9906]EASEAYLVGLFEDTNLCAIHAKRVTIMPKDIQLARRIRGERA.	12482	Match	133500000	197600000
sp|Q7ZVF9|ACTB2_DANRE	Actin, cytoplasmic 2 OS=Danio rerio OX=7955 GN=actbb PE=1 SV=2	19	61	K.AGFAGDDAPRAVFPSIVGRPRHQGVMVGMGQKDSYVGDEAQSK.R	4487.22	Match	186200000	200000000
sp|Q90487|HBA_DANRE	Hemoglobin subunit alpha OS=Danio rerio OX=7955 GN=hbaa1 PE=2 SV=3	60	92	K.HGKTIMGAVGEAISKIDDLVGGLAALSELHAFK.L	3347.81	Match	199100000	200500000
tr|Q6ZM17|Q6ZM17_DANRE	Novel protein similar to zebrafish hemoglobin alpha-adult 1 (Hbaa1) OS=Danio rerio OX=7955 GN=si:ch211-5k11.8 PE=1 SV=1	2	41	M.(S)[Acetyl]LSDKDKAVVKAIWAKISPKADEIG(AE)[16.0152]ALARMLTVYPQTK.T	4399.41	Match	188600000	205300000
sp|Q5BJA5|H2B1_DANRE	Histone H2B 1/2 OS=Danio rerio OX=7955 GN=zgc:112234 PE=2 SV=3	86	120	R.STITSREIQTAVRLLLPGELAKHAVSEGTKAVTKY.T	3767.13	Match	209400000	209500000
sp|O73872|SODC_DANRE	Superoxide dismutase [Cu-Zn] OS=Danio rerio OX=7955 GN=sod1 PE=2 SV=1	2	154	M.VNKAVCVLKGTGEVTGTVYFNQEGEKKPVKVTGEITGLTPGKHGFHVHAFGDNTNGCISAGPHFN(PHDKT)[-1.9792]HGGPTDSVRHVGDLGNVTADASGVAKIEIEDAMLTLSGQHSIIGRTMVIHEKEDDLGKGGNEESLKTGNAGGRLACGVIGITQ.	15810	Match	202900000	221700000
sp|Q7ZUY3|H2AX_DANRE	Histone H2AX OS=Danio rerio OX=7955 GN=h2ax PE=2 SV=3	34	76	R.LLRKGNYAERVGAGAPVYLAAVLEYLTAEILELAGNAARDNKK.T	4600.54	Match	15560000	231500000
tr|A0A0N4STS4|A0A0N4STS4_DANRE	Ubiquitin B OS=Danio rerio OX=7955 GN=ubb PE=4 SV=1	1	76	.MQIFVKTLTGKTITLEVEPSDTIENVKAKIQDKEGIPPDQQRLIFAGKQLEDGRTLSDYNIQKESTLHLVLRLRGG.M	8559.68	Match	223500000	232200000
tr|A0A2R8RZK5|A0A2R8RZK5_DANRE	Tubulin alpha chain OS=Danio rerio OX=7955 GN=tuba1c PE=3 SV=1	54	84	F.SETGAGKHVPRAVFVDLEPTVIDEVRTGTYR.Q	3398.78	Match	242300000	233200000
sp|Q8JH70|ALDCB_DANRE	Fructose-bisphosphate aldolase C-B OS=Danio rerio OX=7955 GN=aldocb PE=2 SV=1	2	42	M.(T)[Acetyl]HQYPALTAEQKKELQDIAQRIVAPGKGILAADESTG(SMAK)[16.0014].R	4422.31	Match	76540000	234000000
tr|Q4V8S5|Q4V8S5_DANRE	Acbd7 protein OS=Danio rerio OX=7955 GN=acbd7 PE=1 SV=1	2	88	M.TLKAEFDQYAEDVKKVKTRPTDQELLDLYGLYKQAVVGDINIDKPGMIDLKGKAKWDAWDSRKGMSTEDAMKAYITLAKQAIEKYGK.	9881.19	Match	162600000	245100000
tr|Q804W1|Q804W1_DANRE	Parvalbumin 6 OS=Danio rerio OX=7955 GN=pvalb6 PE=1 SV=1	2	109	M.(A)[Acetyl]MSSILNHDDIKKALDACKAPDSFNHKSFFEMVGLKAKASDDVKKAFHLLDADNSGFIEEEELKFVLKAFATDGRDLTDKETKAFLQAADKDGDGKIGAEEFAALVRE.	11888	Match	187700000	254100000
sp|Q4QRF4|H32_DANRE	Histone H3.2 OS=Danio rerio OX=7955 GN=zgc:113984 PE=2 SV=3	26	136	A.(AR)[-171.0386]KSAPATGGVKKPHRYRPGTVALREIRRYQKSTELLIRKLPFQRLVREIAQDFKTDLRFQSSAVMALQEASEAYLVGLFEDTNLCAIHAKRVTIMPKDIQLARRIRGERA.	12541	Match	209200000	325900000
tr|A3KPR4|A3KPR4_DANRE	Histone H4 OS=Danio rerio OX=7955 GN=hist1h4l PE=2 SV=1	22	103	K.(VLRDNIQGITKPAIRRLAR)[156.1586]RGGVKRISGLIYEETRGVLKVFLENVIRDAVTYTEHAKRKTVTAMDVVYALKRQGRTLYGFGG.	9412.37	Match	269500000	328000000
tr|A3KPR4|A3KPR4_DANRE	Histone H4 OS=Danio rerio OX=7955 GN=hist1h4l PE=2 SV=1	2	103	M.SGRGKGGKGLGKGGAKRHR(KVLRDNIQGITKPAIRRLAR)[-457.2054]RGGVKRISGLIYEETRGVLKVFLENVIRDAVTYTEHAKRKTVTAMDVVYALKRQGRTLYGFGG.	10772.2	Match	260400000	373000000
tr|Q6IMW7|Q6IMW7_DANRE	Parvalbumin 4 OS=Danio rerio OX=7955 GN=pvalb4 PE=1 SV=1	2	109	M.(A)[Acetyl]FAGVLNDADI(SAALEAC)[15.0391]KAADSFNHKSFFAKVGLASKSADEVKKAFAIIDQDKSGFIEEEELKLFLQNFKADARALTDGETKTFLKAGDSDGDGKIGIDEFAALVKA.	11499.9	Match	280100000	488800000
tr|A3KPR4|A3KPR4_DANRE	Histone H4 OS=Danio rerio OX=7955 GN=hist1h4l PE=2 SV=1	20	103	H.(RKVLRDNIQGITK)[180.1162]PAIRRLARRGGVKRISGLIYEETRGVLKVFLENVIRDAVTYTEHAKRKTVTAMDVVYALKRQGRTLYGFGG.	9720.52	Match	321100000	518000000
sp|Q90487|HBA_DANRE	Hemoglobin subunit alpha OS=Danio rerio OX=7955 GN=hbaa1 PE=2 SV=3	2	41	M.(S)[Acetyl]LSDTDKAVVKAIWAKISPKADEIGAEALARMLTVYPQTK.T	4356.36	Match	110800000	706900000
sp|Q6PI20|H33_DANRE	Histone H3.3 OS=Danio rerio OX=7955 GN=h3f3a PE=2 SV=3	58	136	K.STELLIRKLPFQRLVREIAQDFKTDLRFQSAAIGALQEASEAYLVGLFEDTNLCAIHAKRVTIMPKDIQLARRIRGERA.	9006.97	Match	563000000	753800000
tr|Q6ZM17|Q6ZM17_DANRE	Novel protein similar to zebrafish hemoglobin alpha-adult 1 (Hbaa1) OS=Danio rerio OX=7955 GN=si:ch211-5k11.8 PE=1 SV=1	2	41	M.(S)[Acetyl]LSDKDKAVVKAIWAKISPKADEIGAEALARMLTVYPQTK.T	4383.42	Match	943400000	942900000
sp|Q4QRF4|H32_DANRE	Histone H3.2 OS=Danio rerio OX=7955 GN=zgc:113984 PE=2 SV=3	58	136	K.STELLIRKLPFQRLVREIAQDFKTDLRFQSSAVMALQEASEAYLVGLFEDTNLCAIHAKRVTIMPKDIQLARRIRGERA.	9081.98	Match	740900000	968600000
sp|Q804W2|PRV7_DANRE	Parvalbumin-7 OS=Danio rerio OX=7955 GN=pvalb7 PE=3 SV=3	2	109	M.(A)[Acetyl]MKNLLKDDDIKKALDQFKAADSFDHKKFFDVVGLKALSADNVKLVFKALDVDASGFIEEEELKFVLKGFSADGRDLTDKETKAFLAAADKDGDGKIGIDEFEALVHE.	11931.2	Match	1016000000	1272000000
tr|A3KPR4|A3KPR4_DANRE	Histone H4 OS=Danio rerio OX=7955 GN=hist1h4l PE=2 SV=1	18	103	K.RH(RKVLR)[-128.0543]DNIQGITKPAIRRLARRGGVKRISGLIYEETRGVLKVFLENVIRDAVTYTEHAKRKTVTAMDVVYALKRQGRTLYGFGG.	9705.53	Match	1496000000	1780000000
sp|Q6PI52|CALM_DANRE	Calmodulin OS=Danio rerio OX=7955 GN=calm1a PE=2 SV=3	2	149	M.(A)[Acetyl]DQLTEEQIAEFKEAFSLFDKDGDGTITTKELGTVMRSLGQNPTEAELQDMINEVDADGNGTIDF(PEFLTMMARKMKDTDSEEEIREA)[42.0463]FRVFDKDGNGYISAAELRHVMTNLGEKLTDEEVDEMIREADIDGDGQVNYEEFVQMMTAK.	16780	Match	1903000000	3180000000
sp|Q8JFV8|VAT1_DANRE	Synaptic vesicle membrane protein VAT-1 homolog OS=Danio rerio OX=7955 GN=vat1 PE=2 SV=1	437	484	K.KKDDKKKEDKKKDEAKKEEKKDEKKKEEAKKDDKKAEEKKEEVKKEEN.	5873.21	No match		4025000
sp|Q1LYB6|ATF1B_DANRE	ATPase inhibitor B, mitochondrial OS=Danio rerio OX=7955 GN=atp5if1b PE=3 SV=1	73	99	R.RHHQEEIDHHKKEIERLQHEITRHESK.I	3478.8	No match		2806000
sp|Q8JFV8|VAT1_DANRE	Synaptic vesicle membrane protein VAT-1 homolog OS=Danio rerio OX=7955 GN=vat1 PE=2 SV=1	442	484	K.KKEDKKKDEAKKEEKKDEKKKEEAKKDDKKAEEKKEEVKKEEN.	5258.86	No match		6611000
tr|A0A1D5NS25|A0A1D5NS25_DANRE	Troponin T type 3b (skeletal, fast) (Fragment) OS=Danio rerio OX=7955 GN=tnnt3b PE=1 SV=1	103	129	R.QARREEERLRKEEADAKKRADEDAKKK.S	3282.78	No match		6834000
tr|A0A1D5NS25|A0A1D5NS25_DANRE	Troponin T type 3b (skeletal, fast) (Fragment) OS=Danio rerio OX=7955 GN=tnnt3b PE=1 SV=1	99	129	K.DKERQARREEERLRKEEADAKKRADEDAKKK.S	3811.04	No match		3900000
sp|Q1LYB6|ATF1B_DANRE	ATPase inhibitor B, mitochondrial OS=Danio rerio OX=7955 GN=atp5if1b PE=3 SV=1	74	99	R.HHQEEIDHHKKEIERLQHEITRHESK.I	3322.69	No match		5047000
sp|Q8JFV8|VAT1_DANRE	Synaptic vesicle membrane protein VAT-1 homolog OS=Danio rerio OX=7955 GN=vat1 PE=2 SV=1	459	484	D.EKKKEEAKKDDKKAEEKKEEVKKEEN.	3173.7	No match		1779000
tr|A0A1D5NSK1|A0A1D5NSK1_DANRE	Troponin T type 3b (skeletal, fast) (Fragment) OS=Danio rerio OX=7955 GN=tnnt3b PE=1 SV=1	99	133	K.KRQNKDLVELQALIDAHFEHRKKEEEELI(ALKDRI)[413.2533].	4667.59	No match		65970000
tr|Q6DHP2|Q6DHP2_DANRE	Troponin I type 2b (skeletal, fast), tandem duplicate 2 OS=Danio rerio OX=7955 GN=tnni2b.2 PE=1 SV=1	138	170	L.KQVKKEVKEEDKEAVGDWRKNIEDKAGMGGRKK.M	3812.05	No match		297000
tr|Q6DHP2|Q6DHP2_DANRE	Troponin I type 2b (skeletal, fast), tandem duplicate 2 OS=Danio rerio OX=7955 GN=tnni2b.2 PE=1 SV=1	84	110	A.KSDKEIEDLKIKVQDLIGKFKKPALKK.V	3137.89	No match		2264000
tr|A0A1D5NS25|A0A1D5NS25_DANRE	Troponin T type 3b (skeletal, fast) (Fragment) OS=Danio rerio OX=7955 GN=tnnt3b PE=1 SV=1	94	139	R.IRAEKDKERQARREEERLRKEEADAKKRADEDAKKKSALSNMGSQY.S	5446.85	No match		8454000
tr|A3KPR4|A3KPR4_DANRE	Histone H4 OS=Danio rerio OX=7955 GN=hist1h4l PE=2 SV=1	14	103	K.GGAKRHRKVLRDNIQGIT(KP)[28.0774]AIRRLARRGGVKRISGLIYEETRGVLKVFLENVIRDAVTYTEHAKRKTVTAMDVVYALKRQGRTLYGFGG.	10174.8	No match		100300000
sp|Q5BJA5|H2B1_DANRE	Histone H2B 1/2 OS=Danio rerio OX=7955 GN=zgc:112234 PE=2 SV=3	11	124	K.KGSKKAVTKTAGKGGKKRKRTRKESYAIYVYKVLKQVHPDTGISSKAMGIMNSFVNDIFERIAGEASRLAHYNKRSTITSREIQTAVRLLLPGELAKHAVSEGTKAVTKYTSSK.	12549	No match		701300000
tr|A3KPR4|A3KPR4_DANRE	Histone H4 OS=Danio rerio OX=7955 GN=hist1h4l PE=2 SV=1	1	103	.MSGRGKGGKGLGKGGAKRHRKVLRDNIQGITKPAIRRLARRGGVKRIS(GL)[-60.9520]IYEETRGVLKVFLENVIRDAVTYTEHAKRKTVTAMDVVYALKRQGRTLYGFGG.	11299.5	No match		96200000
tr|A3KPR4|A3KPR4_DANRE	Histone H4 OS=Danio rerio OX=7955 GN=hist1h4l PE=2 SV=1	2	103	M.(SGRGKGG)[-415.1868]KGLGKGGAKRHRKVLRDNIQGITKPAIRRLARRGGVKRISGLIYEETRGVLKVFLENVIRDAVTYTEHAKRKTVTAMDVVYALKRQGRTLYGFGG.	10814.2	No match		145500000
tr|A0A140LG54|A0A140LG54_DANRE	Histone H2B OS=Danio rerio OX=7955 GN=si:dkey-23a13.22 PE=3 SV=1	94	124	I.(QTAV)[-272.0228]RLLLPGELAKHAVSEGTKAVTKYTSSK.	3010.8	No match		8893000
tr|A0A1D5NS25|A0A1D5NS25_DANRE	Troponin T type 3b (skeletal, fast) (Fragment) OS=Danio rerio OX=7955 GN=tnnt3b PE=1 SV=1	26	84	K.FKPSAPKIPDGDKVDFDDIQKKRQNKDLVELQALIDAHFEHRKKEEEELIALKDRIEKR.R	7008.8	No match		78410000
tr|F1R4A4|F1R4A4_DANRE	Histone H2B OS=Danio rerio OX=7955 GN=zgc:171759 PE=1 SV=1	11	124	K.KGSKKAVTKTAGKSGKKRRRTRKESYAIYVYKVLKQVHPDTGISSKAMGIMNSFVNDIFERIAGEASRLAHYNKRSTITSREIQTAVRLLLPGELAKHAVSEGTKAVTKYTSSK.	12607	No match		189600000
sp|Q6PI20|H33_DANRE	Histone H3.3 OS=Danio rerio OX=7955 GN=h3f3a PE=2 SV=3	29	136	K.SAPSTGGVKKPHRYRPGTVALREIRRYQKSTELLIR(KLPFQRLVREIAQDFKTD)[197.2093]LRFQSAAIGALQEASEAYLVGLFEDTNLCAIHAKRVTIMPKDIQLARRIRGERA.	12494	No match		194600000
tr|A8KBJ5|A8KBJ5_DANRE	Histone H3 OS=Danio rerio OX=7955 GN=zgc:173552 PE=1 SV=1	29	136	K.SAPATGGVKKPHRYRPGTVALREIRRYQKSTEL(LIRKLPFQRLVREIAQD)[155.1704]FKTDLRFQSSAVMALQESSEAYLVGLFEDTNLCAIHAKRVTIMPKDIQLARRIRGERA.	12528	No match		265600000
tr|A0A0N4STS4|A0A0N4STS4_DANRE	Ubiquitin B OS=Danio rerio OX=7955 GN=ubb PE=4 SV=1	1	74	.MQIFVKTLTGKTITLEVEPSDTIENVKAKIQDKEGIPPDQQRLIFAGKQLEDGRTLSDYNIQKESTLHLVLRLR.G	8445.63	No match		317800000
tr|Q568Q7|Q568Q7_DANRE	Stathmin OS=Danio rerio OX=7955 GN=stmn1b PE=1 SV=1	127	149	K.EKDKKLEEVRKNKETKEGGEDEN.	2731.38	No match		6842000
sp|Q4QRF4|H32_DANRE	Histone H3.2 OS=Danio rerio OX=7955 GN=zgc:113984 PE=2 SV=3	22	136	L.ATKAARKSAPATGGVKKPHRYRPGTVALREIRRYQKSTELLIRKLPFQRLVREIAQDFKTDLRFQSSAVMALQEAS(E)[327.4951]AYLVGLFEDTNLCAIHAKRVTIMPKDIQLARRIRGERA.	13410.7	No match		5172000
tr|Q4FZZ7|Q4FZZ7_DANRE	Histone H2A OS=Danio rerio OX=7955 GN=hist1h2a2 PE=2 SV=1	2	123	M.(S)[Acetyl]GRGKTGGKARAKAKTRSSRAGLQFPVGRVHRLLRKGNYAQRVGAGAPVYLAAVLEYLT(AEILELAGNAARDNKK)[-15.9495]TRIIPRHLQLAVRNDEELNKLLGGVTIAQGGVLPNIQAVLLPKKTEK.A	13119.6	No match		70460000
tr|A0A1D5NS25|A0A1D5NS25_DANRE	Troponin T type 3b (skeletal, fast) (Fragment) OS=Danio rerio OX=7955 GN=tnnt3b PE=1 SV=1	48	78	K.RQNKDLVELQALIDAHFEHRKKEEEELIALK.D	3742.04	No match		25460000
tr|A4FVM2|A4FVM2_DANRE	Histone H2A OS=Danio rerio OX=7955 GN=hist1h2a6 PE=2 SV=1	2	123	M.(S)[Acetyl]GRGKTGGKARAKAKTRSSRAGLQFPVGRVHRLLRKGNYAQRVGAGAPVYLAAVLEYLTAEILELAGNAARDNKKTRIIPRHLQLAVRNDEELNKLLGGVTIAQGGVLPNIQAVLLPKKTEK.A	13135.5	No match		141300000
sp|Q6PI20|H33_DANRE	Histone H3.3 OS=Danio rerio OX=7955 GN=h3f3a PE=2 SV=3	25	136	K.AARKSAPSTGGVKKPHRYRPGTVALREIRRYQKSTELLIRKLPFQRLVREIAQDFKTDLRFQSAA(IGALQEASEA)[-165.8563]YLVGLFEDTNLCAIHAKRVTIMPKDIQLARRIRGERA.	12557	No match		238300000
tr|Q561S9|Q561S9_DANRE	Histone H2A OS=Danio rerio OX=7955 GN=hist1h2a3 PE=2 SV=1	2	113	M.(S)[Acetyl]GRGKTGGKARAKAKSRSSRAGLQFPVGRVHRLLRKGNYAQRVGAGAPVYLAAVLEYLTAEILELAGNAARDNKKTRIIPRHLQLAVRNDEELNKLLGGVTIAQGGVLPNIQ.A	12014.8	No match		91660000
tr|A0A2R8Q2N5|A0A2R8Q2N5_DANRE	Myosin, heavy polypeptide 1.2, skeletal muscle OS=Danio rerio OX=7955 GN=myhz1.2 PE=3 SV=1	1819	1845	R.VRELESEVEAEQRRGADAVKGVRKYER.R	3158.68	No match		19570000
tr|A4FVM2|A4FVM2_DANRE	Histone H2A OS=Danio rerio OX=7955 GN=hist1h2a6 PE=2 SV=1	2	119	M.(S)[Acetyl]GRGKTGGKARAKAKTRSSRAGLQFPVGRVHRLLRKGNYAQRVGAGAPVYLAAVLEYLTAEILELAGNAARDNKKTRIIPRHLQLAVRNDEELNKLLGGVTIAQGGVLPNIQAVLLPK.K	12649.2	No match		23270000
tr|A4FVM2|A4FVM2_DANRE	Histone H2A OS=Danio rerio OX=7955 GN=hist1h2a6 PE=2 SV=1	2	114	M.(S)[Acetyl]GRGKTGGKARAKAKTRSSRAGLQFPVGRVHRLLRKGNYAQRVGAGAPVYLAAVLEYLTAEILELAGNAARDNKKTRIIPRHLQLAVRNDEELNKLLGGVTIAQGGVLPNIQA.V	12097.9	No match		53910000
tr|Q6XG62|Q6XG62_DANRE	Protein S100 OS=Danio rerio OX=7955 GN=icn PE=1 SV=1	2	95	M.(A)[Acetyl]TSDTQKAMAMLIATFHKYSGKEGDKLTLSKGELKELLSAELGDIFGKTTDKAALDKIFKDLDANADGSVDFQEYITL(IACITMLCNEFFTGKK)[-2.0063].	10309.3	No match		257600000
tr|Q6DHP2|Q6DHP2_DANRE	Troponin I type 2b (skeletal, fast), tandem duplicate 2 OS=Danio rerio OX=7955 GN=tnni2b.2 PE=1 SV=1	142	162	K.KEVKEEDKEAVGDWRKNIEDK.A	2544.3	No match		4835000
tr|E7FE37|E7FE37_DANRE	Riboflavin kinase OS=Danio rerio OX=7955 GN=rfk PE=4 SV=1	113	163	L.DELITAIHNDIEEAKKKLDLPEHLKLKEDNFFKTSVSTTSNQILNGQHSLL.	5814.09	No match		64040000
tr|Q568Q7|Q568Q7_DANRE	Stathmin OS=Danio rerio OX=7955 GN=stmn1b PE=1 SV=1	129	149	K.DKKLEEVRKNKETKEGGEDEN.	2474.24	No match		1864000
tr|A7MBY4|A7MBY4_DANRE	Histone H2B OS=Danio rerio OX=7955 GN=zgc:171759 PE=1 SV=1	1	28	.((M)[Acetyl]GIMNS)[-128.8752]FVNDIFERIAGEASRLAHYNKR.S	3151.66	No match		980900
tr|A8KBJ5|A8KBJ5_DANRE	Histone H3 OS=Danio rerio OX=7955 GN=zgc:173552 PE=1 SV=1	2	136	M.(A)[Acetyl]RTKQTARKSTGGKA(PRKQLAT)[189.9947]KAARKSAPATGGVKKPHRYRPGTVALREIRRYQKSTELLIRKLPFQRLVREIAQDFKTDLRFQSSAVMALQESSEAYLVGLFEDTNLCAIHAKRVTIMPKDIQLARRIRGERA.	15495.6	No match		852900
sp|Q6PI20|H33_DANRE	Histone H3.3 OS=Danio rerio OX=7955 GN=h3f3a PE=2 SV=3	56	136	Y.QKSTELLIRKLPFQRLVREIAQDFKTDLRFQSAAIGALQEASEAYLVGLFEDTNLCAIHAKRVTIMPKDIQLARRIRGERA.	9263.14	No match		62830000
sp|Q6PI20|H33_DANRE	Histone H3.3 OS=Danio rerio OX=7955 GN=h3f3a PE=2 SV=3	60	136	T.(ELL)[-226.1427]IRKLPFQRLVREIAQDFKTDLRFQSAAIGALQEASEAYLVGLFEDTNLCAIHAKRVTIMPKDIQLARRIRGERA.	8592.52	No match		143300000
tr|E7FAD0|E7FAD0_DANRE	Myosin, heavy polypeptide 1.1, skeletal muscle OS=Danio rerio OX=7955 GN=myhz1.1 PE=1 SV=3	1600	1625	R.KVQHEMEEAQERADIAESQVNKLRAK.S	3037.57	No match		3131000
tr|A0A140LG23|A0A140LG23_DANRE	Histone H3 OS=Danio rerio OX=7955 GN=hist2h3ca1 PE=3 SV=1	80	136	F.(KTDQRFQSSAVMALQEASEA)[-17.9347]YLVGLFEDTNLCAIHAKRVTIMPKDIQLARRIRGERA.	6426.25	No match		3463000
sp|Q6PI20|H33_DANRE	Histone H3.3 OS=Danio rerio OX=7955 GN=h3f3a PE=2 SV=3	58	136	K.STELLIRKLPFQRLVREIAQD(FKTDLRFQSAA)[14.0354]IGALQEASEAYLVGLFEDTNLCAIHAKRVTIMPKDIQLARRIRGERA.	9020.98	No match		465500000
tr|A8KBJ5|A8KBJ5_DANRE	Histone H3 OS=Danio rerio OX=7955 GN=zgc:173552 PE=1 SV=1	58	136	K.STELLIRKLPFQRLVREIAQDFKTDLRFQSSAVMALQESSEAYLVGLFEDTNLCAIHAKRVTIMPKDIQLARRIRGERA.	9098.96	No match		885100000
tr|A0A2R8QTL0|A0A2R8QTL0_DANRE	Myosin light chain, phosphorylatable, fast skeletal muscle a OS=Danio rerio OX=7955 GN=mylpfa PE=1 SV=1	7	168	K.RRAAGGEGSSNVFSMFEQSQIQEYKEAFTIIDQNRDGIISKDDLRDVLASMGQLNVKNEELEAMIKEASGPINFTVFLTMFGEKLKGADPEDVIVSAFKVLD(PEGTGSIKKEFLEELLTTQCDRFTAEEMKNLWAAFPPDVAGNVDYKNICYVITHGEEKEE)[-1.9787].	18097	No match		44980000
tr|A0A140LG23|A0A140LG23_DANRE	Histone H3 OS=Danio rerio OX=7955 GN=hist2h3ca1 PE=3 SV=1	58	136	K.STELLIRKLPFQRLVREIAQDFKTDQRFQSSAVMALQE(A)[15.0484]SEAYLVGLFEDTNLCAIHAKRVTIMPKDIQLARRIRGERA.	9112.99	No match		250900000
tr|Q6DHP2|Q6DHP2_DANRE	Troponin I type 2b (skeletal, fast), tandem duplicate 2 OS=Danio rerio OX=7955 GN=tnni2b.2 PE=1 SV=1	143	162	K.EVKEEDKEAVGDWRKNIEDK.A	2416.2	No match		42120000
tr|A0A0R4IKF0|A0A0R4IKF0_DANRE	Apolipoprotein A-Ib OS=Danio rerio OX=7955 GN=apoa1b PE=1 SV=1	23	49	Q.DEPPSQLEHVKSALQVYADHLKQAAHK.S	3038.58	No match		126600000
sp|Q804W2|PRV7_DANRE	Parvalbumin-7 OS=Danio rerio OX=7955 GN=pvalb7 PE=3 SV=3	2	109	M.(A)[Acetyl]MKNLLKDDDIKKALDQFKAADSFDHKKFFDVVGLKALSADNVKLVFKALDVD(A)[15.0828]SGFIEEEELKFVLKGFSADGRDLTDKETKAFLAAADKDGDGKIGIDEFEALVHE.	11947.2	No match		165800000
tr|E9QBP3|E9QBP3_DANRE	Actin, beta 1 OS=Danio rerio OX=7955 GN=actb1 PE=1 SV=1	62	91	K.RGILTLKYPIE(H)[14.0234]GIVTNWDDMEKIWHHTFY.N	3725.91	No match		137200000
tr|A0A0R4IP01|A0A0R4IP01_DANRE	Oxoglutarate dehydrogenase a OS=Danio rerio OX=7955 GN=ogdha PE=1 SV=1	985	1022	Y.AGREPAAAPATGNKNTHLLELKRFLDTAFNLDAFKDHI.	4162.2	No match		9098000
tr|A0A2R8QTL0|A0A2R8QTL0_DANRE	Myosin light chain, phosphorylatable, fast skeletal muscle a OS=Danio rerio OX=7955 GN=mylpfa PE=1 SV=1	32	168	K.EAFTIIDQNRDGIISKDDLRDVLASMGQLNVKNEELEAMIKEASGPINFTVFLTMFGEKLKGADPEDVIVSAFKVLDPEGTGSIKKEF(LEELLTTQCDRFTAEEMKNLWAAFPPDVAGNVDYKNICYVITHGEEKEE)[-131.0575].	15180.7	No match		52250000
tr|Q8AY63|Q8AY63_DANRE	Creatine kinase OS=Danio rerio OX=7955 GN=ckbb PE=1 SV=1	106	135	K.HKTDLNPDNLKGGDDLDPNYVLSSRVRTGR.S	3351.72	No match		1267000
tr|Q9I8N9|Q9I8N9_DANRE	Brain-type fatty acid-binding protein OS=Danio rerio OX=7955 GN=fabp7a PE=1 SV=1	2	132	M.(V)[Acetyl]DAFCATWKLVDSQNFDEYMKSLGVGFATRQVGNVTKPTIVISHEGDKVVIKTLSTFKNTEISFKLGEEFDETTADDRHVKSTVSLEGDNLVQVQRWDGKETKFVREIKDGKMVMTLTFEGVQAVRTYEKA.	14819.6	No match		289700000
tr|Q6PBR5|Q6PBR5_DANRE	V-type proton ATPase subunit G OS=Danio rerio OX=7955 GN=atp6v1g1 PE=1 SV=1	2	28	M.(A)[Acetyl]SQSQGIQQLLQAEKRAAEKVAEARKR.K	3035.68	No match		6107000
tr|A0A2R8QTL0|A0A2R8QTL0_DANRE	Myosin light chain, phosphorylatable, fast skeletal muscle a OS=Danio rerio OX=7955 GN=mylpfa PE=1 SV=1	32	168	K.EAFTIIDQNRDGIISKDDLRDVLASMGQLNVKNEELEAMIKEASGPINFTVFLTMFGEKLKGADPEDVIVSAFKVLDPE(GTGSIKKEFLEELLTTQCDRFTAEEMKNLWAAFPPDVAGNVDYKNICYVITHGEEKEE)[-2.9892].	15308.7	No match		236800000
sp|Q6NWH2|MRPB_DANRE	MARCKS-related protein 1-B OS=Danio rerio OX=7955 GN=marcksl1b PE=2 SV=1	59	95	A.KESEAGAGDAIEPAPAAEGEAAKPEGEATKETPKKKK.K	3718.91	No match		1059000
tr|A0A2R8QTL0|A0A2R8QTL0_DANRE	Myosin light chain, phosphorylatable, fast skeletal muscle a OS=Danio rerio OX=7955 GN=mylpfa PE=1 SV=1	105	168	F.KVLDPEGTGSIKKEFLEELL(TTQCDRFTAEEMKNLWAAFPPDVAGNVDYKNICYVI)[-1.9889]THGEEKEE.	7285.57	No match		9850000
tr|Q6XNL8|Q6XNL8_DANRE	Actin OS=Danio rerio OX=7955 GN=acta1b PE=1 SV=1	63	115	S.KRGIL(TLKYPIEH)[-114.0631]GIITNWDDMEKIWHHTFYNELRVAPEEHPTLLTEAPLNPK.A	6189.26	No match		103600000
tr|A3KPI6|A3KPI6_DANRE	Si:ch211-288g17.3 OS=Danio rerio OX=7955 GN=si:ch211-288g17.3 PE=1 SV=1	80	99	R.KIPLTPEEESERLQRLSVQR.K	2407.34	No match		14360000
tr|Q7T334|Q7T334_DANRE	Malate dehydrogenase OS=Danio rerio OX=7955 GN=mdh2 PE=1 SV=1	301	337	K.NLGLGKLSAFEEKLVADAMTELKGSIKKGEDFVANMK.	3981.12	No match		16660000
tr|F1QCR7|F1QCR7_DANRE	160 kDa neurofilament protein OS=Danio rerio OX=7955 GN=nefma PE=1 SV=1	81	122	K.RSNEKEQLQGLNDRFAGYIDKVHFLEQQNQQIEAEIQALRQK.Q	5010.61	No match		27110000
tr|E7FAE7|E7FAE7_DANRE	Si:ch211-105c13.3 OS=Danio rerio OX=7955 GN=si:ch211-105c13.3 PE=1 SV=1	1	91	.(M)[Acetyl]EGAIKTVVMQYLSSARGKENLGGKNFQKLVQSQLGNILSDTESSSAVKEMMRGLDDNQDGKVSFQEYMTLVGYLATSLSEQKASGQEDKH.	9999.99	No match		12230000
tr|F1Q9A4|F1Q9A4_DANRE	Cytochrome c oxidase subunit 7A2a OS=Danio rerio OX=7955 GN=cox7a2a PE=1 SV=1	24	83	Q.LENKVPNKQKLFQEDNDLPVHLKGGLTDGLLYRLT(MA)[16.0003]LTIFGSGYVVYTLFDAAMPKKKD.	6768.61	No match		41290000
tr|X1WER9|X1WER9_DANRE	Cytochrome c oxidase subunit 8B OS=Danio rerio OX=7955 GN=cox8b PE=3 SV=1	40	73	Q.(VIAL)[2.2414]SVMFVTILGPSGWILSHLEDYKHRPGAAQE.	3736.1	No match		12670000
tr|Q6ZM17|Q6ZM17_DANRE	Novel protein similar to zebrafish hemoglobin alpha-adult 1 (Hbaa1) OS=Danio rerio OX=7955 GN=si:ch211-5k11.8 PE=1 SV=1	2	59	M.(S)[Acetyl]LSDKDKAVVKAIWAKISPKADEIGAEALARMLTVYPQTKTYFSHWSDLSPGSGPVKK.H	6356.39	No match		32860000
tr|Q502P6|Q502P6_DANRE	Complex I-15 kDa OS=Danio rerio OX=7955 GN=ndufs5 PE=1 SV=1	2	29	M.PFIDLQSKLGINVDKWLLAQSGEQPRKR.A	3234.8	No match		1050000
tr|Q8AY63|Q8AY63_DANRE	Creatine kinase OS=Danio rerio OX=7955 GN=ckbb PE=1 SV=1	106	132	K.HKTDLNPDNLKGGDDLDPNYVLSSRVR.T	3037.55	No match		46850000
tr|E7FD23|E7FD23_DANRE	Si:dkey-276j7.1 OS=Danio rerio OX=7955 GN=si:dkey-276j7.1 PE=1 SV=1	118	168	K.GALQRLEPPFGTDNGSAWDSDKDKNVSYTAAEMEKLSLSQKDIDEANKFKK.I	5672.8	No match		27630000
tr|Q5XJK2|Q5XJK2_DANRE	Histone H2A OS=Danio rerio OX=7955 GN=h2ax1 PE=2 SV=1	36	76	L.RKGNYAERVGAGAPVYLAAVLEYLTAEILELAGNAARDNKK.T	4374.38	No match		151900000
sp|Q7ZUY3|H2AX_DANRE	Histone H2AX OS=Danio rerio OX=7955 GN=h2ax PE=2 SV=3	77	105	K.TRIIPRHLQLAVRNDEELNKLLGGVTIAQ.G	3266.88	No match		17370000
tr|R4GE02|R4GE02_DANRE	Si:ch211-113a14.11 OS=Danio rerio OX=7955 GN=si:ch211-113a14.11 PE=1 SV=1	115	144	R.STITSREIQTAVRLLLPGELAKHAVSEGTK.A	3204.81	No match		84320000
tr|E7FE03|E7FE03_DANRE	N-ethylmaleimide-sensitive factor attachment protein, beta a OS=Danio rerio OX=7955 GN=napba PE=1 SV=2	1	22	.(M)[Acetyl]DNSGKEKEAMQLMAEADKKVK.S	2522.24	No match		11160000
tr|Q7ZUQ9|Q7ZUQ9_DANRE	Cirbp protein OS=Danio rerio OX=7955 GN=cirbpb PE=1 SV=1	2	87	M.(S)[Acetyl]DEGKLFIGGLSYDTTEQSLEEAFSKYGTIAKVDVIRDRETDRSRGFGFVTFENPEDAKDAMAAMNGKQVDGRMIRVDEAGKSGGR.S	9463.64	No match		180000000
sp|Q6PI52|CALM_DANRE	Calmodulin OS=Danio rerio OX=7955 GN=calm1a PE=2 SV=3	2	149	M.(A)[Acetyl]DQLTEEQIAEFKEAFSLFDKDGDGTITTKELGTVMRSLGQNPTEAELQDMINEVDADGNGTIDFPE(F)[13.0272]LTMMARKMKDTDSEEEIREAFRVFDKDGNGYISAAELRHVMTNLGEKLTDEEVDEMIREADIDGDGQVNYEEFVQMMTAK.	16750.9	No match		375600000
tr|A0A2R8QTL0|A0A2R8QTL0_DANRE	Myosin light chain, phosphorylatable, fast skeletal muscle a OS=Danio rerio OX=7955 GN=mylpfa PE=1 SV=1	106	168	K.VLDPEGTGSIKKEFLEELLTTQCDRFTAEEMKNLWAAFPPDVAGNVDYKN(ICYVITHGEE)[-131.0417]KEE.	7028.43	No match		114900000
tr|Q4VBU7|Q4VBU7_DANRE	Cytochrome c oxidase polypeptide Va OS=Danio rerio OX=7955 GN=cox5aa PE=1 SV=1	33	78	Y.SHGKQETDEEFDARWVTYFSKPDIDAWELRKGMNTLIGYDLVPEPK.I	5410.67	No match		61540000
tr|Q6IMW7|Q6IMW7_DANRE	Parvalbumin 4 OS=Danio rerio OX=7955 GN=pvalb4 PE=1 SV=1	2	109	M.(A)[Acetyl]FAGVLNDADISAALEACKAADSFNHKSFFAKVGLASKSADEVKKAFAIIDQDKSGFIEEEELKLFLQNFKADARALTDGETKTFLKAGDSDGDGKIGIDEFAALVKA.	11484.9	No match		10890000000
tr|A0A2R8QTL0|A0A2R8QTL0_DANRE	Myosin light chain, phosphorylatable, fast skeletal muscle a OS=Danio rerio OX=7955 GN=mylpfa PE=1 SV=1	106	168	K.VLDPEGTGSIKKEFLEELL(TTQCDRFTAEEMKNLWAAFPPDVAGNVDYKNICY)[-2.0021]VITHGEEKEE.	7157.47	No match		352000000
tr|Q566W6|Q566W6_DANRE	Cold-inducible RNA-binding protein a OS=Danio rerio OX=7955 GN=cirbpa PE=1 SV=1	2	91	M.(S)[Acetyl]DEGKLFIGGLSFDTTEQSLEDAFSKYGVITNVHVARNRETNRSRGFGFVTFENPDDAKDALEGMNGKSVDGRTIRVDEAGKGGGGGGGR.S	9564.72	No match		75530000
tr|A0A2R8Q1X2|A0A2R8Q1X2_DANRE	2-phospho-D-glycerate hydro-lyase OS=Danio rerio OX=7955 GN=eno1a PE=1 SV=1	254	281	K.GGKYDLDFKSPDDPSRYISPDKLADLYK.S	3202.6	No match		16440000
sp|B3DFW5|STMP1_DANRE	Short transmembrane mitochondrial protein 1 OS=Danio rerio OX=7955 GN=stmp1 PE=2 SV=1	1	46	.MMQFILGFT(LGNV)[-6.7871]VGMYLAQNYEVPNISKKIEAFKKDVEAKKKPPE.	5235.82	No match		378400000
tr|B3DFP9|B3DFP9_DANRE	Apolipoprotein A-II OS=Danio rerio OX=7955 GN=apoa2 PE=1 SV=1	21	101	Q.(E)[111.0560]WPVPDKELVDKYDGLRTVFIKRLVNAWEKIKTAVEPALEGSPTAGSLKDVVEELKKSPRVESFIKIAGGLASELEPVVDK.A	9066.96	No match		113800000
tr|Q9I8U7|Q9I8U7_DANRE	Fast skeletal muscle myosin light polypeptide 3 OS=Danio rerio OX=7955 GN=mylz3 PE=1 SV=1	2	151	M.(A)[Acetyl]GEFTADQIEDFKEAFGLFDRVGDSKVAYNQVADIMRALGQNPTNKDVKKILGDPSADDMANKRIDFEAFLPMLKTVDANQKGTYDDYVEGLRVFDKEGNGTVMGAELRIVLSTLGEKMSEPEIDALMQGQEDENGMVHYEAFVKNIMSV.	16669.2	No match		417200000
tr|A2BGX6|A2BGX6_DANRE	Myosin heavy chain 4 OS=Danio rerio OX=7955 GN=myhc4 PE=1 SV=1	1900	1921	R.KVQHELEEAEERADISESQVNK.L	2567.26	No match		9382000
tr|Q45QT2|Q45QT2_DANRE	Thymosin beta OS=Danio rerio OX=7955 GN=tmsb4x PE=1 SV=1	2	44	M.(S)[Acetyl]DKPNLEEVTSFDKTKLKKTETQEKNPLPSKETIEQEKQAGSS.	4887.52	No match		15040000
sp|Q6PC60|H2B3_DANRE	Histone H2B 3 OS=Danio rerio OX=7955 GN=hist2h2l PE=2 SV=3	88	111	R.STITSREIQTAVRLLLPGELAKHA.V	2603.49	No match		15170000
tr|Q803Q7|Q803Q7_DANRE	Fructose-bisphosphate aldolase OS=Danio rerio OX=7955 GN=aldoaa PE=1 SV=1	1	42	.(MPH)[-119.0222]AYPFLTPEQKKELSDIAQRIVAPGKGILAADESTGSVAK.R	4344.35	No match		13340000
tr|E7EXD7|E7EXD7_DANRE	Histone H2A OS=Danio rerio OX=7955 GN=si:ch211-113a14.19 PE=3 SV=1	83	128	R.HLQLAVRNDEELNKLLGGVTIAQGGVLPNIQAVLL(PKKTEKAAKGK)[-455.2780].	4416.55	No match		80310000
tr|B3DFP9|B3DFP9_DANRE	Apolipoprotein A-II OS=Danio rerio OX=7955 GN=apoa2 PE=1 SV=1	22	141	E.(WPVPDKELVDKYDGLRTVFIKRLVNAWEKIK)[240.0784]TAVEPALEGSPTAGSLKDVVEELKKSPRVESFIKIAGGLASELEPVVDKARLNALGVYGHYFRPYVGAYLDSAINNVKPVLDTVLPQGN.	13423.3	No match		326800000
tr|E9QDI1|E9QDI1_DANRE	Apolipoprotein C-I OS=Danio rerio OX=7955 GN=apoc1 PE=1 SV=1	22	85	A.QE(E)[-17.0048]PTLEQHFTKFGTQMKEIAEDLADKTKTAFQNIEQSELGTKTRNWFNDQYEKLKQKMTETFN.	7623.73	No match		343500000
tr|E7F0U0|E7F0U0_DANRE	Myelin basic protein OS=Danio rerio OX=7955 GN=mbpa PE=1 SV=2	48	72	L.SSS(PQRPHHSSTRR)[2.9673]RGDVNPVVHFF.R	2889.42	No match		25060000
tr|Q9I8U7|Q9I8U7_DANRE	Fast skeletal muscle myosin light polypeptide 3 OS=Danio rerio OX=7955 GN=mylz3 PE=1 SV=1	48	151	K.DVKKILGDPSADDMANKRIDFEAFLPMLKTVDANQKGTYDDYVEGLRVFDKEGNGTVMGAELRIVLSTLGEKMSEPEIDALMQGQEDENGMVHYEAFVKNIMSV.	11569.6	No match		53510000
tr|Q804W0|Q804W0_DANRE	Parvalbumin 1 OS=Danio rerio OX=7955 GN=pvalb1 PE=1 SV=1	2	109	M.(A)[Acetyl]VGALLAAADVDAALAACQAADSFDYKSFFAKVGLSAKSADEVKKAFAIIDQDNSGFIEEEELKLFLQNFKANARVLTDKETKAFLSAGDSDGDGKIGAEEFAALVKA.	11331.8	No match		91330000
tr|Q6P0T7|Q6P0T7_DANRE	Tnnt3b protein OS=Danio rerio OX=7955 GN=tnnt3b PE=1 SV=1	2	37	M.(S)[Acetyl]DTEDVGVEEEKPKFKPSAPKIPDGDKVDFDDIQKK.R	4072.04	No match		159200000
tr|B8JM34|B8JM34_DANRE	ATP synthase-coupling factor 6, mitochondrial OS=Danio rerio OX=7955 GN=atp5pf PE=1 SV=1	66	109	D.AGPVYQKNLAEETTKLQRLYGGGDLSKFPQFSFTEPKLDETTTK.	4931.55	No match		10320000
tr|Q9I8U7|Q9I8U7_DANRE	Fast skeletal muscle myosin light polypeptide 3 OS=Danio rerio OX=7955 GN=mylz3 PE=1 SV=1	2	76	M.(A)[Acetyl]GEFTADQIEDFKEAFGLFDRVGDSKVAYNQVADIMRALGQNPTNKDVKKILGDPSADDMANKRIDFEAFLPMLK.T	8376.21	No match		1608000000
tr|Q9I8U7|Q9I8U7_DANRE	Fast skeletal muscle myosin light polypeptide 3 OS=Danio rerio OX=7955 GN=mylz3 PE=1 SV=1	2	76	M.(A)[58.1066]GEFTADQIEDFKEAFGLFDRVGDSKVAYNQVADIMRALGQNPTNKDVKKILGDPSADDMANKRIDFEAFLPMLK.T	8392.2	No match		363400000
tr|G1K2V1|G1K2V1_DANRE	Histone H2B OS=Danio rerio OX=7955 GN=zgc:173585 PE=3 SV=1	57	84	K.AMGIMNSFVNDIFERIAGEASRLAHYNK.R	3153.57	No match		140600000
tr|A0A2R8QTL0|A0A2R8QTL0_DANRE	Myosin light chain, phosphorylatable, fast skeletal muscle a OS=Danio rerio OX=7955 GN=mylpfa PE=1 SV=1	32	105	K.EAFTIIDQNRDGIISKDDLRDVLASMGQLNVKNEELEAMIKEASGPINFTVFLTMFGEKLKGADPEDVIVSAFK.V	8170.21	No match		242800000
tr|A0A0R4IVC8|A0A0R4IVC8_DANRE	Cytochrome c oxidase polypeptide Va OS=Danio rerio OX=7955 GN=cox5ab PE=1 SV=1	49	75	F.SKPDLDAWELRKGMNTLIGYDLVPEPK.I	3084.61	No match		36790000
tr|Q9I8U7|Q9I8U7_DANRE	Fast skeletal muscle myosin light polypeptide 3 OS=Danio rerio OX=7955 GN=mylz3 PE=1 SV=1	48	73	K.DVKKILGDPSADDMANKRIDFEAF(L)[388.2261]P.M	3292.7	No match		41540000
tr|Q7ZT36|Q7ZT36_DANRE	Parvalbumin 3 OS=Danio rerio OX=7955 GN=pvalb3 PE=1 SV=1	2	109	M.(A)[Acetyl]FAGILNEADITAALQACQAADSFDYKSFFAKVGLSAKTPDDIKKAFAVIDQDKSGFIEEDELKLFLQNFSAGARALTDAETKAFLKAGDSDGDGKIGVDEFASLVKA.	11452.8	No match		230000000
tr|B8JKH7|B8JKH7_DANRE	Myosin, light polypeptide 3, skeletal muscle (Fragment) OS=Danio rerio OX=7955 GN=mylz3 PE=1 SV=1	72	100	K.DVKKILGDPSADDMANKRIDFEAFLPMLK.T	3276.71	No match		178900000
tr|Q8AY63|Q8AY63_DANRE	Creatine kinase OS=Danio rerio OX=7955 GN=ckbb PE=1 SV=1	106	130	K.HKTDLNPDNLKGGDDLDPNYVLSSR.V	2782.37	No match		209900000
tr|F1QTL1|F1QTL1_DANRE	Histone H2A OS=Danio rerio OX=7955 GN=hist1h2a11 PE=3 SV=2	37	77	R.KGNYAERVGAGAPVYLAAVLEYLTAEILELAGNAARDNKKT.R	4318.32	No match		13150000
tr|B8JKH7|B8JKH7_DANRE	Myosin, light polypeptide 3, skeletal muscle (Fragment) OS=Danio rerio OX=7955 GN=mylz3 PE=1 SV=1	75	100	K.KILGDPSADDMANKRIDFEAFLPMLK.T	2934.52	No match		9829000
tr|A2BHA3|A2BHA3_DANRE	Creatine kinase OS=Danio rerio OX=7955 GN=ckma PE=1 SV=1	106	130	K.(H)[-52.0194]KTDLNFENLKGGDDLDPNYVLSSR.V	2794.37	No match		4419000
tr|Q7T334|Q7T334_DANRE	Malate dehydrogenase OS=Danio rerio OX=7955 GN=mdh2 PE=1 SV=1	157	184	K.HGVYNPNKIFGVTTLDIVRANTFVAELK.G	3115.71	No match		1256000
tr|E7EZX1|E7EZX1_DANRE	Histone H2A OS=Danio rerio OX=7955 GN=hist1h2a5 PE=3 SV=1	1	76	.(M)[Acetyl]SGRGKTGGKTRAKAKTRSSRAGLQFPVGRVHRLLRKGNYAQRVGAGAPVYL(A)[277.1607]AVLEYLTAEILELAGNAARDNKK.T	8438.52	No match		29860000
tr|Q9I8U7|Q9I8U7_DANRE	Fast skeletal muscle myosin light polypeptide 3 OS=Danio rerio OX=7955 GN=mylz3 PE=1 SV=1	2	93	M.(A)[Acetyl]GEFTADQIEDFKEAFGLFDRVGDSKVAYNQVADIMRALGQNPTNKDVKKILGDPSADDMANKRIDFEAFLPMLKTVDANQKGTYDDYVEGL.R	10245.1	No match		77890000
sp|Q6NWH2|MRPB_DANRE	MARCKS-related protein 1-B OS=Danio rerio OX=7955 GN=marcksl1b PE=2 SV=1	1	95	.(MGSQASKGGVAVEGKAAAADPAAVKTNGQENG)[82.1303]HVKTNGDVSAKAEGDAATTNGSAEAAKESEAGAGDAIEPAPAAEGEAAKPEGEATKETPKKKK.K	9207.61	No match		160700000
tr|Q4VBV1|Q4VBV1_DANRE	Cytochrome b-c1 complex subunit 7 OS=Danio rerio OX=7955 GN=uqcrb PE=1 SV=1	30	61	K.LGLMRDDTIDEGSDVKEAVRRLPEPLYNERVF.R	3731.92	No match		11210000
tr|Q08BA1|Q08BA1_DANRE	ATP synthase subunit alpha OS=Danio rerio OX=7955 GN=atp5fa1 PE=1 SV=1	140	169	V.(PV)[27.9424]GEELLGRVVDALGNPIDGKGPLGSKERR.R	3155.56	No match		1447000
tr|Q9I8U7|Q9I8U7_DANRE	Fast skeletal muscle myosin light polypeptide 3 OS=Danio rerio OX=7955 GN=mylz3 PE=1 SV=1	2	51	M.(A)[Acetyl]GEFTADQIEDFKEAFGLFDRVGDSKVAYNQVADIMRALGQNPTNKDVKK.I	5586.81	No match		187300000
tr|B8JM34|B8JM34_DANRE	ATP synthase-coupling factor 6, mitochondrial OS=Danio rerio OX=7955 GN=atp5pf PE=1 SV=1	73	109	K.NLAEETTKLQRLYGGGDLSKFPQFSFTEPKLDETTTK.	4189.15	No match		37730000
tr|Q5U3E5|Q5U3E5_DANRE	Transporter OS=Danio rerio OX=7955 GN=slc6a1b PE=1 SV=1	1	36	.(MATNGTKASD)[-88.0417]GHVLTEVNEAPTANDKPKTLVVKVQK.K	3702.96	No match		45960000
sp|Q8JH70|ALDCB_DANRE	Fructose-bisphosphate aldolase C-B OS=Danio rerio OX=7955 GN=aldocb PE=2 SV=1	2	31	M.(T)[Acetyl]HQYPALTAEQKKELQDIAQRIVAPGKGIL.A	3356.86	No match		1893000
sp|Q5PRD0|143BA_DANRE	14-3-3 protein beta/alpha-A OS=Danio rerio OX=7955 GN=ywhaba PE=2 SV=2	1	27	.(M)[Acetyl]DKSDLVQKAKLAEQAERYDDMAASMK.A	3113.5	No match		44480000
tr|Q6ZM17|Q6ZM17_DANRE	Novel protein similar to zebrafish hemoglobin alpha-adult 1 (Hbaa1) OS=Danio rerio OX=7955 GN=si:ch211-5k11.8 PE=1 SV=1	2	28	M.(S)[Acetyl]LSDKDKAVVKAIWAKISPKADEIGAE.A	2910.59	No match		8162000
sp|Q7ZWE9|KCY_DANRE	UMP-CMP kinase OS=Danio rerio OX=7955 GN=cmpk PE=2 SV=2	172	196	K.VQRIDASRSVDEVFADVKNILEKDD.	2860.47	No match		9217000
tr|Q6DGT8|Q6DGT8_DANRE	Protein S100-B OS=Danio rerio OX=7955 GN=s100b PE=1 SV=1	30	62	K.KSELKELLTHEFPTLTEQVKDQATMDSL(ME)[232.5087]SLD.T	4038.25	No match		12090000
tr|F6NIF4|F6NIF4_DANRE	Creatine kinase (Fragment) OS=Danio rerio OX=7955 GN=ckbb PE=1 SV=1	2	39	M.P(FGNTHNLLK)[-282.8665]MNYSAEQEYPDLTKHNNHMAKVLTPEMY.A	4192.12	No match		8185000
tr|Q6ZM17|Q6ZM17_DANRE	Novel protein similar to zebrafish hemoglobin alpha-adult 1 (Hbaa1) OS=Danio rerio OX=7955 GN=si:ch211-5k11.8 PE=1 SV=1	2	40	M.(S)[Acetyl]LSDKDKAVVKAIWAKISPKADEIGAEALARMLTVYPQT.K	4255.32	No match		42110000
tr|B8JM34|B8JM34_DANRE	ATP synthase-coupling factor 6, mitochondrial OS=Danio rerio OX=7955 GN=atp5pf PE=1 SV=1	81	109	K.LQRLYGGGDLSKFPQFSFTEPKLDETTTK.	3302.7	No match		15450000
sp|Q7ZUY3|H2AX_DANRE	Histone H2AX OS=Danio rerio OX=7955 GN=h2ax PE=2 SV=3	83	104	R.HLQLAVRNDEELNKLLGGVTIA.Q	2402.34	No match		17510000
tr|Q6ZM17|Q6ZM17_DANRE	Novel protein similar to zebrafish hemoglobin alpha-adult 1 (Hbaa1) OS=Danio rerio OX=7955 GN=si:ch211-5k11.8 PE=1 SV=1	2	30	M.(S)[Acetyl]LSDKDKAVVKAIWAKISPKADEIGAEAL.A	3094.71	No match		14340000
tr|E9QDI4|E9QDI4_DANRE	Troponin T type 3b (skeletal, fast) (Fragment) OS=Danio rerio OX=7955 GN=tnnt3b PE=1 SV=2	2	41	M.(S)[Acetyl]DTEDVGVEEYDEEEKPKFKPSAPKIPDGDKVDFDDIQKK.R	4608.22	No match		209800000
tr|Q6ZM17|Q6ZM17_DANRE	Novel protein similar to zebrafish hemoglobin alpha-adult 1 (Hbaa1) OS=Danio rerio OX=7955 GN=si:ch211-5k11.8 PE=1 SV=1	2	31	M.(S)[Acetyl]LSDKDKAVVKAIWAKISPKADEIGAEALA.R	3165.75	No match		59900000
sp|Q7ZUY3|H2AX_DANRE	Histone H2AX OS=Danio rerio OX=7955 GN=h2ax PE=2 SV=3	55	76	A.VLEYLTAEILELAGNAARDNKK.T	2430.32	No match		1415000
tr|Q9I8U7|Q9I8U7_DANRE	Fast skeletal muscle myosin light polypeptide 3 OS=Danio rerio OX=7955 GN=mylz3 PE=1 SV=1	2	64	M.(A)[Acetyl]GEFTADQIEDFKEAFGLFDRVGDSKVAYNQVADIMRALGQNPTNKDVKKILGDPSADDMANK.R	6915.41	No match		994300000
tr|A0A2R8RZK5|A0A2R8RZK5_DANRE	Tubulin alpha chain OS=Danio rerio OX=7955 GN=tuba1c PE=3 SV=1	54	83	F.SETGAGKHVPRAVFVDLEPTVIDEVRTGTY.R	3241.67	No match		8387000
tr|Q9I8U7|Q9I8U7_DANRE	Fast skeletal muscle myosin light polypeptide 3 OS=Danio rerio OX=7955 GN=mylz3 PE=1 SV=1	2	64	M.(A)[Acetyl]GEFTADQIEDFKEAFGLFDRVGDSKVAYNQVAD(IMRALGQNPTNKD)[16.0145]VKKILGDPSADDMANK.R	6931.4	No match		227900000
tr|Q5CZQ1|Q5CZQ1_DANRE	Tyrosine 3-monooxygenase/tryptophan 5-monooxygenase activation protein, epsilon polypeptide 2 OS=Danio rerio OX=7955 GN=ywhae2 PE=1 SV=1	29	50	K.NVAGKDEDLSVEERNLLSVAYK.N	2447.26	No match		988500
sp|O57521|HS90B_DANRE	Heat shock protein HSP 90-beta OS=Danio rerio OX=7955 GN=hsp90ab1 PE=1 SV=2	284	305	K.TKPIWTRNPDDISNEEYGEFYK.S	2701.28	No match		13880000
sp|Q90487|HBA_DANRE	Hemoglobin subunit alpha OS=Danio rerio OX=7955 GN=hbaa1 PE=2 SV=3	2	32	M.(S)[Acetyl]LSDTDKAVVKAIWAKISPKADEIGAEALAR.M	3294.8	No match		44180000
tr|F1RCH5|F1RCH5_DANRE	Cytochrome c oxidase polypeptide Vb OS=Danio rerio OX=7955 GN=zgc:86599 PE=1 SV=1	30	53	M.AAGGIPTDEEQATGLEKKIMTALK.T	2470.3	No match		6404000
sp|Q8JH70|ALDCB_DANRE	Fructose-bisphosphate aldolase C-B OS=Danio rerio OX=7955 GN=aldocb PE=2 SV=1	2	34	M.(T)[Acetyl]HQYPALTAEQKKELQDIAQRIVAPGKGILAAD.E	3614.96	No match		13900000
sp|Q7ZUY3|H2AX_DANRE	Histone H2AX OS=Danio rerio OX=7955 GN=h2ax PE=2 SV=3	83	105	R.HLQLAVRNDEELNKLLGGVTIAQ.G	2530.4	No match		51470000
tr|A0A0R4IJ10|A0A0R4IJ10_DANRE	Sodium/potassium-transporting ATPase subunit alpha OS=Danio rerio OX=7955 GN=atp1a1b PE=1 SV=2	166	197	K.NLVPQQALVVRDGEKNHVNAEEVVVGDLVEVK.G	3495.89	No match		73050000
tr|E7EZX1|E7EZX1_DANRE	Histone H2A OS=Danio rerio OX=7955 GN=hist1h2a5 PE=3 SV=1	83	128	R.HLQLAVRNDEELNKLLGGVTIA(QGGVLPNIQAVLLPKKTEKATKGK)[273.2125].	5174.88	No match		3814000
tr|A0A2R8RZK5|A0A2R8RZK5_DANRE	Tubulin alpha chain OS=Danio rerio OX=7955 GN=tuba1c PE=3 SV=1	53	83	F.FSETGAGKHVPRAVFVDLEPTVIDEVRTGTY.R	3390.73	No match		1896000
sp|Q7ZUY3|H2AX_DANRE	Histone H2AX OS=Danio rerio OX=7955 GN=h2ax PE=2 SV=3	44	78	R.VGAGAPVYLAAVLEYLTAEILELAGNAARDNKKTR.I	3658.01	No match		3026000
tr|A0A0G2KK99|A0A0G2KK99_DANRE	Zinc finger protein 977 OS=Danio rerio OX=7955 GN=znf977 PE=4 SV=1	1	29	.MAFIK(EESE)[317.3967]DVKIEETFSVKQEDLQEQTG.	3703.95	No match		70090000
sp|Q90487|HBA_DANRE	Hemoglobin subunit alpha OS=Danio rerio OX=7955 GN=hbaa1 PE=2 SV=3	2	34	M.(S)[Acetyl]LSDTDKAVVKAIWAKISPKADEIGAEALARML.T	3538.93	No match		12700000
sp|Q7ZUY3|H2AX_DANRE	Histone H2AX OS=Danio rerio OX=7955 GN=h2ax PE=2 SV=3	83	106	R.HLQLAVRNDEELNKLLGGVTIAQG.G	2586.42	No match		436500
tr|Q66I73|Q66I73_DANRE	Myosin light chain, phosphorylatable, fast skeletal muscle b OS=Danio rerio OX=7955 GN=mylpfb PE=1 SV=1	2	32	M.((A)[Acetyl]PKKAKKRQQAEGGSSNVFSM)[-749.4690]FEQSQIQEYK.E	2821.32	No match		12790000
tr|E9QG51|E9QG51_DANRE	Myosin light chain, phosphorylatable, fast skeletal muscle b (Fragment) OS=Danio rerio OX=7955 GN=mylpfb PE=1 SV=1	1	11	.(M)[-25.9443]FEQSQIQEYK.E	1403.67	No match		265700
tr|B8JM34|B8JM34_DANRE	ATP synthase-coupling factor 6, mitochondrial OS=Danio rerio OX=7955 GN=atp5pf PE=1 SV=1	86	109	Y.(GG)[4.1679]GDLSKFPQFSFTEPKLDETTTK.	2633.38	No match		5565000
tr|Q568Q7|Q568Q7_DANRE	Stathmin OS=Danio rerio OX=7955 GN=stmn1b PE=1 SV=1	12	43	K.ELDKRASGQAFEVILSPTAPDAKGEFPLSTPK.K	3398.79	No match		3731000
sp|Q90487|HBA_DANRE	Hemoglobin subunit alpha OS=Danio rerio OX=7955 GN=hbaa1 PE=2 SV=3	18	41	K.ISPKADEIGAEALAR(M)[16.0053]LTVYPQTK.T	2617.4	No match		13770000
tr|E9QFA6|E9QFA6_DANRE	Cytochrome c oxidase subunit 8A OS=Danio rerio OX=7955 GN=cox8a PE=3 SV=1	19	76	R.GSTITQRANLVTRPAKEALGPV(ETTAALA)[-51.2876]IFTLAILGPAGWVLSNLENYKKRDSVESE.	6114.98	No match		28470000
sp|Q7ZVF9|ACTB2_DANRE	Actin, cytoplasmic 2 OS=Danio rerio OX=7955 GN=actbb PE=1 SV=2	92	113	Y.NELRVAPEEH(PV)[14.9957]LLTEAPLNPK.A	2480.33	No match		681300
tr|E9QFA6|E9QFA6_DANRE	Cytochrome c oxidase subunit 8A OS=Danio rerio OX=7955 GN=cox8a PE=3 SV=1	28	76	N.LVTRPAKEALGPVETTAALAIFTLAILGPAGWVLSNLENYKKRDSVESE.	5237.88	No match		38860000
tr|Q4VBU7|Q4VBU7_DANRE	Cytochrome c oxidase polypeptide Va OS=Danio rerio OX=7955 GN=cox5aa PE=1 SV=1	107	141	K.AGPHKEIYPYVIQELRPTLDELGIATPEELGIDKA.	3874.06	No match		2097000
tr|Q9I8U7|Q9I8U7_DANRE	Fast skeletal muscle myosin light polypeptide 3 OS=Danio rerio OX=7955 GN=mylz3 PE=1 SV=1	2	50	M.(A)[Acetyl]GEFTADQIEDFKEAFGLFDRVGDSKVAYNQVADIMRALGQNPTNKDVK.K	5459.71	No match		24890000
tr|Q642J0|Q642J0_DANRE	Histidine triad nucleotide-binding protein 1 OS=Danio rerio OX=7955 GN=hint1 PE=1 SV=1	2	25	M.(A)[Acetyl]DEVSRAQSAQPGGDTIFGKIIRK.E	2585.37	No match		8200000
tr|Q9I8U7|Q9I8U7_DANRE	Fast skeletal muscle myosin light polypeptide 3 OS=Danio rerio OX=7955 GN=mylz3 PE=1 SV=1	2	50	M.(A)[Acetyl]GEFTADQIEDFKEAFGLFDRVGDSKVAYNQV(ADIMRALGQNPTNKD)[16.0128]VK.K	5475.71	No match		22600000
tr|B8JM34|B8JM34_DANRE	ATP synthase-coupling factor 6, mitochondrial OS=Danio rerio OX=7955 GN=atp5pf PE=1 SV=1	86	109	Y.GGGDLSKFPQFSFTEPKLDETTTK.	2629.31	No match		30260000
tr|E7F9R1|E7F9R1_DANRE	Sodium/potassium-transporting ATPase subunit beta OS=Danio rerio OX=7955 GN=atp1b4 PE=1 SV=1	1	23	.(M)[Acetyl]ERDSTAGGAEDLLLEDKVSKLR.A	2574.31	No match		3467000
tr|A0A2R8QF52|A0A2R8QF52_DANRE	Cytochrome c oxidase polypeptide Vb OS=Danio rerio OX=7955 GN=cox5b1 PE=1 SV=1	31	55	L.ASGGIPTDDEQATGLERIVMEASKK.G	2601.31	No match		1664000
tr|Q08BA1|Q08BA1_DANRE	ATP synthase subunit alpha OS=Danio rerio OX=7955 GN=atp5fa1 PE=1 SV=1	133	168	R.TGAIVDVPVGEELLGRVVDALGNPIDGKGPLGSKER.R	3626.99	No match		29910000
tr|E9QJI6|E9QJI6_DANRE	2-phospho-D-glycerate hydro-lyase (Fragment) OS=Danio rerio OX=7955 GN=eno3 PE=1 SV=1	2	25	M.(S)[Acetyl]ISKIHAREILDSRGNPTVEVDLY.T	2753.46	No match		5241000
tr|A0A2R8RJJ2|A0A2R8RJJ2_DANRE	Zgc:86709 OS=Danio rerio OX=7955 GN=actc2 PE=3 SV=1	94	117	Y.NELRVAPEEHPTLLTEAPLNPKAN.R	2652.41	No match		16480000
tr|Q6P5L5|Q6P5L5_DANRE	NADH dehydrogenase [ubiquinone] 1 beta subcomplex subunit 8, mitochondrial OS=Danio rerio OX=7955 GN=ndufb8 PE=1 SV=1	71	95	D.GWGSGDYPMLPSRSQHERDPYYQWD.H	3026.33	No match		3027000
tr|E9QDI4|E9QDI4_DANRE	Troponin T type 3b (skeletal, fast) (Fragment) OS=Danio rerio OX=7955 GN=tnnt3b PE=1 SV=2	2	40	M.(S)[Acetyl]DTEDVGVEEYDEEEKPKFKPSAPKIPDGDKVDFDDIQK.K	4480.13	No match		72570000
tr|A0A2R8Q2N5|A0A2R8Q2N5_DANRE	Myosin, heavy polypeptide 1.2, skeletal muscle OS=Danio rerio OX=7955 GN=myhz1.2 PE=3 SV=1	1504	1528	K.NLQQEISDLTEQIGETGKSIHELEK.S	2838.45	No match		24030000
sp|Q6NWH2|MRPB_DANRE	MARCKS-related protein 1-B OS=Danio rerio OX=7955 GN=marcksl1b PE=2 SV=1	117	207	K.NAEVKEEAAAAAPATEEKPEENGAATEEKKEEEAKAEETPAAPVETPKAEEPAAKAEEPAAAKEEAAAPAVEATKQTEETNSTPAPSEQKE.	9407.51	No match		27060000
tr|Q8AY63|Q8AY63_DANRE	Creatine kinase OS=Danio rerio OX=7955 GN=ckbb PE=1 SV=1	106	129	K.HKTDLNPDNLKGGDDLDPNYVLSS.R	2626.27	No match		13550000
tr|A0A2R8PZU6|A0A2R8PZU6_DANRE	Reticulon OS=Danio rerio OX=7955 GN=rtn4a PE=1 SV=1	67	111	R.STMPRKEEPLLDFGEPEPEPSSTIKPEPEAPKPAPISSFGDASPK.Q	4817.42	No match		1189000
tr|A2BGX6|A2BGX6_DANRE	Myosin heavy chain 4 OS=Danio rerio OX=7955 GN=myhc4 PE=1 SV=1	1534	1559	K.TVETEKAEIQTALEEAEGTLEHEESK.I	2900.4	No match		1601000
tr|B8JM34|B8JM34_DANRE	ATP synthase-coupling factor 6, mitochondrial OS=Danio rerio OX=7955 GN=atp5pf PE=1 SV=1	85	109	L.YGGGDLSKFPQFSFTEPKLDETTTK.	2792.37	No match		2083000
tr|F1R8W4|F1R8W4_DANRE	Desmin a OS=Danio rerio OX=7955 GN=desma PE=1 SV=1	448	473	K.TVLIKTIETRDGEVVSESTQHQQDVM.	2942.48	No match		1217000
tr|A0A0G2KJE9|A0A0G2KJE9_DANRE	Non-specific serine/threonine protein kinase OS=Danio rerio OX=7955 GN=trpm6 PE=4 SV=2	2	47	M.SRCTWIQATFCKRECVRFLPASRDHH(RCYPVCQVCQSLVRC)[-250.0335]CCGRL.I	5166.51	No match		5367000
tr|A8WGC6|A8WGC6_DANRE	ATP synthase subunit beta OS=Danio rerio OX=7955 GN=atp5f1b PE=1 SV=1	114	150	K.VLDTGAPIRIPVGPET(LGRIMNVI)[16.0112]GEPIDERGPISTK.Q	3926.16	No match		39570000
tr|Q9I8U7|Q9I8U7_DANRE	Fast skeletal muscle myosin light polypeptide 3 OS=Danio rerio OX=7955 GN=mylz3 PE=1 SV=1	77	101	K.TVDANQKGTYDDYVEGLRVFDKEGN.G	2832.34	No match		1031000
sp|Q7ZVF9|ACTB2_DANRE	Actin, cytoplasmic 2 OS=Danio rerio OX=7955 GN=actbb PE=1 SV=2	92	115	Y.NELRVAPEEHPVLLTEAPLNPKAN.R	2650.43	No match		5062000
tr|Q6ZM23|Q6ZM23_DANRE	Cytochrome c oxidase subunit 6C OS=Danio rerio OX=7955 GN=cox6c PE=1 SV=1	51	76	Y.TQYDSTKEFNAMREAGIFESARPSGE.	2920.35	No match		35860000
tr|Q6ZM23|Q6ZM23_DANRE	Cytochrome c oxidase subunit 6C OS=Danio rerio OX=7955 GN=cox6c PE=1 SV=1	51	76	Y.TQYD(STKEFNAMREAG)[16.0086]IFESARPSGE.	2936.35	No match		7615000
tr|E7EXD7|E7EXD7_DANRE	Histone H2A OS=Danio rerio OX=7955 GN=si:ch211-113a14.19 PE=3 SV=1	37	75	R.KGNYAERVGAGAPV(Y)[16.0052]LAAVLEYLTAEILELAGNAARDNK.K	4106.17	No match		23800000
tr|A8WGC6|A8WGC6_DANRE	ATP synthase subunit beta OS=Danio rerio OX=7955 GN=atp5f1b PE=1 SV=1	114	150	K.VLDTGAPIRIPVGPETLGRIMNVIGEPIDERGPISTK.Q	3910.17	No match		27130000
tr|Q7SZP4|Q7SZP4_DANRE	Zgc:65851 OS=Danio rerio OX=7955 GN=zgc:65851 PE=1 SV=1	63	90	R.SKLASGRGAFQPDNVDLTQTTAITNELK.I	2974.56	No match		9473000
tr|Q6NVI6|Q6NVI6_DANRE	Chaperonin-containing TCP1, subunit 5 (epsilon) OS=Danio rerio OX=7955 GN=cct5 PE=1 SV=1	2	25	M.(S)[Acetyl]ALGTLAFDEYGRPFIIIKDQDKK.S	2766.48	No match		498900
tr|Q6ZM23|Q6ZM23_DANRE	Cytochrome c oxidase subunit 6C OS=Danio rerio OX=7955 GN=cox6c PE=1 SV=1	63	76	M.(REAGI)[-36.5137]FESARPSGE.	1468.17	No match		1007000
tr|B8JM34|B8JM34_DANRE	ATP synthase-coupling factor 6, mitochondrial OS=Danio rerio OX=7955 GN=atp5pf PE=1 SV=1	84	109	R.LYGGGDLSKFPQFSFTEPKLDETTTK.	2905.46	No match		4576000
tr|A0A2R8QFM8|A0A2R8QFM8_DANRE	Dihydropyrimidinase-related protein 2 OS=Danio rerio OX=7955 GN=dpysl2b PE=1 SV=1	208	234	R.ILDLGITGPEGHVLSRPEEVEAEAVNR.S	2899.52	No match		7249000
sp|Q90487|HBA_DANRE	Hemoglobin subunit alpha OS=Danio rerio OX=7955 GN=hbaa1 PE=2 SV=3	2	56	M.(S)[Acetyl]LSDTDKAVVKAIWAKISPKADEIGAEALARMLTVYPQT(KTYFSHWADLSPGSGP)[-38.0928].V	5920.78	No match		380600
tr|A0A2R8Q5P5|A0A2R8Q5P5_DANRE	Adducin 3 (gamma) a OS=Danio rerio OX=7955 GN=add3a PE=1 SV=1	2	37	M.(S)[Acetyl]GEPRQEVVTTPPPPSVGKREGYFDRVNENDPEYLR.A	4156.05	No match		4730000
sp|P17561|EPD_DANRE	Ependymin OS=Danio rerio OX=7955 GN=epd PE=2 SV=2	109	136	K.HLMEIP(VD)[16.0035]ATHESESYMGSPSLTEQGLR.V	3129.46	No match		51050000
sp|Q5PRD0|143BA_DANRE	14-3-3 protein beta/alpha-A OS=Danio rerio OX=7955 GN=ywhaba PE=2 SV=2	1	26	.(M)[Acetyl]DKSDLVQKAKLAEQAERYDDMAASM.K	2985.41	No match		415200
tr|Q6P5L5|Q6P5L5_DANRE	NADH dehydrogenase [ubiquinone] 1 beta subcomplex subunit 8, mitochondrial OS=Danio rerio OX=7955 GN=ndufb8 PE=1 SV=1	162	188	K.QYPYNNLYLERGGDPEKEPEPVKNYEI.	3253.58	No match		10770000
sp|Q7ZUY3|H2AX_DANRE	Histone H2AX OS=Danio rerio OX=7955 GN=h2ax PE=2 SV=3	83	112	R.HLQLAVRNDEELNKLLGGVTIAQGGVLPNI.Q	3179.78	No match		419800
tr|A0A2R8RZC0|A0A2R8RZC0_DANRE	Polypeptide N-acetylgalactosaminyltransferase 17 OS=Danio rerio OX=7955 GN=galnt17 PE=4 SV=1	165	192	T.ATLHPCHGWGPQLGRYTKEGYLFLGPLG.S	3066.54	No match		533900
sp|P17561|EPD_DANRE	Ependymin OS=Danio rerio OX=7955 GN=epd PE=2 SV=2	109	136	K.HLMEIPVDATHESESYMGSPSLTEQGLR.V	3113.47	No match		39950000
tr|A0A2R8Q2Z0|A0A2R8Q2Z0_DANRE	Ependymin OS=Danio rerio OX=7955 GN=epd PE=1 SV=1	109	136	K.HL(MEI)[15.9921]PVDATHESESY(M)[16.0058]GSPSLTEQGLR.V	3145.46	No match		23840000
tr|A0JMK6|A0JMK6_DANRE	Secretogranin II OS=Danio rerio OX=7955 GN=scg2b PE=2 SV=1	537	583	R.DTQGKEEPEGPQKPPAQDPAQETVDQTPPESGTEDGKEYHGKIVAGM.	5001.33	No match		2658000
tr|F6NUZ4|F6NUZ4_DANRE	Enolase 2 OS=Danio rerio OX=7955 GN=eno2 PE=1 SV=1	2	28	M.(S)[Acetyl]VVSIIAREILDSRGNPTVEVDLRTDK.G	3023.65	No match		14480000
tr|Q7T334|Q7T334_DANRE	Malate dehydrogenase OS=Danio rerio OX=7955 GN=mdh2 PE=1 SV=1	45	73	K.NSPLVSELSLFDIAHTPGVAADLSHIETR.A	3088.61	No match		19270000
tr|F1R446|F1R446_DANRE	Spectrin alpha, non-erythrocytic 1 OS=Danio rerio OX=7955 GN=sptan1 PE=1 SV=1	1	26	.(M)[Acetyl]DISGVKVLETADDIQERRQQVLDRY.R	3118.59	No match		2043000
sp|Q7ZUY3|H2AX_DANRE	Histone H2AX OS=Danio rerio OX=7955 GN=h2ax PE=2 SV=3	83	114	R.HLQLAVRNDEELNKLL(GGVTI)[14.9996]AQGGVLPNIQA.V	3394.87	No match		8892000
tr|A0A0G2KGN6|A0A0G2KGN6_DANRE	Uncharacterized protein OS=Danio rerio OX=7955 GN=LOC108191765 PE=4 SV=2	429	455	V.TVLDQNDHPPEFNENFLEKTMIIGAPV.K	3068.54	No match		121300
tr|Q9I8U7|Q9I8U7_DANRE	Fast skeletal muscle myosin light polypeptide 3 OS=Danio rerio OX=7955 GN=mylz3 PE=1 SV=1	2	47	M.(A)[Acetyl]GEFTADQIEDFKEAFGLFDRVGDSKVAYNQVAD(IMRAL)[32.0102]GQNPTNK.D	5149.51	No match		52980000
tr|F6NUZ4|F6NUZ4_DANRE	Enolase 2 OS=Danio rerio OX=7955 GN=eno2 PE=1 SV=1	2	31	M.(S)[Acetyl]VVSIIAREILDSRGNPTVEVDLRTDKGLF.R	3340.83	No match		19030000
tr|Q568Q7|Q568Q7_DANRE	Stathmin OS=Danio rerio OX=7955 GN=stmn1b PE=1 SV=1	2	43	M.(A)[Acetyl]SSGADIQVKELDKRASGQAFEVILSPTAPDAKGEFPLSTPK.K	4397.31	No match		18290000
tr|Q6P271|Q6P271_DANRE	Sodium/potassium-transporting ATPase subunit alpha OS=Danio rerio OX=7955 GN=atp1a3a PE=1 SV=1	163	194	K.(NM)[16.0055]VPQQALVIREGEKLQINAEEVVGGDLVEVK.G	3519.89	No match		6979000
tr|F1RC41|F1RC41_DANRE	Solute carrier family 12 member 10, tandem duplicate 3 OS=Danio rerio OX=7955 GN=slc12a10.3 PE=3 SV=1	78	106	V.RFGWVLGVMIRCMLNIWGVIMFLRLPWIT.S	3520.89	No match		353800
tr|X1WEA1|X1WEA1_DANRE	Si:ch211-107e6.6 OS=Danio rerio OX=7955 GN=si:ch211-107e6.6 PE=4 SV=1	1	38	.(M)[Acetyl]ETVSVTQVYYEITSKKTGIGLIMTHDELITTT(DSYLL)[286.1127].	4621.26	No match		3870000
tr|Q45NF8|Q45NF8_DANRE	Pcp4a OS=Danio rerio OX=7955 GN=pcp4a PE=1 SV=1	2	43	M.(S)[Acetyl]ERQESGSAGSIKPSGGQDPSKKDVPAEDFDIDMGAPETEKA.A	4389.06	No match		349200
tr|Q6IQX2|Q6IQX2_DANRE	Collagen, type I, alpha 2 OS=Danio rerio OX=7955 GN=col1a2 PE=1 SV=1	1068	1107	P.GHRGPAGHVGPA(GPPGSPGLPGPPG)[6.9708]PSGGGYDTSGGYDEY.R	3691.65	No match		5190000
sp|Q6PI52|CALM_DANRE	Calmodulin OS=Danio rerio OX=7955 GN=calm1a PE=2 SV=3	2	149	M.(A)[Acetyl]DQLTEEQIAEFKEAFSLFDKDGDGTITTKELGTVMRSLGQNPTEAELQDMINE(VDADGNGTIDFPEFLTMMARKMKDTDSEEEIREAFRVFDKDGNGYISAAELRHVMTNLGEKLTDEEVDEMIREADIDGDGQVNY)[40.7078]EEFVQMMTAK.	16778	No match		5157000
sp|Q7ZUY3|H2AX_DANRE	Histone H2AX OS=Danio rerio OX=7955 GN=h2ax PE=2 SV=3	87	119	L.AVRNDEELNKLLGGVTIAQGGVLPNIQAVLLPK.K	3438.98	No match		2629000
tr|Q08BA1|Q08BA1_DANRE	ATP synthase subunit alpha OS=Danio rerio OX=7955 GN=atp5fa1 PE=1 SV=1	52	84	S.SILEEKILGADTGAELEETGRVLSIGDGIARVY.G	3473.85	No match		617700
tr|A0A2R8Q5E7|A0A2R8Q5E7_DANRE	Polycystic kidney disease 1-like 2a OS=Danio rerio OX=7955 GN=pkd1l2a PE=2 SV=1	1426	1458	Q.(VTV)[-21.0187]TLQGSEGESEPHHLTDPEKPVFERGGLDLF.L	3598.82	No match		1587000
tr|E9QDI4|E9QDI4_DANRE	Troponin T type 3b (skeletal, fast) (Fragment) OS=Danio rerio OX=7955 GN=tnnt3b PE=1 SV=2	2	29	M.(S)[Acetyl]DTEDVGVEEYDEEEKPKFKPSAPKIPD.G	3218.52	No match		649000
tr|Q08BA1|Q08BA1_DANRE	ATP synthase subunit alpha OS=Danio rerio OX=7955 GN=atp5fa1 PE=1 SV=1	133	166	R.TGAIVDVPVGEELLGRVVDALGNPIDGKGPLGSK.E	3341.85	No match		15770000
tr|X1WH50|X1WH50_DANRE	Si:ch211-137a8.4 OS=Danio rerio OX=7955 GN=si:ch211-137a8.4 PE=1 SV=1	398	429	K.AADTSGVEEEAAGEQEQTDEPQAGKDPGKTAK.A	3243.49	No match		9395000
tr|Q5XJK2|Q5XJK2_DANRE	Histone H2A OS=Danio rerio OX=7955 GN=h2ax1 PE=2 SV=1	44	76	R.VGAGAPVYLA(A)[16.0013]VLEYLTAEILELAGNAARDNKK.T	3415.87	No match		23350000
tr|A0A2R8PZU6|A0A2R8PZU6_DANRE	Reticulon OS=Danio rerio OX=7955 GN=rtn4a PE=1 SV=1	1	26	.(M)[Acetyl]DDQISSTTPSYDVHHDDEGEFRAEK.Q	3050.31	No match		5724000
tr|Q7T2P7|Q7T2P7_DANRE	Glutamine synthetase OS=Danio rerio OX=7955 GN=glula PE=1 SV=1	335	371	K.GYFE(DRRPSANCDPYAVTEALIRTCLL)[-1.9999]DEEGDETVDY.	4222.9	No match		1012000
tr|Q45NF8|Q45NF8_DANRE	Pcp4a OS=Danio rerio OX=7955 GN=pcp4a PE=1 SV=1	2	32	M.(S)[Acetyl]ERQESGSAGSIKPSGGQDPSKKDVPAEDFD.I	3246.52	No match		2468000
tr|Q1LYN9|Q1LYN9_DANRE	Si:dkey-117n7.4 (Fragment) OS=Danio rerio OX=7955 GN=si:dkey-117n7.4 PE=4 SV=1	478	531	S.GLNGLDGAPGQKGEKGVTGFAGFSGFKGSPGTPGTNGPSGRP(GPVGPKGEMGPK)[-69.1036].	4980.41	No match		3023000
tr|Q8AWD0|Q8AWD0_DANRE	Voltage-dependent anion-selective channel protein 2 OS=Danio rerio OX=7955 GN=vdac2 PE=1 SV=1	164	174	K.MTQNNFAVGYK.T	1271.61	No match		104400
sp|Q7ZUY3|H2AX_DANRE	Histone H2AX OS=Danio rerio OX=7955 GN=h2ax PE=2 SV=3	44	77	R.VGAGAPVYLAAVLEYLTAEILELAGNAARDNKKT.R	3499.91	No match		787100
tr|F1Q763|F1Q763_DANRE	BTB and CNC homology 1, basic leucine zipper transcription factor 1 a OS=Danio rerio OX=7955 GN=bach1a PE=2 SV=2	104	152	L.VRYVSSDCPTSILLTPMASPSLAGPERDAQANASLDAFLAETCPEGDTV.A	5066.43	No match		6273000
tr|A0A140LGS5|A0A140LGS5_DANRE	Spectrin beta chain OS=Danio rerio OX=7955 GN=sptbn1 PE=1 SV=1	709	737	K.DASTEVASYRPVIDALHEQAQTLP(PEQAN)[14.0637].S	3163.61	No match		14260000
tr|F8W478|F8W478_DANRE	Chromobox homolog 1b (HP1 beta homolog Drosophila) (Fragment) OS=Danio rerio OX=7955 GN=cbx1b PE=4 SV=1	2	34	M.(S)[Acetyl]QTSEPSADAAVTEAPVSQSEPKQITAGKKQNK.K	3453.75	No match		4121000
sp|Q8JFV8|VAT1_DANRE	Synaptic vesicle membrane protein VAT-1 homolog OS=Danio rerio OX=7955 GN=vat1 PE=2 SV=1	13	59	N.AEEQKQQETKTPAESPKTESKPDPPPTSASTEAAATAAAAADTPAPA.A	4674.29	No match		1622000
tr|Q4G5V7|Q4G5V7_DANRE	Reticulon OS=Danio rerio OX=7955 GN=rtn1a PE=1 SV=1	89	138	K.SSSNPFNDGASLFSSEGNRSPPAPTGTDSGIGMTPGDPSDHQTTLQGSHK.S	5027.3	No match		5394000
tr|Q2LDA1|Q2LDA1_DANRE	Collagen type II, alpha 1 OS=Danio rerio OX=7955 GN=col2a1a PE=1 SV=1	1129	1186	A.(GERGQKGHRGFTGLQ)[-31.0659]GLPG(PPGSPGDQGAAGPAGPSGAK)[5.0069]GPSGPVGPAGKDGSNGQPG.P	5198.51	No match		5644000
tr|Q7ZVR4|Q7ZVR4_DANRE	Cbx1a protein OS=Danio rerio OX=7955 GN=cbx1a PE=1 SV=1	2	34	M.(S)[Acetyl]QPTETVSDAPSVTEEVSPDSKLAATAGKKQTK.K	3428.74	No match		2246000
tr|A8WGC6|A8WGC6_DANRE	ATP synthase subunit beta OS=Danio rerio OX=7955 GN=atp5f1b PE=1 SV=1	114	149	K.VLDTGAPIRIPVGPETLGRIMNVIGEPIDERGPIST.K	3781.07	No match		196200
tr|Q45NF8|Q45NF8_DANRE	Pcp4a OS=Danio rerio OX=7955 GN=pcp4a PE=1 SV=1	2	34	M.(S)[Acetyl]ERQESGSAGSIKPSGGQDPSKKDVPAEDFDID.M	3474.63	No match		5848000
sp|S4X0Q8|AGRA3_DANRE	Adhesion G protein-coupled receptor A3 OS=Danio rerio OX=7955 GN=adgra3 PE=1 SV=1	496	602	A.CSRMVESLQRIALLRVSNGALAYSTNSPNIALEAHAIKASSFNGMTCTLFQKLSPERTVMAHHGEISPERQLSFKCNVTSNLSALALKNTIVEASLQLPPTLFSSLG.S	11525.9	No match		3586000000
tr|A0A0R4ITP4|A0A0R4ITP4_DANRE	MAM domain-containing 2a OS=Danio rerio OX=7955 GN=mamdc2a PE=4 SV=1	536	571	S.YTGPKGDHTLGVGYFMYIEASHMLPKQSAQLMSTEL.R	3998.96	No match		309000
tr|F1QV19|F1QV19_DANRE	Gamma-glutamylcyclotransferase OS=Danio rerio OX=7955 GN=ggctb PE=1 SV=1	211	220	K.ERTEEIESED.	1235.53	No match		88540
tr|Q08BA1|Q08BA1_DANRE	ATP synthase subunit alpha OS=Danio rerio OX=7955 GN=atp5fa1 PE=1 SV=1	43	84	L.(QK)[-17.0157]TGTAEVSSILEEKILGADTGAELEETGRVLSIGDGIARVY.G	4358.28	No match		41020000
tr|Q4VBU7|Q4VBU7_DANRE	Cytochrome c oxidase polypeptide Va OS=Danio rerio OX=7955 GN=cox5aa PE=1 SV=1	117	141	Y.VIQELRPTLDELGIATPEELGIDKA.	2719.49	No match		6368000
sp|Q7ZUY3|H2AX_DANRE	Histone H2AX OS=Danio rerio OX=7955 GN=h2ax PE=2 SV=3	38	75	K.GNYAERVGAGAPVYLAAVLEYLTAEILELAGNAARDNK.K	3963.09	No match		122600
sp|Q6PD99|MRPA_DANRE	MARCKS-related protein 1-A OS=Danio rerio OX=7955 GN=marcksl1a PE=2 SV=1	153	176	N.ETPAPEAEAEPKVEEAEPKAEEPA.Q	2547.2	No match		4830000
tr|A0A0R4IG45|A0A0R4IG45_DANRE	Dynamin GTPase OS=Danio rerio OX=7955 GN=dnm1a PE=1 SV=1	797	841	R.GSAPGPPAAGGPPVPSRPGASPDPFGGPPPTVPSRPNRAPPSVPS.G	4187.18	No match		51630
tr|B8JKS7|B8JKS7_DANRE	Sodium/potassium-transporting ATPase subunit alpha OS=Danio rerio OX=7955 GN=atp1a1a.4 PE=1 SV=1	1012	1024	R.RSPGGWVEQETYY.	1570.72	No match		5465000
tr|B0UXI4|B0UXI4_DANRE	Synapsin I OS=Danio rerio OX=7955 GN=syn1 PE=1 SV=1	407	446	R.SQGPAVSPQPISQSRVPQAQQRPPPQGGPQQAAASTAATR.Q	4031.09	No match	107300
tr|A0A0R4IJU5|A0A0R4IJU5_DANRE	Synapsin IIb OS=Danio rerio OX=7955 GN=syn2b PE=1 SV=1	79	104	F.SSITNVVKQTAASAGLVEQSPATASR.K	2573.37	No match	252500
tr|A0A0R4IG45|A0A0R4IG45_DANRE	Dynamin GTPase OS=Danio rerio OX=7955 GN=dnm1a PE=1 SV=1	797	843	R.GSAPGPPAAGGPPVPSRPGASPDPFGGPPPTVPSRPNRAPPSVPSGP.	4342.24	No match	289300
tr|B0UXI4|B0UXI4_DANRE	Synapsin I OS=Danio rerio OX=7955 GN=syn1 PE=1 SV=1	392	446	K.MNETVPRTSAPTTVRSQGPAVSPQPISQSRVPQAQQRPPPQGGPQQAAASTAATR.Q	5673.93	No match	349000
tr|F1RC41|F1RC41_DANRE	Solute carrier family 12 member 10, tandem duplicate 3 OS=Danio rerio OX=7955 GN=slc12a10.3 PE=3 SV=1	78	106	V.RFGWVLGVMIRCMLNIWGVIMFLRLPWIT.S	3518.88	No match	401200
tr|Q1LVG7|Q1LVG7_DANRE	ATP synthase F1 subunit delta OS=Danio rerio OX=7955 GN=atp5f1d PE=1 SV=1	42	71	F.KEASVKQIDVPTLTGAFGILPAHVPTLQVL.R	3142.81	No match	476100
tr|A0A140LGS2|A0A140LGS2_DANRE	Histone H2A OS=Danio rerio OX=7955 GN=si:ch1073-153i20.5 PE=3 SV=1	40	76	N.YAQRVGAGAPVYLAAVLEYLTAEILELAGNAARDNKK.T	3919.13	No match	550700
tr|A0A140LGS2|A0A140LGS2_DANRE	Histone H2A OS=Danio rerio OX=7955 GN=si:ch1073-153i20.5 PE=3 SV=1	41	75	Y.AQRVGAGAPVYLAAVLEYLTAEILELAGNAARDNK.K	3625.96	No match	774700
sp|Q7ZTS4|K1C18_DANRE	Keratin, type I cytoskeletal 18 OS=Danio rerio OX=7955 GN=krt18 PE=1 SV=2	11	24	R.SSTSQVPVSQVSIK.R	1445.78	No match	857900
tr|A8WHV7|A8WHV7_DANRE	Mitochondrial ribosomal protein S36 OS=Danio rerio OX=7955 GN=mrps36 PE=1 SV=1	47	94	L.TASLPQLSQSTAPSAASVSPPPRPPGPASRLPGTPDSIAVVRELPQRY.R	4902.62	No match	982100
tr|Q5XJK2|Q5XJK2_DANRE	Histone H2A OS=Danio rerio OX=7955 GN=h2ax1 PE=2 SV=1	34	76	R.LLRKGNYAERVGAGAPVYLAA(V)[2.0130]LEYLTAEILELAGNAARDNKK.T	4602.39	No match	1355000
tr|F8W429|F8W429_DANRE	Dynamin GTPase OS=Danio rerio OX=7955 GN=dnm1a PE=1 SV=1	797	843	R.GSAPGPPAAGGPPVPSRPGASPDPFGGPPPTVPSRPNRAPPSVPSRR.P	4499.36	No match	1380000
sp|Q7ZUY3|H2AX_DANRE	Histone H2AX OS=Danio rerio OX=7955 GN=h2ax PE=2 SV=3	44	78	R.VGAGAPVYLAAVLEYLTAEILELAGNAARDNKKTR.I	3656.01	No match	1540000
tr|Q1LVG7|Q1LVG7_DANRE	ATP synthase F1 subunit delta OS=Danio rerio OX=7955 GN=atp5f1d PE=1 SV=1	107	159	L.AEEAFPLESLDVAAAKANLEKAQSELVGASDEATRAEVLISIEANEAIVKALE.	5522.91	No match	1612000
tr|X1WC76|X1WC76_DANRE	Si:dkey-108k21.24 (Fragment) OS=Danio rerio OX=7955 GN=si:dkey-108k21.24 PE=3 SV=1	1	151	.AHYSSTPRVISCSVIMARTKQTARKSTGGKAPRKQLATKAA(RKSAPATGGVKKPHRYRPGTVALREIRRYQKSTELLIRKLPFQRLVREIAQDFKT)[280.9086]DLRFQSSAVMALQEASEAYLVGLFEDTNLCAIHAKRVTIMPKDIQLARRIRGERA.	17260	No match	1668000
tr|Q7T306|Q7T306_DANRE	Creatine kinase OS=Danio rerio OX=7955 GN=ckmb PE=1 SV=1	11	40	K.MKFAVDEEFPDLSQHNNHMSKVLTKDIYNK.L	3576.76	No match	1785000
tr|A8WHV7|A8WHV7_DANRE	Mitochondrial ribosomal protein S36 OS=Danio rerio OX=7955 GN=mrps36 PE=1 SV=1	54	94	L.SQSTAPSAASVSPPPRPPGPASRLPGTPDSIAVVRELPQRY.R	4192.22	No match	1862000
tr|A0A0R4IF09|A0A0R4IF09_DANRE	Serine/threonine-protein phosphatase OS=Danio rerio OX=7955 GN=ppp3ccb PE=1 SV=2	429	469	K.GLTPTGMLPLGVLSGGRQTLQSATVEAEEARAIQGFNPQHK.I	4259.23	No match	2005000
sp|Q7ZUY3|H2AX_DANRE	Histone H2AX OS=Danio rerio OX=7955 GN=h2ax PE=2 SV=3	38	77	K.GNYAERVGAGAPVYLAAVLEYLTAEILELAGNAARDNKKT.R	4191.23	No match	2077000
tr|Q1LVG7|Q1LVG7_DANRE	ATP synthase F1 subunit delta OS=Danio rerio OX=7955 GN=atp5f1d PE=1 SV=1	42	79	F.KEASVKQIDVPTLTGAFGILPAHVPTLQVLRPGVVT(VF)[1.9342].N	3999.1	No match	2437000
sp|Q7ZUY3|H2AX_DANRE	Histone H2AX OS=Danio rerio OX=7955 GN=h2ax PE=2 SV=3	98	121	L.LGGVTIAQGGVLPNIQAVLLPKKT.G	2386.45	No match	2526000
tr|A0A0R4IHT0|A0A0R4IHT0_DANRE	Solute carrier family 25 member 12 OS=Danio rerio OX=7955 GN=slc25a12 PE=1 SV=1	664	682	K.SSGISTIHPETPKETAGAS.	1868.93	No match	3037000
tr|Q4G5V7|Q4G5V7_DANRE	Reticulon OS=Danio rerio OX=7955 GN=rtn1a PE=1 SV=1	440	465	K.ASNPFDKPQTNKVSASNPFDLSAGSK.M	2706.34	No match	3080000
tr|Q1LVG7|Q1LVG7_DANRE	ATP synthase F1 subunit delta OS=Danio rerio OX=7955 GN=atp5f1d PE=1 SV=1	42	79	F.KEASVKQIDVPTLTGAFGILPAHVPTLQVLRPGVVTVF.N	3997.3	No match	3138000
tr|E7EXD7|E7EXD7_DANRE	Histone H2A OS=Danio rerio OX=7955 GN=si:ch211-113a14.19 PE=3 SV=1	98	128	L.LGGVTIAQGGVLPNIQAVLL(PKKTEKAAKGK)[-455.2772].	2643.59	No match	3325000
tr|F1QDM6|F1QDM6_DANRE	Heat shock 10 protein 1 OS=Danio rerio OX=7955 GN=hspe1 PE=1 SV=1	39	54	K.VLQATVVAVGPGSTNK.D	1539.87	No match	3409000
sp|Q92005|EF1A_DANRE	Elongation factor 1-alpha OS=Danio rerio OX=7955 GN=eef1a PE=2 SV=1	256	290	K.IGGIGTVPVGRVETGVLKPGMVVTFAPANVTTEVK.S	3492.97	No match	3435000
tr|E7FE82|E7FE82_DANRE	Ninjurin 2 OS=Danio rerio OX=7955 GN=ninj2 PE=3 SV=1	2	24	M.PAATGRTDPQPTEPLNMNHYATK.K	2509.22	No match	3526000
tr|Q1LVG7|Q1LVG7_DANRE	ATP synthase F1 subunit delta OS=Danio rerio OX=7955 GN=atp5f1d PE=1 SV=1	42	122	F.KEASVKQIDVPTLTGAFGILPAHVPTLQVLRPGVVTVFNDDGSSKKYFVSSGSVTVNADSSVQLLAEEAFPLESLDVAAAK.A	8424.51	No match	3580000
tr|Q6DHP2|Q6DHP2_DANRE	Troponin I type 2b (skeletal, fast), tandem duplicate 2 OS=Danio rerio OX=7955 GN=tnni2b.2 PE=1 SV=1	82	108	K.VAKSDKEIEDLKIKVQDLIGKFKKPAL.K	3052.81	No match	3668000
tr|A0A0R4IKJ0|A0A0R4IKJ0_DANRE	Myosin, light chain 10, regulatory OS=Danio rerio OX=7955 GN=myl10 PE=1 SV=1	8	29	K.KKEAASSNVFSMFEQSQIQEFK.E	2562.26	No match	3855000
sp|Q7ZUY3|H2AX_DANRE	Histone H2AX OS=Danio rerio OX=7955 GN=h2ax PE=2 SV=3	79	111	R.IIPRHLQLAVRNDEELNKLLGGVTIAQGGVLPN.I	3547.02	No match	3955000
tr|A0A2R8Q1X2|A0A2R8Q1X2_DANRE	2-phospho-D-glycerate hydro-lyase OS=Danio rerio OX=7955 GN=eno1a PE=1 SV=1	2	28	M.(S)[Acetyl]ILKIHAREIFDSRGNPTVEVDLYTKK.G	3170.73	No match	3995000
tr|A8KBJ5|A8KBJ5_DANRE	Histone H3 OS=Danio rerio OX=7955 GN=zgc:173552 PE=1 SV=1	94	136	L.(QES)[2.1172]SEAYLVGLFEDTNLCAIHAKRVTIMPKDIQLARRIRGERA.	4899.55	No match	4222000
tr|E9QJI6|E9QJI6_DANRE	2-phospho-D-glycerate hydro-lyase (Fragment) OS=Danio rerio OX=7955 GN=eno3 PE=1 SV=1	2	28	M.(S)[Acetyl]ISKIHAREILDSRGNPTVEVDLYTTK.G	3083.64	No match	4547000
tr|A0A0R4IPH2|A0A0R4IPH2_DANRE	Tubulin beta chain OS=Danio rerio OX=7955 GN=tubb2b PE=1 SV=1	363	391	K.MAATFIGNSTAIQELFKRISEQFTAMFRR.K	3363.74	No match	4559000
tr|A2BGX6|A2BGX6_DANRE	Myosin heavy chain 4 OS=Danio rerio OX=7955 GN=myhc4 PE=1 SV=1	1899	1925	L.RKVQHELEEAEERADISESQVNKLRAK.S	3191.68	No match	4578000
tr|B0UXI4|B0UXI4_DANRE	Synapsin I OS=Danio rerio OX=7955 GN=syn1 PE=1 SV=1	61	92	F.SSISNAVKQTTAAAAATFNEATERGIGSGNAK.I	3122.59	No match	4623000
tr|Q568Q7|Q568Q7_DANRE	Stathmin OS=Danio rerio OX=7955 GN=stmn1b PE=1 SV=1	46	72	K.EVSLDEIQKKLDAAEERRKNHEAEVLK.H	3176.7	No match	5033000
tr|E7F0U0|E7F0U0_DANRE	Myelin basic protein OS=Danio rerio OX=7955 GN=mbpa PE=1 SV=2	50	72	S.SPQ(RPHHSSTRRR)[4.0335]GDVNPVVHFF.R	2716.42	No match	5099000
tr|Q9I8U7|Q9I8U7_DANRE	Fast skeletal muscle myosin light polypeptide 3 OS=Danio rerio OX=7955 GN=mylz3 PE=1 SV=1	77	128	K.TVDANQKGTYDDYVEGLRVFDKEGNGTVMGAELRIVLSTLGEKMSEPEIDAL.M	5673.8	No match	5148000
tr|B3DFP9|B3DFP9_DANRE	Apolipoprotein A-II OS=Danio rerio OX=7955 GN=apoa2 PE=1 SV=1	102	141	K.ARLNALGVYGHYFRPYVGAYLDSAINNVKPVLDTVLPQGN.	4374.31	No match	5509000
tr|A0A2R8Q859|A0A2R8Q859_DANRE	ENTH domain-containing protein OS=Danio rerio OX=7955 GN=snap91a PE=3 SV=1	840	888	M.GQ(PMMRPQFTGPSATGT)[28.0491]PGAPLSPGPAAQSPKKPPSKDPLADLNIKDFL.	5038.64	No match	5575000
tr|F1QCR7|F1QCR7_DANRE	160 kDa neurofilament protein OS=Danio rerio OX=7955 GN=nefma PE=1 SV=1	31	44	R.SQTWSRTSPSSSSY.K	1559.7	No match	5580000
sp|Q7ZVF9|ACTB2_DANRE	Actin, cytoplasmic 2 OS=Danio rerio OX=7955 GN=actbb PE=1 SV=2	21	45	G.FAGDDAPRAVFPSIVGRPRHQGVMV.G	2678.4	No match	5889000
tr|A0A2R8QI85|A0A2R8QI85_DANRE	Microtubule-associated protein 1Ab OS=Danio rerio OX=7955 GN=map1ab PE=1 SV=1	329	371	K.THTPAKPSKKETDEHEDVSVVETKSDSVKENKVEKKEEKKHTK.S	4943.57	No match	6367000
sp|Q5BJA5|H2B1_DANRE	Histone H2B 1/2 OS=Danio rerio OX=7955 GN=zgc:112234 PE=2 SV=3	92	124	R.EIQTAVRLLLPGELAKHAVSEGTKAVTKYTSSK.	3524.99	No match	6369000
tr|E7EXD7|E7EXD7_DANRE	Histone H2A OS=Danio rerio OX=7955 GN=si:ch211-113a14.19 PE=3 SV=1	34	72	R.LLRKGNYAERVGAGAPVYLAAVLEYLTAE(IL)[6.0268]ELAGNAAR.D	4121.16	No match	6422000
tr|F1R4A4|F1R4A4_DANRE	Histone H2B OS=Danio rerio OX=7955 GN=zgc:171759 PE=1 SV=1	86	107	R.(ST)[7.0327]ITSREIQTAVRLLLPGELAK.H	2402.34	No match	6554000
tr|F6NIF4|F6NIF4_DANRE	Creatine kinase (Fragment) OS=Danio rerio OX=7955 GN=ckbb PE=1 SV=1	12	32	K.MNYSAEQEYPDLTKHNNHMAK.V	2520.14	No match	6800000
sp|Q6PI52|CALM_DANRE	Calmodulin OS=Danio rerio OX=7955 GN=calm1a PE=2 SV=3	2	76	M.(A)[Acetyl]DQLTEEQIAEFKEAFSLFDKDGDGTITTKELGTVMRSLGQNPTEAELQDMINE(VDADGNGTIDFPEFLTMMARK)[34.7528].M	8388.45	No match	7637000
tr|Q7SZP4|Q7SZP4_DANRE	Zgc:65851 OS=Danio rerio OX=7955 GN=zgc:65851 PE=1 SV=1	2	24	M.(S)[Acetyl]YSGDIYTSSSYRKIFGDAPRRV.P	2666.32	No match	8105000
tr|A0A0R4IEZ2|A0A0R4IEZ2_DANRE	Actin alpha cardiac muscle 1a OS=Danio rerio OX=7955 GN=actc1a PE=1 SV=1	68	91	L.KYPIEHGIITNWDDMEKIWHHTFY.N	3072.48	No match	8233000
tr|A0A0R4IEZ2|A0A0R4IEZ2_DANRE	Actin alpha cardiac muscle 1a OS=Danio rerio OX=7955 GN=actc1a PE=1 SV=1	68	91	L.KY(PIEH)[14.0299]GIITNWDDMEKIWHHTFY.N	3086.49	No match	8655000
tr|Q6DHP2|Q6DHP2_DANRE	Troponin I type 2b (skeletal, fast), tandem duplicate 2 OS=Danio rerio OX=7955 GN=tnni2b.2 PE=1 SV=1	85	110	K.SDKEIEDLKIKVQDLIGKFKKPALKK.V	3010.8	No match	9086000
tr|A0A2R8RJJ2|A0A2R8RJJ2_DANRE	Zgc:86709 OS=Danio rerio OX=7955 GN=actc2 PE=3 SV=1	94	120	Y.NELRVAPEEHPTLLTEAPLNPKANREK.M	3065.65	No match	9108000
sp|Q5BJA5|H2B1_DANRE	Histone H2B 1/2 OS=Danio rerio OX=7955 GN=zgc:112234 PE=2 SV=3	43	85	K.VLKQVHPDTGISSKAMGI(MNS)[16.0345]FVNDIFERIAGEASRLAHYNKR.S	4815.51	No match	9183000
sp|Q71PD7|H2AV_DANRE	Histone H2A.V OS=Danio rerio OX=7955 GN=h2az2a PE=2 SV=3	41	78	R.TTSHGRVGATAAVYSAAILEYLTAEVLELAGNASKDLK.V	3890.07	No match	9328000
sp|Q7ZUY3|H2AX_DANRE	Histone H2AX OS=Danio rerio OX=7955 GN=h2ax PE=2 SV=3	37	76	R.KGNYAERVGAGAPVYL(A)[39.0676]AVLEYLTAEILELAGNAARDNKK.T	4257.24	No match	9626000
tr|Q6P3J2|Q6P3J2_DANRE	Rho GDP dissociation inhibitor (GDI) alpha OS=Danio rerio OX=7955 GN=arhgdia PE=1 SV=1	178	203	K.SKFTDDDKHDHLSWEWNLNIKKDWKD.	3299.58	No match	9945000
sp|Q7ZUY3|H2AX_DANRE	Histone H2AX OS=Danio rerio OX=7955 GN=h2ax PE=2 SV=3	34	82	R.LLRKGNYAERVGAGAPVYLAAVLEYLTAEILELAGNAARDNKKTRIIPR.H	5337.02	No match	10440000
sp|Q7ZVF9|ACTB2_DANRE	Actin, cytoplasmic 2 OS=Danio rerio OX=7955 GN=actbb PE=1 SV=2	19	50	K.AGFAGDDAPRAVFPSIVGRPRHQGVMVGMGQK.D	3307.7	No match	10600000
tr|F1Q9A4|F1Q9A4_DANRE	Cytochrome c oxidase subunit 7A2a OS=Danio rerio OX=7955 GN=cox7a2a PE=1 SV=1	50	83	L.TDGLLYRL(TMALTI)[-44.7585]FGSGYVVYTLFDAAMPKKKD.	3753.11	No match	11230000
tr|A8WGC6|A8WGC6_DANRE	ATP synthase subunit beta OS=Danio rerio OX=7955 GN=atp5f1b PE=1 SV=1	39	98	Y.AAPAAAAAAASGRIVAVIGAVVDVQFDEGLPPILNALEVAGRDSRLVLEVAQHLGENTVR.T	6026.31	No match	11820000
tr|A0A2R8RZK5|A0A2R8RZK5_DANRE	Tubulin alpha chain OS=Danio rerio OX=7955 GN=tuba1c PE=3 SV=1	53	84	F.FSETGAGKHVPRAVFVDLEPTVIDEVRTGTYR.Q	3545.85	No match	12280000
tr|A0A0R4IEZ2|A0A0R4IEZ2_DANRE	Actin alpha cardiac muscle 1a OS=Danio rerio OX=7955 GN=actc1a PE=1 SV=1	70	91	Y.PIEHGIITNWDDMEKIWHHTFY.N	2781.32	No match	12450000
tr|A0A2R8Q2N5|A0A2R8Q2N5_DANRE	Myosin, heavy polypeptide 1.2, skeletal muscle OS=Danio rerio OX=7955 GN=myhz1.2 PE=3 SV=1	1819	1841	R.VRELESEVEAEQRRGADAVKGVR.K	2582.37	No match	13250000
tr|Q6PBR5|Q6PBR5_DANRE	V-type proton ATPase subunit G OS=Danio rerio OX=7955 GN=atp6v1g1 PE=1 SV=1	57	92	K.TKEAAALGSHGNSAVEVDKETVDKMGRIQGSYQQNK.E	3845.93	No match	14840000
tr|A0A2R8QTL0|A0A2R8QTL0_DANRE	Myosin light chain, phosphorylatable, fast skeletal muscle a OS=Danio rerio OX=7955 GN=mylpfa PE=1 SV=1	7	31	K.RRAAGGEGSSNVFS(M)[16.0021]FEQSQIQEYK.E	2821.33	No match	15510000
tr|A2BGX6|A2BGX6_DANRE	Myosin heavy chain 4 OS=Danio rerio OX=7955 GN=myhc4 PE=1 SV=1	1849	1878	R.VKELTYQTEEDKKNINRLQDLVDKLQLKVK.A	3628.05	No match	15960000
tr|Q6TNV0|Q6TNV0_DANRE	Cytochrome c oxidase subunit 4I1 OS=Danio rerio OX=7955 GN=cox4i1 PE=1 SV=1	23	60	R.GAHGVAKVEDYSLPAYFDRRESPLPEIKFVQQLSADQK.S	4288.22	No match	16450000
sp|Q7ZUY3|H2AX_DANRE	Histone H2AX OS=Danio rerio OX=7955 GN=h2ax PE=2 SV=3	77	104	K.TRIIPRHLQLAVRNDEELNKLLGGVTIA.Q	3138.83	No match	16540000
tr|A0A140LGS2|A0A140LGS2_DANRE	Histone H2A OS=Danio rerio OX=7955 GN=si:ch1073-153i20.5 PE=3 SV=1	83	127	R.HLQLAVRNDEELNKLLGGVTIAQGGVL(PNIQAVLLPKKTEKAAKK)[-230.1649].	4584.64	No match	18870000
sp|Q5BJA5|H2B1_DANRE	Histone H2B 1/2 OS=Danio rerio OX=7955 GN=zgc:112234 PE=2 SV=3	86	109	R.STITSREIQTAVRLLLPGELAKHA.V	2603.49	No match	18920000
tr|Q08BA1|Q08BA1_DANRE	ATP synthase subunit alpha OS=Danio rerio OX=7955 GN=atp5fa1 PE=1 SV=1	133	170	R.TGAIVDVPVGEELLGRVVDALGNPIDGKGPLGSKERRR.V	3939.19	No match	20140000
tr|F1RCH5|F1RCH5_DANRE	Cytochrome c oxidase polypeptide Vb OS=Danio rerio OX=7955 GN=zgc:86599 PE=1 SV=1	30	65	M.AAGGIPTDEEQATGLEKKIMTALKTGSDPYSMLKPK.S	3775.97	No match	21060000
tr|B8JM34|B8JM34_DANRE	ATP synthase-coupling factor 6, mitochondrial OS=Danio rerio OX=7955 GN=atp5pf PE=1 SV=1	66	97	D.AGPVYQKNLAEETTKLQRLYGGGDLSKFPQFS.F	3541.84	No match	25010000
sp|Q7ZUY3|H2AX_DANRE	Histone H2AX OS=Danio rerio OX=7955 GN=h2ax PE=2 SV=3	37	77	R.KGNYAERVGAGAPVYLAAVLEYLTAEILELAGNAARDNKKT.R	4318.32	No match	26760000
tr|A0A140LGS2|A0A140LGS2_DANRE	Histone H2A OS=Danio rerio OX=7955 GN=si:ch1073-153i20.5 PE=3 SV=1	87	123	L.AVRNDEELNKLLGGVTIAQGGVLPNIQAVLLPKKTEK.A	3925.25	No match	28600000
tr|Q0P3U4|Q0P3U4_DANRE	Cytochrome c oxidase polypeptide Vb OS=Danio rerio OX=7955 GN=cox5b2 PE=1 SV=1	30	53	M.AGKGIPTDDEQAAGLERRVLQAMK.K	2553.35	No match	28830000
tr|Q6ZM17|Q6ZM17_DANRE	Novel protein similar to zebrafish hemoglobin alpha-adult 1 (Hbaa1) OS=Danio rerio OX=7955 GN=si:ch211-5k11.8 PE=1 SV=1	2	44	M.(S)[Acetyl]LSDKDKAVVKAIWAKISPKADEIGAE(A)[16.0108]LARMLTVYPQTKTYF.S	4810.59	No match	31790000
sp|Q90487|HBA_DANRE	Hemoglobin subunit alpha OS=Danio rerio OX=7955 GN=hbaa1 PE=2 SV=3	93	143	K.LRVDPANFKILSHNVIVVIAMLFPADFTPEVHVSVDKFFNNLALALSEKYR.	5797.15	No match	33090000
sp|Q8JH70|ALDCB_DANRE	Fructose-bisphosphate aldolase C-B OS=Danio rerio OX=7955 GN=aldocb PE=2 SV=1	2	59	M.(T)[Acetyl]HQYPALTAEQKKELQDIAQRIVAPGKGILAAD(EST)[16.0095]GSMAKRLNPIGVENTEENRRLY.R	6476.39	No match	33230000
tr|Q5XJK2|Q5XJK2_DANRE	Histone H2A OS=Danio rerio OX=7955 GN=h2ax1 PE=2 SV=1	2	128	M.(S)[Acetyl]GRGKTGGKARAKAKSRSSRAGLQFPVGRVHRLLRKGNYAERVGAGAPVYLAAVLEYLTAEILELAGNAARDNKKTRIIPRHLQLAVRNDEELNKLLGGVTIAQGGVLPNIQAVLLPKKTEKPAKSK.	13632.8	No match	37900000
tr|A0A1D5NS25|A0A1D5NS25_DANRE	Troponin T type 3b (skeletal, fast) (Fragment) OS=Danio rerio OX=7955 GN=tnnt3b PE=1 SV=1	169	208	R.RKPLNIDHMNEDKLREKAKELWDWLYSLEAEKFEHMEKLK.R	5039.61	No match	41390000
tr|E9QG51|E9QG51_DANRE	Myosin light chain, phosphorylatable, fast skeletal muscle b (Fragment) OS=Danio rerio OX=7955 GN=mylpfb PE=1 SV=1	1	11	.(M)[87.0377]FEQSQIQEYK.E	1516.7	No match	42300000
sp|Q7ZUY3|H2AX_DANRE	Histone H2AX OS=Danio rerio OX=7955 GN=h2ax PE=2 SV=3	77	114	K.TRIIPRHLQLAVRNDEELNKLLGGVTIAQGGVLPNIQA.V	4116.35	No match	44520000
tr|Q6PBP0|Q6PBP0_DANRE	Cytochrome c oxidase polypeptide VIIc OS=Danio rerio OX=7955 GN=cox7c PE=1 SV=1	17	63	S.SHYAEGPGKNLPFSVENKWRLLGMMVLFFGSGFAFPFIVVRHQILKK.	5391.91	No match	46420000
tr|A2BGX6|A2BGX6_DANRE	Myosin heavy chain 4 OS=Danio rerio OX=7955 GN=myhc4 PE=1 SV=1	1849	1897	R.VKELTYQTEEDKKNINRLQDLVDKLQLKVKAYKRQSEEAEEQANSHLSK.L	5814.1	No match	49080000
tr|A0A140LGV2|A0A140LGV2_DANRE	Histone H4 OS=Danio rerio OX=7955 GN=si:ch73-368j24.1 PE=1 SV=1	1	94	.MSGVGKRQRCRM(VLRDNLH)[-424.1036]GITKTAIRRLARRGGVKRISGLIYGETRDVLKVFLTNVIRDAVTYTEHAKRKTVTAIDVVYALKRQGRTLYGFGG.	10174.8	No match	52660000
sp|Q1LUK1|MIC13_DANRE	MICOS complex subunit MIC13 OS=Danio rerio OX=7955 GN=micos13 PE=3 SV=1	89	111	L.SVAPSTVGDYTKQGLQYVKDLSK.	2482.3	No match	53600000
tr|A0A140LGS2|A0A140LGS2_DANRE	Histone H2A OS=Danio rerio OX=7955 GN=si:ch1073-153i20.5 PE=3 SV=1	37	77	R.KGNYAQRVGAGAPVYLAAVLEYLTAEILELAGNAARDNKKT.R	4319.32	No match	61960000
tr|A0A140LGS2|A0A140LGS2_DANRE	Histone H2A OS=Danio rerio OX=7955 GN=si:ch1073-153i20.5 PE=3 SV=1	2	123	M.(S)[Acetyl]GRGKTGGKARAKAKSRSSRAGLQFPVGRVHRLLRKGNYAQRVGAGAPVYLAAVLEYLTAEILELAGNAARDNKKTRIIPRH(LQLAVRNDEELNKLLGGV)[-1.9961]TIAQGGVLPNIQAVLLPKKTEK.A	13119.5	No match	70050000
tr|A0A140LGS2|A0A140LGS2_DANRE	Histone H2A OS=Danio rerio OX=7955 GN=si:ch1073-153i20.5 PE=3 SV=1	2	113	M.(S)[Acetyl]GRGKTGGKARAKAKSRSSRAGLQFPVGRVHRLLRKGNYAQRVGAGAPVYLAAVLEYLTAEILELAGNAARDNKKTRIIPRHLQLAVRNDEELNKLLGGVTIAQGGVLPNIQ.A	12012.8	No match	81730000
tr|Q5XJK2|Q5XJK2_DANRE	Histone H2A OS=Danio rerio OX=7955 GN=h2ax1 PE=2 SV=1	38	76	K.GNYAERVGAGAPVYLAAVLEYLTAEILELAGNAARDNKK.T	4089.18	No match	83730000
tr|A7MBY4|A7MBY4_DANRE	Histone H2B OS=Danio rerio OX=7955 GN=zgc:171759 PE=1 SV=1	1	67	.(MGIMNS)[-381.8929]FVNDIFERIAGEASRLAHYNKRSTITSREIQTAVRLLLPGELAKHAVSEGTKAVTKYTSSK.	7008.8	No match	85400000
tr|Q6P0T7|Q6P0T7_DANRE	Tnnt3b protein OS=Danio rerio OX=7955 GN=tnnt3b PE=1 SV=1	2	74	M.(S)[Acetyl]DTEDVGVEEEKPKFKPSAPKIPDGDKVDFDDIQKKRQNKDLVELQALIDAHFEHRKKEEEELIALKDRIEKR.R	8593.53	No match	86860000
tr|A0A140LGS2|A0A140LGS2_DANRE	Histone H2A OS=Danio rerio OX=7955 GN=si:ch1073-153i20.5 PE=3 SV=1	83	127	R.HLQLAVRNDEELNKLLGGVTIAQGGVLPNIQA(VLLPKKTEKAAKK)[-398.2583].	4416.55	No match	88860000
sp|Q6PI52|CALM_DANRE	Calmodulin OS=Danio rerio OX=7955 GN=calm1a PE=2 SV=3	2	149	M.(A)[Acetyl]DQLTEEQIAEFKEAFSLFDKDGDGTITTKELGTVMRSLGQNPTEAELQDMINE(VDADGNGTIDFPEFLTMMARKMKDTDSEEEIREAFRVFDKDGNGYISAAELRHVMTNLGEKLTDEEVDEMIREADIDGDGQVNYEEFV)[44.6647]QMMTAK.	16782	No match	89790000
sp|Q5BJA5|H2B1_DANRE	Histone H2B 1/2 OS=Danio rerio OX=7955 GN=zgc:112234 PE=2 SV=3	86	115	R.STITSREIQTAVRLLLPGELAKHAVSEGTK.A	3204.81	No match	94870000
sp|Q5BJA5|H2B1_DANRE	Histone H2B 1/2 OS=Danio rerio OX=7955 GN=zgc:112234 PE=2 SV=3	57	84	K.AMGIMNSFVNDIFERIAGEASRLAHYNK.R	3153.57	No match	106900000
tr|E7FE07|E7FE07_DANRE	Histone H2A OS=Danio rerio OX=7955 GN=hist1h2a1 PE=3 SV=1	2	123	M.(S)[Acetyl]GRGKTGGKARAKAKSRSSRAGLQFPVGRIHRLLRKGNYAQRVGAGAPVYLAAVLEYLTAEILELAGNAARDNKKTRIIPRHLQLAVRNDEELNKLLGGVTIAQGGVLPNIQAVLLPKKTEK.A	13135.5	No match	123500000
sp|Q6PC60|H2B3_DANRE	Histone H2B 3 OS=Danio rerio OX=7955 GN=hist2h2l PE=2 SV=3	14	126	K.GSKKAVTKTQKKGDKKRRKTRKESYAIYVYKVLKQVHPDTGISSKAMGIMNSFVNDIFERIAGEASRLAHYNKRSTITSREIQTAVRLLLPGELAKHAVSEGTKAVTKYTSSK.	12607	No match	128700000
tr|A0A0R4IUP0|A0A0R4IUP0_DANRE	DDHD domain-containing 2 (Fragment) OS=Danio rerio OX=7955 GN=ddhd2 PE=4 SV=1	182	274	T.LKRGVENISIEIPEGEPEIVDHLVFMVHGIGPACDIRLRGIVQCVNEFRNASNSLITSHFRPSGDSSIIGRVEYLPVNWHKVLHGETTGVDKD.I	10309.3	No match	132600000
tr|A0A2R8RJJ2|A0A2R8RJJ2_DANRE	Zgc:86709 OS=Danio rerio OX=7955 GN=actc2 PE=3 SV=1	64	115	K.RGILTLKYP(IEH)[14.0379]GIITNWDDMEKIWHHTFYNELRVAPEEHPTLLTEAPLNPK.A	6189.25	No match	133500000
tr|A0A0R4IEZ2|A0A0R4IEZ2_DANRE	Actin alpha cardiac muscle 1a OS=Danio rerio OX=7955 GN=actc1a PE=1 SV=1	62	91	K.RGILTLKYPIEHGIITNWDDMEKIWHHTFY.N	3725.91	No match	133800000
sp|Q7ZUY3|H2AX_DANRE	Histone H2AX OS=Danio rerio OX=7955 GN=h2ax PE=2 SV=3	36	76	L.RKGNYAERVGAGAPVYLAAVLEYLTAEILELAGNAARDNKK.T	4374.38	No match	178800000
sp|Q4QRF4|H32_DANRE	Histone H3.2 OS=Danio rerio OX=7955 GN=zgc:113984 PE=2 SV=3	27	136	A.RKSAPATGGVKKPHRYRPGTVALREIRRYQKSTELLIRKLPFQRLVREIAQ(D)[-114.0197]FKTDLRFQSSAVMALQEASEAYLVGLFEDTNLCAIHAKRVTIMPKDIQLARRIRGERA.	12527	No match	221200000
tr|A0A2R8RR55|A0A2R8RR55_DANRE	Uncharacterized protein OS=Danio rerio OX=7955 PE=4 SV=1	229	307	G.MQIFVKTLTGKTITLEVEPSDTIENVKAKIQDKEGIPPDQQRLIFAGKQLEDGRTLSD(YNIQ)[-456.2624]KESTLHLVLRLRGGTKI.	8445.63	No match	310400000
sp|Q4QRF4|H32_DANRE	Histone H3.2 OS=Danio rerio OX=7955 GN=zgc:113984 PE=2 SV=3	61	136	E.(LLIRKLPFQRLVREIAQD)[255.1564]FKTDLRFQSSAVMALQEASEAYLVGLFEDTNLCAIHAKRVTIMPKDIQLARRIRGERA.	9020.98	No match	338000000
tr|X1WER9|X1WER9_DANRE	Cytochrome c oxidase subunit 8B OS=Danio rerio OX=7955 GN=cox8b PE=3 SV=1	25	73	N.ITAKPAKHALSAGEQVIALSVMFVTILGPSGWILSHLEDYKHRPGAAQE.	5236.83	No match	432400000
tr|A0A140LG23|A0A140LG23_DANRE	Histone H3 OS=Danio rerio OX=7955 GN=hist2h3ca1 PE=3 SV=1	25	136	K.AARKSAPATGGVKKPHRYRPGTVALREIRRYQKSTELLIRKLPFQRLVREIAQDFKTDQRFQSSA(VMALQEASEA)[-245.7698]YLVGLFEDTNLCAIHAKRVTIMPKDIQLARRIRGERA.	12552	No match	606000000
sp|Q4QRF4|H32_DANRE	Histone H3.2 OS=Danio rerio OX=7955 GN=zgc:113984 PE=2 SV=3	58	136	K.STELLIRKLPFQRLVREIAQDFKTDLRFQSSAVMALQEA(SEA)[15.0787]YLVGLFEDTNLCAIHAKRVTIMPKDIQLARRIRGERA.	9097.97	No match	643000000
sp|Q9I8V0|PRV2_DANRE	Parvalbumin-2 OS=Danio rerio OX=7955 GN=pvalb2 PE=3 SV=3	2	109	M.(A)[Acetyl]FAGILKDEDVAAALKDCAAADSFNYKNFFAKVGLSAKSPDDIKKAFFVIDQDKSGFIEEDELKLFLQNFSAGARALTDAETKAFLSAGDSDGDGKIGVDEFALLVKA.	11524.9	No match	1459000000
tr|Q1LVY8|Q1LVY8_DANRE	Si:ch211-197g15.6 OS=Danio rerio OX=7955 GN=ifi44f5 PE=4 SV=1	1	100	.(M)[Acetyl]VVMVDPALGSSCIFATMTNHQCIIKGEMHINPATLYGNNTNLIECEVFKVEQNQVNAVIKIKPWRNVQWTAKQRDELMKMIRNYKPLTTSVSQVKILMI.G	11484.9	No match	9839000000

## Sheet: Tel2
Protein accession	Protein description	First residue	Last residue	Proteoform	Precursor mass	Match	Proteoform intensity_Tel2_run1	Proteoform intensity_Tel2_run2
tr|Q3B732|Q3B732_DANRE	High mobility group nucleosomal-binding domain 2 OS=Danio rerio OX=7955 GN=hmgn2 PE=1 SV=1	2	24	M.PKRKIDGEKGAKGKEEPTRRSAR.L	2593.48	Match	1194000	681600
tr|Q6P5L5|Q6P5L5_DANRE	NADH dehydrogenase [ubiquinone] 1 beta subcomplex subunit 8, mitochondrial OS=Danio rerio OX=7955 GN=ndufb8 PE=1 SV=1	164	188	Y.PYNNLYLERGGDPEKEPEPVKNYEI.	2962.46	Match	3739000	1206000
tr|E9QEE8|E9QEE8_DANRE	Complex I-B15 OS=Danio rerio OX=7955 GN=ndufb4 PE=1 SV=1	2	27	M.(S)[Acetyl]RLREYKPAPLATLPKTLDPDEYYNL.S	3104.63	Match	2437000	1234000
tr|Q8UUT3|Q8UUT3_DANRE	DMalpha2b OS=Danio rerio OX=7955 GN=plp1b PE=1 SV=1	2	27	M.(A)[Acetyl]ASAVDWLGQLPQRLRGVDVKSSNLR.R	2877.57	Match	1998000	1267000
tr|E7FFT5|E7FFT5_DANRE	High mobility group nucleosome-binding domain 6 OS=Danio rerio OX=7955 GN=hmgn6 PE=1 SV=1	2	22	M.PKRKRADGEAKDEPQRRSARL.S	2463.38	Match	1097000	1333000
tr|F8W3B3|F8W3B3_DANRE	Myelin basic protein OS=Danio rerio OX=7955 GN=mbpa PE=1 SV=1	2	29	M.(A)[Acetyl]TASTSG(QN)[0.9983]PFGLGRKKKAPGVLDQISR.F	2926.58	Match	2107000	1441000
sp|Q5PRD0|143BA_DANRE	14-3-3 protein beta/alpha-A OS=Danio rerio OX=7955 GN=ywhaba PE=2 SV=2	1	26	.(M)[Acetyl]DKSDLVQKAKLAEQAERYDDMAASM.K	2985.41	Match	3370000	1465000
sp|A2BGU8|SEPT3_DANRE	Neuronal-specific septin-3 OS=Danio rerio OX=7955 GN=septin3 PE=2 SV=1	2	27	M.(S)[Acetyl]EIVPPEVRPKPAVPAKPSHVAPPSS.A	2714.5	Match	4229000	2047000
tr|Q6PC77|Q6PC77_DANRE	ATP synthase subunit d, mitochondrial OS=Danio rerio OX=7955 GN=atp5pd PE=1 SV=1	2	29	M.(A)[Acetyl]GRRAAVKAIDWLAFAERVPPNQRAMFN.S	3196.7	Match	10260000	2076000
tr|Q568R9|Q568R9_DANRE	Gamma1b-synuclein OS=Danio rerio OX=7955 GN=sncga PE=1 SV=1	87	111	E.TMVASAGLVKPGVVKHEEQPADAGQ.	2518.3	Match	5647000	2368000
tr|F1QY27|F1QY27_DANRE	H1.10 linker histone OS=Danio rerio OX=7955 GN=h1-10 PE=1 SV=1	2	27	M.PAVVEESAPAPAPAPAEKKAKPAVAA.S	2466.36	Match	5031000	2414000
tr|A0A0R4ITV0|A0A0R4ITV0_DANRE	Si:dkey-46i9.1 OS=Danio rerio OX=7955 GN=si:dkey-46i9.1 PE=4 SV=1	2	54	M.(S)[Acetyl]ERGHTGQANSSQTSNTDNKEKASDSAGKPEQEEEIDIDLEAPETEKAALAIQ.N	5695.69	Match	4301000	2486000
sp|Q6PI52|CALM_DANRE	Calmodulin OS=Danio rerio OX=7955 GN=calm1a PE=2 SV=3	2	52	M.(A)[Acetyl]DQLTEEQIAEFKEAFSLFDKDGDGTITTKELGTVMRSLGQNPTEAELQD(M)[-95.2303].I	5593.3	Match	5396000	2709000
tr|E7FD23|E7FD23_DANRE	Si:dkey-276j7.1 OS=Danio rerio OX=7955 GN=si:dkey-276j7.1 PE=1 SV=1	2	37	M.(A)[Acetyl]AEPNYRRTKPGVKQAQNASSNGAVGPSSQIPGLSA.T	3649.87	Match	4247000	2759000
sp|Q1RM09|BASP1_DANRE	Brain acid soluble protein 1 homolog OS=Danio rerio OX=7955 GN=basp1 PE=2 SV=2	154	197	A.SESKPDAESKKTEAPPTKESAPAEPITTETSPAPNKEQAVAVQD.	4590.27	Match	4741000	2837000
tr|B3DFP9|B3DFP9_DANRE	Apolipoprotein A-II OS=Danio rerio OX=7955 GN=apoa2 PE=1 SV=1	89	141	A.GGLASELEPVVDKARLNALGVYGHYFRPYVGAYLDSAINNVKPVLDTVLPQGN.	5668.02	Match	6652000	2857000
tr|A0A2R8QN30|A0A2R8QN30_DANRE	Myelin protein zero OS=Danio rerio OX=7955 GN=mpz PE=1 SV=1	190	228	K.KGKGKEGSQQKQASAVTDPAKLKAAASEKKKQESRREKK.	4238.4	Match	2225000	2923000
tr|Q7SZP4|Q7SZP4_DANRE	Zgc:65851 OS=Danio rerio OX=7955 GN=zgc:65851 PE=1 SV=1	2	37	M.(S)[Acetyl]YSGDIYTSSSYRKIFGDAPRRVPVGSSPSRVTVSY.R	3984.01	Match	1600000	2938000
tr|Q7SZP4|Q7SZP4_DANRE	Zgc:65851 OS=Danio rerio OX=7955 GN=zgc:65851 PE=1 SV=1	2	37	M.(S)[Acetyl]YSGDIYTSSSYRKIFGDAPRRVPVGSSPSRVTVSY.R	3983	Match	4995000	2938000
tr|B3DFP9|B3DFP9_DANRE	Apolipoprotein A-II OS=Danio rerio OX=7955 GN=apoa2 PE=1 SV=1	108	141	L.GVYGHYFRPYVGAYLDSAINNVKPVLDTVLPQGN.	3735.94	Match	3005000	2999000
tr|Q45NF8|Q45NF8_DANRE	Pcp4a OS=Danio rerio OX=7955 GN=pcp4a PE=1 SV=1	2	49	M.(S)[Acetyl]ERQESGSAGSIKPSGGQDPSKKDVPAEDFDIDMGAPETEKAAVAIQS.Q	4958.37	Match	2989000	3061000
tr|Q3B732|Q3B732_DANRE	High mobility group nucleosomal-binding domain 2 OS=Danio rerio OX=7955 GN=hmgn2 PE=1 SV=1	51	76	K.KGSNPAE(N)[0.9885]GDAKADQAQKVDATGDAK.	2586.23	Match	8647000	3201000
tr|A0A2R8QN30|A0A2R8QN30_DANRE	Myelin protein zero OS=Danio rerio OX=7955 GN=mpz PE=1 SV=1	192	228	G.KGKEGSQQKQASAVTDPAKLKAAASEKKKQESRREKK.	4053.28	Match	3478000	3211000
tr|E7F0U0|E7F0U0_DANRE	Myelin basic protein OS=Danio rerio OX=7955 GN=mbpa PE=1 SV=2	2	31	M.(A)[Acetyl]TASTSGQNPFGLGRKKKAPGVLDQISRFF.G	3218.73	Match	46390000	3250000
tr|A4VAK4|A4VAK4_DANRE	Heat shock 27 kDa protein OS=Danio rerio OX=7955 GN=hspb1 PE=1 SV=1	175	199	A.PLPKPAIQAPEVNIPVNKTTVSTTK.	2642.52	Match	6759000	3404000
tr|A2BF67|A2BF67_DANRE	Endosulfine alpha b OS=Danio rerio OX=7955 GN=ensab PE=3 SV=1	76	117	K.MKNKQLPAAAGPDKNIVTGDHIPTPQDLPQRKSSLVTSKLAG.	4421.41	Match	7058000	3552000
tr|Q5XJK2|Q5XJK2_DANRE	Histone H2A OS=Danio rerio OX=7955 GN=h2ax1 PE=2 SV=1	105	128	A.QGGVLPNIQAVLLPKKTEKPAKSK.	2543.53	Match	4944000	3587000
tr|A0A0R4J7C3|A0A0R4J7C3_DANRE	Microtubule-associated protein OS=Danio rerio OX=7955 GN=map4l PE=1 SV=1	1	24	.(M)[Acetyl]DFSLRDAFTDGAPKAAQDGLMKR.D	2682.31	Match	10420000	3672000
sp|Q7ZUY3|H2AX_DANRE	Histone H2AX OS=Danio rerio OX=7955 GN=h2ax PE=2 SV=3	87	119	L.AVRNDEELNKLLGGVTIAQGGVLPNIQAVLLPK.K	3438.98	Match	3700000	3688000
tr|F1QDM6|F1QDM6_DANRE	Heat shock 10 protein 1 OS=Danio rerio OX=7955 GN=hspe1 PE=1 SV=1	1	19	.(M)[Acetyl]QAFRKFLPMFDRVLVERL.A	2436.32	Match	1827000	3713000
tr|F1QDM6|F1QDM6_DANRE	Heat shock 10 protein 1 OS=Danio rerio OX=7955 GN=hspe1 PE=1 SV=1	1	19	.(M)[Acetyl]QAFRKFLPMFDRVLVERL.A	2437.32	Match	5191000	3713000
sp|E7EZ53-2|GALA_DANRE	Isoform B of Galanin peptides OS=Danio rerio OX=7955 GN=gal	33	57	R.GWTLNSAGYLLG(PRRIDHLIQ)[235.0435]IKDT.P	3071.59	Match	7897000	3793000
tr|X1WCS1|X1WCS1_DANRE	Si:dkey-16p21.8 OS=Danio rerio OX=7955 GN=si:dkey-16p21.8 PE=3 SV=1	2	55	M.(S)[Acetyl]DSETAAPAETPVPAACVAIKADLDKCVKEKGEDGCKDLMEAFAAC(VKSNAEAS)[-4.0151].	5521.57	Match	4216000	3831000
tr|E7F0U0|E7F0U0_DANRE	Myelin basic protein OS=Danio rerio OX=7955 GN=mbpa PE=1 SV=2	2	27	M.(A)[Acetyl]TASTSGQNPFGLGRKKKAPGVLDQI.S	2682.46	Match	10690000	3850000
tr|E7EXD7|E7EXD7_DANRE	Histone H2A OS=Danio rerio OX=7955 GN=si:ch211-113a14.19 PE=3 SV=1	104	128	I.AQGGVLPNIQAVLLPKKTEKAAKGK.	2558.55	Match	5270000	3978000
tr|Q7SXM1|Q7SXM1_DANRE	Cytochrome c oxidase subunit OS=Danio rerio OX=7955 GN=cox6b2 PE=1 SV=1	2	86	M.(A)[Acetyl]DVIEEKIKNYRTAPFDARFPNTNQTRNCYQNYLDFHRCNKALSSKGQDTSP(CEWYQRVYKSLCPIS)[-4.0116]WVGKWDSQIEDGSFPGKI.	9987.82	Match	74600000	4060000
tr|A0A0R4J7C3|A0A0R4J7C3_DANRE	Microtubule-associated protein OS=Danio rerio OX=7955 GN=map4l PE=1 SV=1	683	710	K.GSTPTPVPSFGEGPRDSQGLDKRIPGTN.	2866.44	Match	6303000	4179000
sp|Q6NWF6|K2C8_DANRE	Keratin, type II cytoskeletal 8 OS=Danio rerio OX=7955 GN=krt8 PE=1 SV=1	458	520	Y.SSGYSSGLSGGYGGGYSGGYSGGYSSGSGYSDTVSQTKKSVVIKMIETKDGRVVSESSEVVQD.	6310.97	Match	7877000	4489000
tr|Q6P5L5|Q6P5L5_DANRE	NADH dehydrogenase [ubiquinone] 1 beta subcomplex subunit 8, mitochondrial OS=Danio rerio OX=7955 GN=ndufb8 PE=1 SV=1	145	188	F.MFGMGEVLPSYQPVAAKQYPYNNLYLERGGDPEKEPEPVKNYEI.	5060.48	Match	7055000	4627000
tr|F1R446|F1R446_DANRE	Spectrin alpha, non-erythrocytic 1 OS=Danio rerio OX=7955 GN=sptan1 PE=1 SV=1	1	26	.(M)[Acetyl]DISGVKVLETADDIQERRQQVLDRY.R	3118.6	Match	7531000	4817000
tr|Q7SZZ5|Q7SZZ5_DANRE	Vesicle-associated membrane protein 2 OS=Danio rerio OX=7955 GN=vamp2 PE=1 SV=1	2	64	M.(S)[Acetyl]APAGAPAPEGGNQAPPNLTSNRRLQQTQAQVDEVVDIMRVNVDKVLERDQKLSELDDRADAL.Q	6847.51	Match	4914000	4933000
tr|Q6P2B0|Q6P2B0_DANRE	VAMP (vesicle-associated membrane protein)-associated protein B and C OS=Danio rerio OX=7955 GN=vapb PE=1 SV=1	2	28	M.(A)[Acetyl]RPEQVLLLEPQHELRFRGPFTDVVTT.T	3189.72	Match	7421000	5012000
tr|A0A0R4J7C3|A0A0R4J7C3_DANRE	Microtubule-associated protein OS=Danio rerio OX=7955 GN=map4l PE=1 SV=1	521	561	R.SKIGSTDNMKYQPGGGKVSAAQGKTDALPKTSQGKVQIVHK.K	4239.27	Match	9197000	5225000
tr|A8WHV7|A8WHV7_DANRE	Mitochondrial ribosomal protein S36 OS=Danio rerio OX=7955 GN=mrps36 PE=1 SV=1	49	94	A.SLPQLSQSTAPSAASVSPPPRPPGPASRLPGTPDSIAVVRELPQRY.R	4731.55	Match	399600	5235000
tr|F8W3R0|F8W3R0_DANRE	Myelin basic protein OS=Danio rerio OX=7955 GN=mbpb PE=1 SV=1	2	28	M.(A)[Acetyl]SASSSQ(STFRLGRTK)[0.9951]KNPTVMDQIGK.F	2937.51	Match	12270000	5238000
tr|F1QTD1|F1QTD1_DANRE	Synenkephalin (Fragment) OS=Danio rerio OX=7955 GN=penkb PE=3 SV=1	202	215	R.GGLYDLESGVRELQ.K	1534.78	Match	4390000	5274000
tr|A9C462|A9C462_DANRE	Cytochrome c oxidase subunit OS=Danio rerio OX=7955 GN=cox6a1 PE=1 SV=1	78	108	R.SKRFPWGDGNKTLFHNPHVNALPDGYEHHDE.	3613.71	Match	10110000	5449000
tr|Q5XJK2|Q5XJK2_DANRE	Histone H2A OS=Danio rerio OX=7955 GN=h2ax1 PE=2 SV=1	104	128	I.AQGGVLPNIQAVLLPKKTEKPAKSK.	2614.57	Match	9526000	5592000
tr|A1A5Y7|A1A5Y7_DANRE	High mobility group nucleosomal-binding domain 7 OS=Danio rerio OX=7955 GN=hmgn7 PE=1 SV=1	23	95	L.SAKPTPPKPEPKPKKTPKKDKEVNDKKEDKKAKGKADESKEENQSENGETKTNEVEKTADEAAEGEKDDPKTE.	8087.1	Match	44850000	5868000
tr|A9C462|A9C462_DANRE	Cytochrome c oxidase subunit OS=Danio rerio OX=7955 GN=cox6a1 PE=1 SV=1	80	108	K.RFPWGDGNKTLFHNPHVNALPDGYEHHDE.	3398.58	Match	11760000	6053000
sp|Q90485|HBB2_DANRE	Hemoglobin subunit beta-2 OS=Danio rerio OX=7955 GN=ba2 PE=1 SV=3	2	31	M.VEWTDAERTAILGLWGKLNIDEIGPQALSR.C	3350.79	Match	6839000	6066000
tr|E7F0U0|E7F0U0_DANRE	Myelin basic protein OS=Danio rerio OX=7955 GN=mbpa PE=1 SV=2	18	100	K.KKAPGVLDQISRFFGGDKKRKGKGSFRGHLSSSPQRPHHSSTRRRGDVNPVVHFFRSFVSSPRPKSRGESRSRSPPKRWSTIF.	9438.12	Match	8142000	6194000
tr|Q568Q7|Q568Q7_DANRE	Stathmin OS=Danio rerio OX=7955 GN=stmn1b PE=1 SV=1	2	43	M.(A)[Acetyl]SSGADIQVKELDKRASGQAFEVILSPTAPDAKGEFPLSTPK.K	4397.31	Match	5621000	6475000
sp|Q1LYB6|ATF1B_DANRE	ATPase inhibitor B, mitochondrial OS=Danio rerio OX=7955 GN=atp5if1b PE=3 SV=1	45	107	A.GGAFGKKQAAEEEMYFKRKEQEQLSALRRHHQEEIDHHKKEIERLQHEITRHESKIKKLKHDD.	7667.03	Match	6835000	6489000
tr|E7EXD7|E7EXD7_DANRE	Histone H2A OS=Danio rerio OX=7955 GN=si:ch211-113a14.19 PE=3 SV=1	86	128	Q.LAVRNDEELNKLLGGVTIAQGGVLPNIQAVLLPKKTEKAAKGK.	4493.63	Match	14890000	6517000
tr|Q3B732|Q3B732_DANRE	High mobility group nucleosomal-binding domain 2 OS=Danio rerio OX=7955 GN=hmgn2 PE=1 SV=1	41	76	K.AAPKKAAKGKKGSNPAE(N)[0.9993]GDAKADQAQKVDATGDAK.	3536.84	Match	6846000	6577000
tr|Q4VBV1|Q4VBV1_DANRE	Cytochrome b-c1 complex subunit 7 OS=Danio rerio OX=7955 GN=uqcrb PE=1 SV=1	2	24	M.(A)[Acetyl]ARAPVAASGRFVDVFRKWYYNA.C	2656.38	Match	29670000	6757000
tr|Q3B732|Q3B732_DANRE	High mobility group nucleosomal-binding domain 2 OS=Danio rerio OX=7955 GN=hmgn2 PE=1 SV=1	49	76	K.GKKGSNPAENGDAKADQAQKVDATGDAK.	2770.37	Match	9970000	6886000
tr|E7F0U0|E7F0U0_DANRE	Myelin basic protein OS=Danio rerio OX=7955 GN=mbpa PE=1 SV=2	2	36	M.(A)[Acetyl]TASTSGQNPFGLGRKKKAPGVLDQISRFFGGDKK.R	3705	Match	753700	6941000
sp|Q9I8P3|NPY_DANRE	Pro-neuropeptide Y OS=Danio rerio OX=7955 GN=npy PE=3 SV=1	68	96	R.SSADTLISDLLIGETESRPQTRYEDHLAW.	3302.64	Match	10220000	7056000
sp|Q6NWF6|K2C8_DANRE	Keratin, type II cytoskeletal 8 OS=Danio rerio OX=7955 GN=krt8 PE=1 SV=1	11	39	Y.TVKSSSSGSIPRNFSSLSYSGPSMSRQSY.S	3083.48	Match	16940000	7140000
tr|Q5I2C7|Q5I2C7_DANRE	Myelin basic protein OS=Danio rerio OX=7955 GN=mbpa PE=1 SV=1	2	88	M.(A)[Acetyl]TASTSGQNPFGLGRKKKAPGVLDQISRFFGGDKKRKGKRPHHSSTRRRGDVNPVVHFFRSFVSSPRPKSRGESRSRSPPKRWSTIF.	9813.34	Match	31840000	7377000
tr|B3DFP9|B3DFP9_DANRE	Apolipoprotein A-II OS=Danio rerio OX=7955 GN=apoa2 PE=1 SV=1	94	141	S.ELEPVVDKARLNALGVYGHYFRPYVGAYLDSAINNVKPVLDTVLPQGN.	5282.8	Match	15850000	7462000
tr|F6NQC4|F6NQC4_DANRE	Neurogranin (protein kinase C substrate, RC3) a OS=Danio rerio OX=7955 GN=nrgna PE=4 SV=1	1	41	.(MDCRNEGCS)[40.0024]QPQDEDIMDIPLDDPAANKAAAKIQAGFRGHM.T	4498.01	Match	14870000	7567000
tr|Q6DH63|Q6DH63_DANRE	Cytochrome c oxidase subunit OS=Danio rerio OX=7955 GN=cox6b1 PE=1 SV=1	2	86	M.(A)[Acetyl]EDIKQKLENYRTAPFDARFPNQNQTRNC(WQNYLDYHRCQKALDAKGVDTAPCDWYKRVYKSLCPL)[-4.0096]SWIEKWDTQREEGNFPGKI.	10234	Match	103400000	7619000
tr|F1QPG3|F1QPG3_DANRE	Somatostatin 1, tandem duplicate 1 OS=Danio rerio OX=7955 GN=sst1.1 PE=3 SV=1	38	87	R.SLLSPAGKQELARYTLADLLSDLVQAENEALEPEDLSRAAEKDDVRLELE.R	5522.86	Match	14470000	8021000
tr|F8W3V8|F8W3V8_DANRE	Myelin basic protein OS=Danio rerio OX=7955 GN=mbpa PE=1 SV=1	83	107	K.SRWRELLGLGESRSRSPPKRWSTIF.	3000.64	Match	12630000	8318000
tr|Q5XJK2|Q5XJK2_DANRE	Histone H2A OS=Danio rerio OX=7955 GN=h2ax1 PE=2 SV=1	86	128	Q.LAVRNDEELNKLLGGVTIAQGGVLPNIQAVLLPKKTEKPAKSK.	4549.66	Match	21070000	8524000
tr|E7EXD7|E7EXD7_DANRE	Histone H2A OS=Danio rerio OX=7955 GN=si:ch211-113a14.19 PE=3 SV=1	87	128	L.AVRNDEELNKLLGGVTIAQGGVLPNIQAVLLPKKTEKAAKGK.	4380.55	Match	4835000	8711000
tr|E7F0U0|E7F0U0_DANRE	Myelin basic protein OS=Danio rerio OX=7955 GN=mbpa PE=1 SV=2	2	29	M.(A)[Acetyl]TASTSGQNPFGLGRKKKAPGVLDQISR.F	2925.6	Match	23120000	8928000
tr|E9QFA6|E9QFA6_DANRE	Cytochrome c oxidase subunit 8A OS=Danio rerio OX=7955 GN=cox8a PE=3 SV=1	28	76	N.LVTRPAKEALGPVETTAALAIFTLAIL(G)[16.0069]PAGWVLSNLENYKKRDSVESE.	5253.85	Match	15470000	9612000
tr|A1A5Y7|A1A5Y7_DANRE	High mobility group nucleosomal-binding domain 7 OS=Danio rerio OX=7955 GN=hmgn7 PE=1 SV=1	22	95	R.LSAKPTPPKPEPKPKKTPKKDKEVNDKKEDKKAKGKADESKEENQSENGETKTNEVEKTADEAAEGEKDDPKTE.	8200.18	Match	35510000	9649000
tr|Q45NF8|Q45NF8_DANRE	Pcp4a OS=Danio rerio OX=7955 GN=pcp4a PE=1 SV=1	2	51	M.(S)[Acetyl]ERQESGSAGSIKPSGGQDPSKKDVPAEDFDIDMGAPETEKAAVAIQSQF.R	5233.51	Match	12670000	10180000
tr|E7F0U0|E7F0U0_DANRE	Myelin basic protein OS=Danio rerio OX=7955 GN=mbpa PE=1 SV=2	2	30	M.(A)[Acetyl]TASTSGQNPFGLGRKKKAPGVLDQISRF.F	3072.66	Match	32650000	11070000
tr|A0A0R4ILK7|A0A0R4ILK7_DANRE	Si:ch73-119p20.1 OS=Danio rerio OX=7955 GN=si:ch73-119p20.1 PE=4 SV=1	45	91	G.(STNQQGAAESAGSCCETLESLKPFLI)[-70.9548]GGAVIALGAVLVGVILLAKKN.	4569.4	Match	2846000	11120000
tr|Q7ZUX8|Q7ZUX8_DANRE	Dynein light chain roadblock OS=Danio rerio OX=7955 GN=dynlrb1 PE=1 SV=1	2	96	M.(A)[Acetyl]EVEETIKRIQSQKGVQGIIIVNAEGIPIKSTLDNTSTVQYAANIHQLLMKARGIVRDIDPQNDLTFLRVRSKKNEIMIAPDKDYFLIVIQNPTE.	10753.8	Match	69010000	11630000
tr|F8W3W8|F8W3W8_DANRE	Myelin basic protein OS=Danio rerio OX=7955 GN=mbpa PE=1 SV=1	2	95	M.(A)[Acetyl]TASTSGQNPFGLGRKKKAPGVLDQISRFFGGDKKRKGKRPHHSSTRRRGDVNPVVHFFRSFVSSPRPKSRWRELLGLGESRSRSPPKRWSTIF.	10680.8	Match	47530000	12730000
tr|E7FAE7|E7FAE7_DANRE	Si:ch211-105c13.3 OS=Danio rerio OX=7955 GN=si:ch211-105c13.3 PE=1 SV=1	1	91	.(M)[Acetyl]EGAIKTVVMQYLSSARGKENLGGKNFQKLVQSQLGNILSDTESSSAVKEMMRGLDDNQDGKVSFQEYMTLVGYLATSLSEQKASGQEDKH.	9999.95	Match	18610000	13440000
tr|Q6PC77|Q6PC77_DANRE	ATP synthase subunit d, mitochondrial OS=Danio rerio OX=7955 GN=atp5pd PE=1 SV=1	137	161	L.NNTFPETKLDKQKYPYWPYKPVADL.	3054.57	Match	23030000	13570000
tr|X1WFU9|X1WFU9_DANRE	Si:dkey-276j7.1 (Fragment) OS=Danio rerio OX=7955 GN=si:dkey-276j7.1 PE=1 SV=1	2	33	M.(AAEPNYRRTKPAQNASSN)[455.2465]GAVGPSSQIPGLSA.T	3650.86	Match	17730000	13580000
tr|X1WCS1|X1WCS1_DANRE	Si:dkey-16p21.8 OS=Danio rerio OX=7955 GN=si:dkey-16p21.8 PE=3 SV=1	2	55	M.(S)[Acetyl]DSETAAPAETPV(PAACVAIKADLDKCVKEKGEDGCKDLMEAFAACVKSNAEAS)[10.0020].	5535.57	Match	15860000	13910000
tr|F6NQC4|F6NQC4_DANRE	Neurogranin (protein kinase C substrate, RC3) a OS=Danio rerio OX=7955 GN=nrgna PE=4 SV=1	1	43	.(MDCRNEGC)[40.0022]SQPQDEDIMDIPLDDPAANKAAAKIQAGFRGHMTR.K	4755.17	Match	16330000	13960000
tr|Q6PBJ8|Q6PBJ8_DANRE	Peptidylprolyl isomerase OS=Danio rerio OX=7955 GN=fkbp1aa PE=1 SV=1	67	108	Q.MSV(GQRAKLTCTPDFAYGSKGHPGV)[174.0433]IPPNATLIFDVELIGLE.	4615.34	Match	27710000	14060000
tr|B3DFP9|B3DFP9_DANRE	Apolipoprotein A-II OS=Danio rerio OX=7955 GN=apoa2 PE=1 SV=1	21	54	Q.(E)[111.0497]WPVPDKELVDKYDGLRTVFIKRLVNAWEKIKTA.V	4167.27	Match	17390000	14070000
tr|E7F0U0|E7F0U0_DANRE	Myelin basic protein OS=Danio rerio OX=7955 GN=mbpa PE=1 SV=2	2	37	M.(A)[Acetyl]TASTSGQNPFGLGRKKKAPGVLDQISRFFGGDKKR.K	3861.11	Match	35050000	14600000
sp|Q6PI52|CALM_DANRE	Calmodulin OS=Danio rerio OX=7955 GN=calm1a PE=2 SV=3	2	76	M.(A)[Acetyl]DQLTEEQIAEFKEAFSLFDKDGDGTITTKELGTVMRSLGQNPTEAELQDMINEV(DADGNGTIDFPEFLTMMARK)[37.2582].M	8390.96	Match	9759000	15010000
tr|F1QK17|F1QK17_DANRE	Sperm autoantigenic protein 17 OS=Danio rerio OX=7955 GN=spa17 PE=4 SV=1	559	646	T.(DISEPKEEC)[-30.1145]SQPQEEEDIMDIPLDDPEANKAAAKIQAGFRGHMTRKKMKPGEKPGEEVSSSGEALNGSQGDSGGTDGVETDGTSGPEQ.	9210.14	Match	7736000	15660000
tr|A1A5Y7|A1A5Y7_DANRE	High mobility group nucleosomal-binding domain 7 OS=Danio rerio OX=7955 GN=hmgn7 PE=1 SV=1	19	95	R.SARLSAKPTPPKPEPKPKKTPKKDKEVNDKKEDKKAKGKADESKEENQSENGETKTNEVEKTADEAAEGEKDDPKTE.	8515.36	Match	79980000	16240000
tr|Q5XJK2|Q5XJK2_DANRE	Histone H2A OS=Danio rerio OX=7955 GN=h2ax1 PE=2 SV=1	87	128	L.AVRNDEELNKLLGGVTIAQGGVLPNIQAVLLPKKTEKPAKSK.	4436.58	Match	3246000	17350000
tr|A0A0R4IHW0|A0A0R4IHW0_DANRE	Cholecystokinin b OS=Danio rerio OX=7955 GN=cckb PE=3 SV=1	39	77	R.SASLTLQQPLPPAGDIQPDTRANLSQLLAKLISSKKGSV.R	4042.27	Match	37340000	17390000
tr|Q6PBR5|Q6PBR5_DANRE	V-type proton ATPase subunit G OS=Danio rerio OX=7955 GN=atp6v1g1 PE=1 SV=1	2	26	M.(A)[Acetyl]SQSQGIQQLLQAEKRAAEKVAEAR.K	2751.47	Match	28530000	17420000
tr|E7FD23|E7FD23_DANRE	Si:dkey-276j7.1 OS=Danio rerio OX=7955 GN=si:dkey-276j7.1 PE=1 SV=1	2	52	M.(A)[Acetyl]AEPNYRRTKPGVKQAQNASSNGAVGPSSQIPGLSATAETTPEERTKGRRV.G	5361.77	Match	32240000	18360000
tr|A0A0R4IBX9|A0A0R4IBX9_DANRE	Si:ch73-1a9.3 OS=Danio rerio OX=7955 GN=si:ch73-1a9.3 PE=3 SV=1	2	87	M.PKRSKANNDAEV(SEPKRRSERLVNKPA)[-13.9889]PPKAEPKPKKAPAKPKKTKEPKEPKEEEKKEEVPAENGETKADDDASATEDGDKKEDGE.	9495.94	Match	106600000	18600000
tr|Q5XJK2|Q5XJK2_DANRE	Histone H2A OS=Danio rerio OX=7955 GN=h2ax1 PE=2 SV=1	83	128	R.HLQLAVRNDEELNKLLGGVTIAQGGVLPNIQAVLLPKKTEKPAKSK.	4927.86	Match	39140000	19680000
tr|B3DFP9|B3DFP9_DANRE	Apolipoprotein A-II OS=Danio rerio OX=7955 GN=apoa2 PE=1 SV=1	106	141	N.ALGVYGHYFRPYVGAYLDSAINNVKPVLDTVLPQGN.	3920.06	Match	26510000	20570000
tr|Q5XJK2|Q5XJK2_DANRE	Histone H2A OS=Danio rerio OX=7955 GN=h2ax1 PE=2 SV=1	2	128	M.(S)[Acetyl]GRGKTGGKARAKAKSRSSRAGLQFPVGRVHRLLRKGNYAERVGAGAPVYLAAVLEYLTAEILELAGNAARDNKKTRIIPRHLQLAVRNDEELNKLLGGVTIAQGGVLPNIQAVLLPKKTEKPAKSK.	13632.8	Match	139100000	20730000
tr|E7F0U0|E7F0U0_DANRE	Myelin basic protein OS=Danio rerio OX=7955 GN=mbpa PE=1 SV=2	2	31	M.(A)[Acetyl]TASTSGQNPFGLGRKKKAPGVLDQISRFF.G	3219.73	Match	46390000	22760000
tr|A0JMK6|A0JMK6_DANRE	Secretogranin II OS=Danio rerio OX=7955 GN=scg2b PE=2 SV=1	537	583	R.DTQGKEEPEGPQKPPAQDPAQETVDQTPPESGTEDGKEYHGKIVAGM.	5002.34	Match	40990000	22820000
tr|Q45NF8|Q45NF8_DANRE	Pcp4a OS=Danio rerio OX=7955 GN=pcp4a PE=1 SV=1	2	48	M.(S)[Acetyl]ERQESGSAGSIKPSGGQDPSKKDVPAEDFDIDMGAPETEKAAVAIQ.S	4871.35	Match	31780000	22840000
tr|A0A2R8RP85|A0A2R8RP85_DANRE	Synuclein, gamma b (breast cancer-specific protein 1) OS=Danio rerio OX=7955 GN=sncgb PE=1 SV=1	1	92	.(M)[Acetyl]DVLMKGFSMAKEGVVAAAEKTKAGVEEAALKTKEGVMYVGNKTKEGMVSGVNTVVQKTTDQANIVGETAVGGANVAGQNTVEGLENVAAST.G	9354.76	Match	48910000	24830000
tr|B3DFP9|B3DFP9_DANRE	Apolipoprotein A-II OS=Danio rerio OX=7955 GN=apoa2 PE=1 SV=1	103	141	A.RLNALGVYGHYFRPYVGAYLDSAINNVKPVLDTVLPQGN.	4302.28	Match	1774000	25510000
tr|B3DFP9|B3DFP9_DANRE	Apolipoprotein A-II OS=Danio rerio OX=7955 GN=apoa2 PE=1 SV=1	103	141	A.RLNALGVYGHYFRPYVGAYLDSAINNVKPVLDTVLPQGN.	4303.28	Match	53120000	25510000
tr|E7F0U0|E7F0U0_DANRE	Myelin basic protein OS=Danio rerio OX=7955 GN=mbpa PE=1 SV=2	2	100	M.(A)[Acetyl]TASTSGQNPFGLGRKKKAPGVLDQISRFFGGDKKRKGKGSFRGHLSSSPQRPHHSSTRRRGDVNPVVHFFRSFVSSPRPKSRGESRSRSPPKRWSTIF.	11054.9	Match	145800000	27220000
tr|Q6PBP0|Q6PBP0_DANRE	Cytochrome c oxidase polypeptide VIIc OS=Danio rerio OX=7955 GN=cox7c PE=1 SV=1	17	63	S.SHYAEGPGKNLPFSVENKWRLLGMMVLFFGSGFAFPFIVVRHQILKK.	5390.9	Match	55130000	27740000
tr|A8WGC6|A8WGC6_DANRE	ATP synthase subunit beta OS=Danio rerio OX=7955 GN=atp5f1b PE=1 SV=1	496	517	A.FYMVGPIEEVVQKAEKLAEEHS.	2531.26	Match	1123000	31870000
tr|A8WGC6|A8WGC6_DANRE	ATP synthase subunit beta OS=Danio rerio OX=7955 GN=atp5f1b PE=1 SV=1	496	517	A.FYMVGPIEEVVQKAEKLAEEHS.	2532.27	Match	36710000	31870000
tr|A0A097|A0A097_DANRE	Thymosin beta OS=Danio rerio OX=7955 GN=tmsb1 PE=1 SV=1	2	46	M.(S)[Acetyl]DNPVKAEVQNFD(KKCLKKTNTE)[305.0913]EKNVLPTKEDIEQEKKAGEGAK.	5404.7	Match	56170000	35960000
tr|E7F9R1|E7F9R1_DANRE	Sodium/potassium-transporting ATPase subunit beta OS=Danio rerio OX=7955 GN=atp1b4 PE=1 SV=1	1	23	.(M)[Acetyl]ERDSTAGGAEDLLLEDKVSKLR.A	2574.31	Match	78430000	37880000
sp|Q5BJA5|H2B1_DANRE	Histone H2B 1/2 OS=Danio rerio OX=7955 GN=zgc:112234 PE=2 SV=3	86	124	R.STITSREIQTAVRLLLPGELAKHAVSEGTKAVTKYTSSK.	4170.33	Match	64120000	40010000
tr|A0A0R4J7C3|A0A0R4J7C3_DANRE	Microtubule-associated protein OS=Danio rerio OX=7955 GN=map4l PE=1 SV=1	1	52	.(M)[Acetyl]DFSLRDAFTDGAPKAAQDGLMKRDFVAGLEAQSFDDKVGETVGKTDYRPLL.D	5732.83	Match	47080000	40350000
tr|A0A0R4IAI1|A0A0R4IAI1_DANRE	Vir-like m6A methyltransferase-associated OS=Danio rerio OX=7955 GN=virma PE=1 SV=1	1049	1155	R.VPSVCVTLHKILCSTPSTGRLDAEELRIQGDVTEILLTFTHAVSEQETGSEETVAGNSWSLMLKEVLNSILAAPENIYSSLSLLSELLPLPLPMQTTQALSVQDIGV.A	11484	Match	79540000	40830000
tr|A0A0R4IBX9|A0A0R4IBX9_DANRE	Si:ch73-1a9.3 OS=Danio rerio OX=7955 GN=si:ch73-1a9.3 PE=3 SV=1	39	87	K.APAKPKKTKEPKEPKEEEKKEEVPAENGETKADDDASATEDGDKKEDGE.	5351.59	Match	62530000	41840000
tr|Q45QT2|Q45QT2_DANRE	Thymosin beta OS=Danio rerio OX=7955 GN=tmsb4x PE=1 SV=1	2	44	M.(S)[Acetyl]DKPNLEEVTSFDKTKLKKTETQEKNPL(PSKETIEQEKQAGSS)[37.9625].	4926.46	Match	53820000	44440000
tr|F8W3V8|F8W3V8_DANRE	Myelin basic protein OS=Danio rerio OX=7955 GN=mbpa PE=1 SV=1	2	107	M.(A)[Acetyl]TASTSGQNPFGLGRKKKAPGVLDQISRFFGGDKKRKGKGSFRGHLSSSPQRPHHSSTRRRGDVNPVVHFFRSFVSSPRPKSRWRELLGLGESRSRSPPKRWSTIF.	11921.5	Match	163500000	48200000
sp|Q6NWH2|MRPB_DANRE	MARCKS-related protein 1-B OS=Danio rerio OX=7955 GN=marcksl1b PE=2 SV=1	112	207	L.KKSKKNAEVKEEAAAAAPATEEKPEENGAATEEKKEEEAKAEETPAAPVETPKAEEPAAKAEEPAAAKEEAAAPAVEATKQTEETNSTPAPSEQKE.	10005.9	Match	84700000	55430000
tr|A0A2R8PY84|A0A2R8PY84_DANRE	Purkinje cell protein 4 OS=Danio rerio OX=7955 PE=4 SV=1	2	63	M.(S)[Acetyl]QRQGSGAAGGNSKTSGAQDASKKDVPEDFDIDMDAPETEKAAVAIQSQFRKFQKKKNDDKS.	6685.26	Match	89980000	55500000
tr|Q3B732|Q3B732_DANRE	High mobility group nucleosomal-binding domain 2 OS=Danio rerio OX=7955 GN=hmgn2 PE=1 SV=1	45	76	K.KAAKGKKGSNPAE(N)[0.9943]GDAKADQAQKVDATGDAK.	3169.61	Match	73940000	57930000
tr|Q7T133|Q7T133_DANRE	Novel protein OS=Danio rerio OX=7955 GN=pcp4l1 PE=2 SV=1	2	71	M.(S)[Acetyl]ENSSSDPPNSTQGPITDDKAAQEKLESKGANPPTQEPEEEIDIDLEAPETEKAALAIQNQFRRFQKKKK.	7789.86	Match	80960000	57980000
sp|Q1LYB6|ATF1B_DANRE	ATPase inhibitor B, mitochondrial OS=Danio rerio OX=7955 GN=atp5if1b PE=3 SV=1	20	107	M.SSDQLGELGKGAGKGGGGGGAVRQAGGAFGKKQAAEEEMYFKRKEQEQLSALRRHHQEEIDHHKKEIERLQHEITRHESKIKKLKHDD.	9862.12	Match	159600000	59150000
tr|Q804W1|Q804W1_DANRE	Parvalbumin 6 OS=Danio rerio OX=7955 GN=pvalb6 PE=1 SV=1	2	109	M.(A)[Acetyl]MSSILNHDDIKKALDACKAPDSFNHKSFFEMVGLKAKASDDVKKAFHLLDADNSGFIEEEELKFVLKAFATDGRDLTDKETKAFLQAADKDGDGKIGAEEFAALVRE.	11887	Match	61410000	63570000
sp|A5PLC8|PTMAB_DANRE	Prothymosin alpha-B OS=Danio rerio OX=7955 GN=ptmab PE=1 SV=1	2	106	M.(A)[Acetyl]DAKVDSATEISAKDLKEKKLIEEKENGKDATNGKENEENGEPEIDDEDDDEVDEDDEEGEGDEDEDEDDDDEDLGGGTKRGADDDEDEDEDDEDDVDPKKQKVN.	11683.9	Match	69300000	69180000
tr|Q45NF8|Q45NF8_DANRE	Pcp4a OS=Danio rerio OX=7955 GN=pcp4a PE=1 SV=1	2	63	M.(S)[Acetyl]ERQESGSAGSIKPSGGQDPSKKDVPAEDFDIDMGAPETEKAAVAIQSQFRKFQKKKQTVKS.	6719.41	Match	144100000	73090000
tr|F6NXD5|F6NXD5_DANRE	Myristoylated alanine-rich protein kinase C substrate b OS=Danio rerio OX=7955 GN=marcksb PE=1 SV=1	122	227	F.KLSGFSFKKSAKKEAEGGEAAAATAENGEQKKDAEPEEAKPEASSEEAKAETPAEEPKAEEPKAESSEEKPASEVAEEKPAEEKQEAAPQEPAAAESSEAPAAATE.	10964.2	Match	168500000	73580000
tr|A0A0R4ITV0|A0A0R4ITV0_DANRE	Si:dkey-46i9.1 OS=Danio rerio OX=7955 GN=si:dkey-46i9.1 PE=4 SV=1	2	65	M.(S)[Acetyl]ERGHTGQANSSQTSNTDNKEKASDSAGKPEQEEEIDIDLEAPETEKAALAIQNQFRRFQKKKK.	7184.57	Match	161900000	89110000
sp|Q6PD99|MRPA_DANRE	MARCKS-related protein 1-A OS=Danio rerio OX=7955 GN=marcksl1a PE=2 SV=1	104	213	F.KGISLKKNKKASEEAAEAVATPTTAEDKPEENGQAATETKEEEPAAETNETPAPEAEAEPKVEEAEPKAEEPAQQTETAPTEETTKSEESPAPVEETTPTESSDPEPAAE.	11582.5	Match	51670000	90410000
tr|E7FD23|E7FD23_DANRE	Si:dkey-276j7.1 OS=Danio rerio OX=7955 GN=si:dkey-276j7.1 PE=1 SV=1	2	56	M.(A)[Acetyl]AEPNYRRTKPGVKQAQNASSNGAVGPSSQIPGLSATAETTPEERTKGRRVGIQA.S	5730.98	Match	159900000	96090000
sp|O73872|SODC_DANRE	Superoxide dismutase [Cu-Zn] OS=Danio rerio OX=7955 GN=sod1 PE=2 SV=1	2	154	M.VNKAVCVLKGTGEVTGTVYFNQEGEKKPVKVTGEITGLTPGKHGFHVHAFGDN(TNGCISAGPHFNPHDKTHGGPTDSVRHVGDLGNVTADASGVAKIEIEDAMLTLSGQHSIIGRTMVIHEKEDDLGKGGNEESLKTGNAGGRLACGVIGITQ)[-1.9978].	15810	Match	446200000	104900000
sp|Q6NWH2|MRPB_DANRE	MARCKS-related protein 1-B OS=Danio rerio OX=7955 GN=marcksl1b PE=2 SV=1	99	207	F.SLKNSFKFKGISLKKSKKNAEVKEEAAAAAPATEEKPEENGAATEEKKEEEAKAEETPAAPVETPKAEEPAAKAEEPAAAKEEAAAPAVEATKQTEETNSTPAPSEQKE.	11454.8	Match	177100000	116200000
tr|Q6PBR5|Q6PBR5_DANRE	V-type proton ATPase subunit G OS=Danio rerio OX=7955 GN=atp6v1g1 PE=1 SV=1	2	30	M.(A)[Acetyl]SQSQGIQQLLQAEKRAAEKVAEARKRKN.R	3277.82	Match	209200000	116400000
tr|F1Q9A4|F1Q9A4_DANRE	Cytochrome c oxidase subunit 7A2a OS=Danio rerio OX=7955 GN=cox7a2a PE=1 SV=1	24	83	Q.LENKVPNKQKLFQEDNDLPVHLKGGLTDGLLYRLTMALTIFGSGYVVYTLFDAAMPKKKD.	6752.61	Match	236100000	119600000
tr|Q45NF8|Q45NF8_DANRE	Pcp4a OS=Danio rerio OX=7955 GN=pcp4a PE=1 SV=1	2	56	M.(S)[Acetyl]ERQESGSAGSIKPSGGQDPSKKDVPAEDFDIDMGAPETEKAAVAIQSQFRKFQK.K	5919.92	Match	218100000	121700000
sp|Q6NWH2|MRPB_DANRE	MARCKS-related protein 1-B OS=Danio rerio OX=7955 GN=marcksl1b PE=2 SV=1	1	95	.(MGSQASKGGVAVE)[82.1393]GKAAAADPAAVKTNGQENGHVKTNGDVSAKAEGDAATTNGSAEAAKESEAGAGDAIEPAPAAEGEAAKPEGEATKETPKKKK.K	9207.63	Match	197600000	133800000
tr|A3KPR4|A3KPR4_DANRE	Histone H4 OS=Danio rerio OX=7955 GN=hist1h4l PE=2 SV=1	1	103	.(M)[Acetyl]SGRGKGGKGLG(KGGAKRHRKVLRDNIQGI)[-102.9724]TKPAIRRLARRGGVKRISGLIYEETRGVLKVFLENVIRDAVTYTEHAKRKTVTAMDVVYALKRQGRTLYGFGG.	11299.5	Match	335300000	136800000
tr|B8A6B8|B8A6B8_DANRE	Thymosin beta OS=Danio rerio OX=7955 GN=tmsb2 PE=1 SV=1	2	45	M.(S)[Acetyl]DKPDLTEIARFDKTKLKKTETKEKNPLPTKETIEQERKGDA(T)[79.9851]P.	5175.7	Match	220300000	144300000
tr|Q4V8S5|Q4V8S5_DANRE	Acbd7 protein OS=Danio rerio OX=7955 GN=acbd7 PE=1 SV=1	2	88	M.TLKAEFDQYAEDVKKVKTRPTDQELLDLYGLYKQAVVGDINIDKPGMIDLKGKAKWDAWDSRKGMSTEDAMKAYITLAKQAIEKYGK.	9881.17	Match	381000000	157000000
sp|Q6PD99|MRPA_DANRE	MARCKS-related protein 1-A OS=Danio rerio OX=7955 GN=marcksl1a PE=2 SV=1	1	95	.MGAQLTKGEATVEGK(AVADKANGQENG)[82.1353]HVKTNGDVSTKPDGEAVAADGNGTAEVAKDEAPKTEEGDGIEAAPATEAEASKSDGEAAKETKKKKKF.S	9647.83	Match	307700000	167700000
tr|X1WER9|X1WER9_DANRE	Cytochrome c oxidase subunit 8B OS=Danio rerio OX=7955 GN=cox8b PE=3 SV=1	25	73	N.ITAKPAKHALSAGEQVIALSVMFVTILGPSGWILSHLEDYKHRPGAAQE.	5236.81	Match	269000000	182200000
tr|F6NQC4|F6NQC4_DANRE	Neurogranin (protein kinase C substrate, RC3) a OS=Danio rerio OX=7955 GN=nrgna PE=4 SV=1	1	60	.(MDCRNEGC)[39.9978]SQPQDEDIMDIPLDDPAANKAAAKIQAGFRGHMTRKKMKDDKPREEKQREPK.	6906.33	Match	436000000	189200000
tr|E9QFA6|E9QFA6_DANRE	Cytochrome c oxidase subunit 8A OS=Danio rerio OX=7955 GN=cox8a PE=3 SV=1	28	76	N.LVTRPAKEALGPVETTAALAIFTLAILGPAGWVLSNLENYKKRDSVESE.	5236.86	Match	517900000	215100000
tr|Q6P5L2|Q6P5L2_DANRE	Diazepam-binding inhibitor (GABA receptor modulator, acyl-CoA binding protein) OS=Danio rerio OX=7955 GN=dbi PE=1 SV=1	2	87	M.(S)[Acetyl]EAEFQKAAEEVKQLKAKPTDAEMLEIYSLYKQATVGDVNTARPGMLDFTGKAKWDAWDAKKGTSKEDAVKAYIAKVEELKGKYGI.	9565.97	Match	406100000	219500000
tr|Q7SX92|Q7SX92_DANRE	Beta-synuclein OS=Danio rerio OX=7955 GN=sncb PE=1 SV=1	1	127	.(M)[Acetyl]DVFMKGLSKAKEGMAVAAEKTKEGVAVAAEKTKEGVMFVGSKTKDSVATVAEKTKEQASQLGGAVMSGAGNIAAATGLVKKDEFPSDMNPEFGQEATEEPGEGLMDPEGQTYDDNQQ(ESQDYEPEA)[17.1449].	13391.4	Match	318600000	241500000
tr|A0A2R8RR55|A0A2R8RR55_DANRE	Uncharacterized protein OS=Danio rerio OX=7955 PE=4 SV=1	229	307	G.MQIFVKTLTGKTITLEVEPSDTIENVKAKIQDKEGIPPDQQRLIFAGKQLEDGRTLSD(YNIQ)[-342.2277]KESTLHLVLRLRGGTKI.	8559.67	Match	1211000000	271500000
tr|Q45QT2|Q45QT2_DANRE	Thymosin beta OS=Danio rerio OX=7955 GN=tmsb4x PE=1 SV=1	2	44	M.(S)[Acetyl]DKPNLEEVTSFDKTKLK(KTETQEK)[79.9766]NPLPSKETIEQEKQAGSS.	4968.48	Match	481200000	296000000
tr|E9QDI1|E9QDI1_DANRE	Apolipoprotein C-I OS=Danio rerio OX=7955 GN=apoc1 PE=1 SV=1	22	85	A.(QE)[-17.0207]EPTLEQHFTKFGTQMKEIAEDLADKTKTAFQNIEQSELGTKTRNWFNDQYEKLKQKMTETFN.	7623.73	Match	547600000	301800000
tr|Q568R9|Q568R9_DANRE	Gamma1b-synuclein OS=Danio rerio OX=7955 GN=sncga PE=1 SV=1	1	111	.(M)[Acetyl]DALKKGFSIAKEGVVAAAEKTKAGVEEAAAKTKEGVMYVGTKTKEGVATSVNTVAQKTTDQANLMSDTAVAGANEVSEKAVEGLETMVASAGLVKPGVVKHEEQPADAGQ.	11299.8	Match	323600000	321100000
sp|Q6NWH2|MRPB_DANRE	MARCKS-related protein 1-B OS=Danio rerio OX=7955 GN=marcksl1b PE=2 SV=1	1	99	.(M)[Acetyl]GSQASKGGVAVEGKAAAADPAAVKTNGQENGHVKTNGDVSAKA(EGD)[39.0700]AATTNGSAEAAKESEAGAGDAIEPAPAAEGEAAK(PEGEATKETPKKKKKKF)[-7.0511]S.L	9689.86	Match	473000000	335900000
tr|B8A6B8|B8A6B8_DANRE	Thymosin beta OS=Danio rerio OX=7955 GN=tmsb2 PE=1 SV=1	2	45	M.(S)[Acetyl]DKPDLTEIARFDKTKLKKTETKEKNPLPTKETIEQERKGDATP.	5095.73	Match	646900000	432100000
tr|Q6XG62|Q6XG62_DANRE	Protein S100 OS=Danio rerio OX=7955 GN=icn PE=1 SV=1	2	95	M.(A)[Acetyl]TSDTQKAMAMLIATFHKYSGKEGDKLTLSKGELKELLSAELGDIFGKTTDKAALDKIFKDLDANADGSVDFQEYITLIACITMLCNEFFTGKK.	10311.3	Match	1182000000	504900000
sp|Q6NWH2|MRPB_DANRE	MARCKS-related protein 1-B OS=Danio rerio OX=7955 GN=marcksl1b PE=2 SV=1	107	207	F.KGISLKKSKKNAEVKEEAAAAAPATEEKPEENGAATEEKKEEEAKAEETPAAPVETPKAEEPAAKAEEPAAAKEEAAAPAVEATKQTEETNSTPAPSEQKE.	10504.3	Match	643000000	515200000
sp|Q804W2|PRV7_DANRE	Parvalbumin-7 OS=Danio rerio OX=7955 GN=pvalb7 PE=3 SV=3	2	109	M.(A)[Acetyl]MKNLLKDDDIKKALDQFKAADSFDHKKFFDVVGLKALSADNVKLVFKALDVDASGFIEEEELKFVLKGFSADGRDLTDKETKAFLAAADKDGDGKIGIDEFEALVHE.	11931.2	Match	1070000000	703800000
sp|Q6PI52|CALM_DANRE	Calmodulin OS=Danio rerio OX=7955 GN=calm1a PE=2 SV=3	2	149	M.(A)[Acetyl]DQLTEEQIAEFKEAFSLFDKDGDGTITTKELGTVMRSLGQNPTEAELQDMINE(VDADGNGTIDFPEFLTMMARKMKDTDSEEEIREAFRVFDKDGNGYISAA)[39.6100]ELRHVMTNLGEKLTDEEVDEMIREADIDGDGQVNYEEFVQMMTAK.	16776.9	Match	4729000000	805100000
sp|Q6NWH2|MRPB_DANRE	MARCKS-related protein 1-B OS=Danio rerio OX=7955 GN=marcksl1b PE=2 SV=1	2	98	M.(GSQAS)[212.1758]KGGVAVEGKAAAADPAAVKTNGQENGHVKTNGDVSAKAEGDAATTNGSAEAAKESEAGAGDAIEPAPAAEGEAAKPEGEATKETPKKKKKKF.S	9609.88	Match	1255000000	946200000
tr|A0A0R4ILK7|A0A0R4ILK7_DANRE	Si:ch73-119p20.1 OS=Danio rerio OX=7955 GN=si:ch73-119p20.1 PE=4 SV=1	1	91	.(M)[Acetyl]EAKAKGAPKSASKAEKKEAAPPPAKPDPVPAEPTEPEKPAEDGSTNQQGAAESAGS(CCETL)[-2.0008]ESLKPFLIGGAVIALGAVLVGVILLAKKN.	9138.8	Match	1994000000	985200000
tr|Q45QT2|Q45QT2_DANRE	Thymosin beta OS=Danio rerio OX=7955 GN=tmsb4x PE=1 SV=1	2	44	M.(S)[Acetyl]DKPNLEEVTSFDKTKLKKTETQEKNPLPSKETIEQEKQAGSS.	4888.51	Match	5675000000	3552000000
sp|Q6PI52|CALM_DANRE	Calmodulin OS=Danio rerio OX=7955 GN=calm1a PE=2 SV=3	2	149	M.(A)[Acetyl]DQLTEEQIAEFKEAFSLFDKDGDGTITTKELGTVMRSLGQNPTEAELQDMINEVDADGNGTIDF(PEFLTMMARKMKDTDSEEEIREA)[42.0555]FRVFDKDGNGYISAAELRHVMTNLGEKLTDEEVDEMIREADIDGDGQVNYEEFVQMMTAK.	16779.9	Match	4729000000	3580000000
sp|A3KNL5|ATF1A_DANRE	ATPase inhibitor A, mitochondrial OS=Danio rerio OX=7955 GN=atp5if1a PE=3 SV=1	41	105	R.AAGGSFGRREAAEEERYFRQKEREQLAALKNHHEEEIDHHKKEIERLQREIDRHKGKIRKLKHDD.	7879.15	No match		3237000
tr|E7F0U0|E7F0U0_DANRE	Myelin basic protein OS=Danio rerio OX=7955 GN=mbpa PE=1 SV=2	17	100	R.KKKAPGVLDQISRFFGGDKKRKGKGSFRGHLSSSPQRPHHSSTRRRGDVNPVVHFFRSFVSSPRPKSRGESRSRSPPKRWSTIF.	9567.23	No match		33900000
tr|Q1MT43|Q1MT43_DANRE	Angiopoietin-1 OS=Danio rerio OX=7955 GN=angpt1 PE=4 SV=2	1	102	.MWWGCLFLAALLVVADCGGVEQKTDGLRSSTPKSNSSSGRRYHRIQHGQCSYTFILPESDGNTCREFKSGTAYNANALQRDAPQPEADLSNQKIQQLEHVME.N	11341.5	No match		44320000
tr|A0A140LG23|A0A140LG23_DANRE	Histone H3 OS=Danio rerio OX=7955 GN=hist2h3ca1 PE=3 SV=1	31	136	A.PATGGVKKPHRYRPGTVALREIRRYQK(STE)[267.2735]LLIRKLPFQRLVREIAQDFKTDQRFQSSAVMALQEASEAYLVGLFEDTNLCAIHAKRVTIMPKDIQLARRIRGERA.	12481	No match		12860000
tr|A8KBJ5|A8KBJ5_DANRE	Histone H3 OS=Danio rerio OX=7955 GN=zgc:173552 PE=1 SV=1	28	136	R.(KSAPATGGVKKPHRYR)[28.0698]PGTVALREIRRYQKSTELLIRKLPFQRLVREIAQDFKTDLRFQSSAVMALQESSEAYLVGLFEDTNLCAIHAKRVTIMPKDIQLARRIRGERA.	12529	No match		15230000
sp|Q4QRF4|H32_DANRE	Histone H3.2 OS=Danio rerio OX=7955 GN=zgc:113984 PE=2 SV=3	26	136	A.ARKSAPATGGVKKPHRYRPGTVALREIRRYQKSTELLIRKLPFQRLVREIAQDFKTDLRFQSSAV(MALQEASEA)[-171.7838]YLVGLFEDTNLCAIHAKRVTIMPKDIQLARRIRGERA.	12540	No match		10470000
sp|Q6PI20|H33_DANRE	Histone H3.3 OS=Danio rerio OX=7955 GN=h3f3a PE=2 SV=3	27	136	A.RKSAPSTGGVKKPHRYRPGTVALREIRRYQKSTELLIRKLPFQRLVREIAQDFKTDLRFQSAAI(GALQEASEAY)[-24.7390]LVGLFEDTNLCAIHAKRVTIMPKDIQLARRIRGERA.	12556	No match		8111000
sp|Q6PI20|H33_DANRE	Histone H3.3 OS=Danio rerio OX=7955 GN=h3f3a PE=2 SV=3	25	136	K.AARKSAPSTGGVKKPHRYRPGTVALREIRRYQKSTELLIRKLPFQRLVREIAQDFKTDLRFQ(SAA)[-228.0395]IGALQEASEAYLVGLFEDTNLCAIHAKRVTIMPKDIQLARRIRGERA.	12495	No match		10120000
tr|A0A140LG23|A0A140LG23_DANRE	Histone H3 OS=Danio rerio OX=7955 GN=hist2h3ca1 PE=3 SV=1	29	136	K.SAPATGGVKKPHRYRPGTVALREIRRYQKSTEL(LIRKLPFQRLVREIAQDFKTDQRFQSSA)[142.2185]VMALQEASEAYLVGLFEDTNLCAIHAKRVTIMPKDIQLARRIRGERA.	12514	No match		10790000
sp|Q4QRF4|H32_DANRE	Histone H3.2 OS=Danio rerio OX=7955 GN=zgc:113984 PE=2 SV=3	41	136	H.RYRPGTVALREIRRYQKSTELLIRKLPFQRLVREIAQDFKTDLRFQSSAVMALQEASEAYLVGLFEDTNLCAIHAKRVTIMPKDIQLARRIRGERA.	11225.2	No match		12130000
tr|A8KBJ5|A8KBJ5_DANRE	Histone H3 OS=Danio rerio OX=7955 GN=zgc:173552 PE=1 SV=1	41	136	H.RYRPGTVALREIRRYQKSTELLIRKLPFQRLVREIAQDFKTDLRFQSSAVMALQESSEAYLVGLFEDTNLCAIHAKRVTIMPKDIQLARRIRGERA.	11242.2	No match		11950000
tr|Q568Q7|Q568Q7_DANRE	Stathmin OS=Danio rerio OX=7955 GN=stmn1b PE=1 SV=1	2	149	M.(A)[Acetyl]SSGADIQVKELDKRASGQAFEVILSPTAPDAKGEFPLSTPKKKEVSLDEIQKKLDAAEERRKNHEAEVLKHLAEKREHEKEVLQKAMEENNNFSKMAEEKLNQKMEANKENRTARMAAMNEKFKEKDKKLEEVRKNKETKEGGEDEN.	16967.8	No match		86070000
tr|A0A0R4IBX9|A0A0R4IBX9_DANRE	Si:ch73-1a9.3 OS=Danio rerio OX=7955 GN=si:ch73-1a9.3 PE=3 SV=1	38	87	K.KAPAKPKKTKEPKEPKEEEKKEEVPAENGETKADDDASATEDGDKKEDGE.	5478.7	No match		16890000
tr|A0A0R4IWH8|A0A0R4IWH8_DANRE	Heterochromatin protein 1,-binding protein 3 (Fragment) OS=Danio rerio OX=7955 GN=hp1bp3 PE=1 SV=1	7	119	M.PIRRSAAAPPKEEAPPANAPDGDAPAEGSASAGEKENEKNSPSKPENTEDKKAGGDGEEATADGEEQAKDGEAGEGEKSDEAAAEQGKGKKKRGKDAAKLDKEGDDKGKKVKK.K	11546.7	No match		8595000
tr|A0A0R4J7C3|A0A0R4J7C3_DANRE	Microtubule-associated protein OS=Danio rerio OX=7955 GN=map4l PE=1 SV=1	460	504	R.TTRTPPSATSTADTNGTPRPSRITKPPVPKQTPLERKPPVPRAPR.N	4854.7	No match		4207000
tr|X1WH50|X1WH50_DANRE	Si:ch211-137a8.4 OS=Danio rerio OX=7955 GN=si:ch211-137a8.4 PE=1 SV=1	395	435	K.SKKAADTSGVEEEAAGEQEQTDEPQAGKDPGKTAKAKRTHF.N	4326.13	No match		865500
tr|Q3B732|Q3B732_DANRE	High mobility group nucleosomal-binding domain 2 OS=Danio rerio OX=7955 GN=hmgn2 PE=1 SV=1	46	76	K.AAKGKKGSNPAENGDAKADQAQKVDATGDAK.	3041.52	No match		15370000
tr|Q6DGI6|Q6DGI6_DANRE	Thioredoxin OS=Danio rerio OX=7955 GN=txn PE=1 SV=1	2	107	M.VLEIEDKAAFDNALKNAGDKLVVVDFTATWCGPCQT(IGPYFKLLSEKPENKNVVFLKVDVDDAQDVAALCGISCMPTFHFYKNGKKVDEFSGSNQSKLEEKINSHK)[-4.0115].	11731.9	No match		5867000
tr|Q6PBR5|Q6PBR5_DANRE	V-type proton ATPase subunit G OS=Danio rerio OX=7955 GN=atp6v1g1 PE=1 SV=1	2	28	M.(A)[Acetyl]SQSQGIQQLLQAEKRAAEKVAEARKR.K	3035.68	No match		6008000
tr|B8JM34|B8JM34_DANRE	ATP synthase-coupling factor 6, mitochondrial OS=Danio rerio OX=7955 GN=atp5pf PE=1 SV=1	34	109	F.NKAKDMDPIQKLFLDKIRDYNSKSKASGGVVDAGPVYQKNLAEETTKLQRLYGGGDLSKFPQFSFTEPKLDETTTK.	8494.44	No match		319000000
sp|Q9I8P2|PYYA_DANRE	Peptide YY-A OS=Danio rerio OX=7955 GN=pyya PE=2 SV=1	29	63	A.YPPKPENPGDDAA(PEELAKYYTALRHYINLITRQR)[162.0975].Y	4261.2	No match		1754000
tr|Q501T4|Q501T4_DANRE	Family with sequence similarity 241 member A OS=Danio rerio OX=7955 GN=fam241a PE=2 SV=1	2	105	M.(S)[Acetyl]NTNRIVNDAETRHHRDFLTGTRERSGCRHQHERAVKHTHRELNDPRGRDRPHNAEPSQEPAEPEAPQVDDCEKMGTLFGELNKCLRGLGFTQLYFGEKIVEPV.V	12003.8	No match		47870000
sp|Q6PI52|CALM_DANRE	Calmodulin OS=Danio rerio OX=7955 GN=calm1a PE=2 SV=3	2	76	M.(A)[Acetyl]DQLTEEQIAEFKEAFSLFDKDGDGTITTKELGTVMRSLGQNPTEAELQDMINE(VDADGNGTIDFPEFLTMMARK)[45.7664].M	8399.47	No match		5508000
sp|Q6PI52|CALM_DANRE	Calmodulin OS=Danio rerio OX=7955 GN=calm1a PE=2 SV=3	2	149	M.(A)[Acetyl]DQLTEEQIAEFKEAFSLFDKDGDGTITTKELGTVMRSLGQNPTEAELQDMINEVDADGNGTIDFPEFLTMMARKMK(DTDSEEEIREAFRV)[62.0686]FDKDGNGYISAAELRHVMTNLGEKLTDEEVDEMIREADIDGDGQVNYEEFVQMMTAK.	16799.9	No match		25910000
tr|F6NXD5|F6NXD5_DANRE	Myristoylated alanine-rich protein kinase C substrate b OS=Danio rerio OX=7955 GN=marcksb PE=1 SV=1	2	121	M.(GAQISKNGAKDETAAEKPAEAANKSNGQENGH)[213.1746]AKTNGNASPNAEAAAEDVQANGKHAADGEVKAEEGKAEEADAEKAAPEGEGESSAVANGEDSTKTEESAATSSEPAKTKKRFSFKKPF.K	12379	No match		84290000
tr|Q6IMW7|Q6IMW7_DANRE	Parvalbumin 4 OS=Danio rerio OX=7955 GN=pvalb4 PE=1 SV=1	2	109	M.(A)[Acetyl]FAGVLNDADISAALEACKAADSFNHKSFFAKVGLASKSADEVKKAFAIIDQDKSGFIEEEELKLFLQNFKADARALTDGETKTFLKAGDSDGDGKIGIDEFAALVKA.	11484.9	No match		2278000000
tr|Q45QT2|Q45QT2_DANRE	Thymosin beta OS=Danio rerio OX=7955 GN=tmsb4x PE=1 SV=1	2	44	M.(S)[Acetyl]DKPNLEEVTSFDKTKLKKTETQEKNPLPSKETIEQEKQAGS(S)[265.3360].	5153.67	No match		18150000
tr|Q7SX92|Q7SX92_DANRE	Beta-synuclein OS=Danio rerio OX=7955 GN=sncb PE=1 SV=1	1	77	.(M)[Acetyl]DVFMKGLSKAKEGMAVAAEKTKEGVAVAAEKTKEGVMFVGSKTKDSVATVAEKTKEQASQLGGAVMSGAGNIAAAT.G	7773.04	No match		10280000
tr|B3DFP9|B3DFP9_DANRE	Apolipoprotein A-II OS=Danio rerio OX=7955 GN=apoa2 PE=1 SV=1	55	87	A.VEPALEGSPTAGSLKDVVEELKKSPRVESFIKI.A	3551.97	No match		5805000
tr|E9QJP8|E9QJP8_DANRE	Acyl-CoA-binding domain-containing 7 OS=Danio rerio OX=7955 GN=acbd7 PE=1 SV=1	2	51	M.TLKAEFDQYAEDVKKVKTRPTDQELLDLYGLYKQAVVGDINIDKPGMIDL.K	5696	No match		4607000
tr|Q7SY26|Q7SY26_DANRE	Zgc:63587 OS=Danio rerio OX=7955 GN=zgc:63587 PE=1 SV=1	2	29	M.(S)[Acetyl]QTGEKGKFPDAAGYVGFANLPNQVHRK.S	3057.56	No match		3397000
tr|F6NQC4|F6NQC4_DANRE	Neurogranin (protein kinase C substrate, RC3) a OS=Danio rerio OX=7955 GN=nrgna PE=4 SV=1	1	44	.(M)[Acetyl]DCRNEGCSQPQDEDIMDIPLDDPAANKAAAKIQAGFRGHMTRK.K	4884.27	No match		1220000
tr|Q5XJ75|Q5XJ75_DANRE	Sulfatase-modifying factor 2 OS=Danio rerio OX=7955 GN=sumf2 PE=1 SV=1	30	75	F.IPGGKMLMGTSAADGRDGESPTRAVALQPFKIDKYPVTNSNFREFV.R	4967.48	No match		60540000
tr|F8W5Y7|F8W5Y7_DANRE	SEC61 translocon subunit beta OS=Danio rerio OX=7955 GN=sec61b PE=1 SV=1	2	33	M.PGPAASATNVGASSRSPSKTVAPRTAGTSARQ.R	3037.58	No match		9961000
tr|Q6PC77|Q6PC77_DANRE	ATP synthase subunit d, mitochondrial OS=Danio rerio OX=7955 GN=atp5pd PE=1 SV=1	126	161	M.(IPF)[-5.9492]DQMTIEDLNNTFPETKLDKQKYPYWPYKPVADL.	4351.26	No match		542600
tr|A0A0R4ILK7|A0A0R4ILK7_DANRE	Si:ch73-119p20.1 OS=Danio rerio OX=7955 GN=si:ch73-119p20.1 PE=4 SV=1	21	91	A.(APPPAKPDPVPAEPTEPEKPAEDGSTNQQGAAESAGSCCETLESLKPFLI)[-17.1853]GGAVIALGAVLVGVILLAKKN.	7040.27	No match		1290000
tr|A0A2R8RYQ3|A0A2R8RYQ3_DANRE	Calmodulin OS=Danio rerio OX=7955 GN=calm2a PE=3 SV=1	39	82	R.SLGQNPTEAELQDMINEVDMIREADI(DGDGQVN)[271.4507]YEEFVQMMTAK.	5244.79	No match		3130000
tr|A0A0R4ILK7|A0A0R4ILK7_DANRE	Si:ch73-119p20.1 OS=Danio rerio OX=7955 GN=si:ch73-119p20.1 PE=4 SV=1	1	40	.(M)[Acetyl]EAKAKGAPKSASKAEKKEAAPPPAKPDPVPAE(PTEPEKP)[425.3803].A	4571.41	No match		801300
tr|Q7SZP4|Q7SZP4_DANRE	Zgc:65851 OS=Danio rerio OX=7955 GN=zgc:65851 PE=1 SV=1	2	24	M.(S)[Acetyl]YSGDIYTSSSYRKIFGDAPRRV.P	2666.32	No match		1076000
tr|A0A0G2KNY9|A0A0G2KNY9_DANRE	Peptidyl-prolyl cis-trans isomerase OS=Danio rerio OX=7955 GN=pin1 PE=1 SV=1	118	141	F.ALKVGDMSGPVFTDSGVHIILRTG.	2470.32	No match		49260
sp|Q9I8V0|PRV2_DANRE	Parvalbumin-2 OS=Danio rerio OX=7955 GN=pvalb2 PE=3 SV=3	2	109	M.(A)[Acetyl]FAGILKDEDVAAALKDCAAADSFNYKNFFAKVGLSAKSPDDIKKAFFVIDQDKSGFIEEDELKLFLQNFSAGARALTDAETKAFLSAGDSDGDGKIGVDEFALLVKA.	11526.9	No match		618800000
tr|E7F290|E7F290_DANRE	Si:ch211-222l21.1 OS=Danio rerio OX=7955 GN=si:ch211-222l21.1 PE=1 SV=1	2	123	M.(A)[Acetyl]DTAVDTTTTSEITAKDLKEKKEVVEEAAEAAKENGSEDAPANGNGTTNGASHEEEEAHEDEEGGEDEEAGEAEEEENGAEEEAAAEEHPVKRPAEEEEAVETKKQKTEENGDSTEAAEVKA.	12947.8	No match		37260000
tr|Q7SX92|Q7SX92_DANRE	Beta-synuclein OS=Danio rerio OX=7955 GN=sncb PE=1 SV=1	1	127	.(M)[Acetyl]DVFMKGLSKAKEGMAVAAEKTKEGVAVAAEKTKEGVMFVGSKTKDSVATVAEKTKEQASQLGGAVMSGAGNIAAATGLVKKDEFPSDMNPEFGQEATEEPGEGLMDPEGQTYDDNQQESQDYEPEA.	13374.4	No match		1623000000
sp|Q6PD99|MRPA_DANRE	MARCKS-related protein 1-A OS=Danio rerio OX=7955 GN=marcksl1a PE=2 SV=1	96	213	F.SLKNSFKFKGISLKKNKKASEEAAEAVATPTTAEDKPEENGQAATETKEEEPAAETNETPAPEAEAEPKVEEAEPKAEEPAQQTETAPTEETTKSEESPAPVEETTPTESSDPEPAAE.	12534	No match		35530000
sp|Q6NV32|PTMAA_DANRE	Prothymosin alpha-A OS=Danio rerio OX=7955 GN=ptmaa PE=2 SV=1	1	105	.(M)[Acetyl]ADTKVDTSKEVSAKDLKEKKQVEEAENGKDAPANGNAEN(EENGDQENEVDEEDDDV)[-160.6448]AEEDEEDDGEGDDDDEDEEAEGGTGKRAAEDDDDDEDDVDPKKQKTDV.	11367.8	No match		177000000
tr|F8W3R0|F8W3R0_DANRE	Myelin basic protein OS=Danio rerio OX=7955 GN=mbpb PE=1 SV=1	2	30	M.(A)[Acetyl]SASSSQ(STFRLGRTKKN)[0.9958]PTVMDQIGKFF.G	3231.66	No match		7087000
tr|A0A2R8RP85|A0A2R8RP85_DANRE	Synuclein, gamma b (breast cancer-specific protein 1) OS=Danio rerio OX=7955 GN=sncgb PE=1 SV=1	1	113	.(M)[Acetyl]DVLMKGFSMAKEGVVAAAEKTKAGVEEAALKTKEGVMYVGNKTKEGMVSGVNTVVQKTTDQANIVGETAVG(GANVAGQNTVEGLENV)[17.4057]AASTGMVNPGDFSHGGMEGGEGGEG.Y	11330.5	No match		45130000
tr|A0A2R8RP85|A0A2R8RP85_DANRE	Synuclein, gamma b (breast cancer-specific protein 1) OS=Danio rerio OX=7955 GN=sncgb PE=1 SV=1	1	114	.(M)[Acetyl]DVLMKGFSMAKEGVVAAAEKTKAGVEEAALKTKEGVMYVGNKTKEGMVSGVNTVVQKTTDQANIVGETAVGGANVAGQNTVEGLENV(A)[19.3502]ASTGMVNPGDFSHGGMEGGEGGEGY.	11495.6	No match		268000000
tr|A0A2R8RP85|A0A2R8RP85_DANRE	Synuclein, gamma b (breast cancer-specific protein 1) OS=Danio rerio OX=7955 GN=sncgb PE=1 SV=1	1	113	.(M)[Acetyl]DVLMKGFSMAKEGVVAAAEKTKAGVEEAALKTKEGVMYVGNKTKEGMVSGVNTVVQKTTDQANIVGETAVGGANVAGQNTVEGLENVAASTGMVNPGDFSHGGMEGGEGGEG.Y	11313.5	No match		225200000
tr|A0A2R8RP85|A0A2R8RP85_DANRE	Synuclein, gamma b (breast cancer-specific protein 1) OS=Danio rerio OX=7955 GN=sncgb PE=1 SV=1	1	114	.(M)[Acetyl]DVLMKGFSMAKEGVVAAAEKTKAGVEEAALKTKEGVMYVGNKTKEGMVSGVNTVVQKTTDQANIVGETAVGGANVAGQNTVEGLE(NV)[4.3885]AASTGMVNPGDFSHGGMEGGEGGEGY.	11480.6	No match		623900
tr|Q6PBJ9|Q6PBJ9_DANRE	60S acidic ribosomal protein P2 OS=Danio rerio OX=7955 GN=rplp2 PE=1 SV=1	1	115	.MRYVAAYLLAVLGGNTNPSAKDIKNILGSVGIEADDERLNKVVSELNGKDINEVMNAGLSKLASVPAGGAVAVS(TASAGGGGGAPAEAPAAEEKKEEKKEESEESDEDMGFGLFD)[159.1509].	11863.8	No match		33070000
sp|Q6PI52|CALM_DANRE	Calmodulin OS=Danio rerio OX=7955 GN=calm1a PE=2 SV=3	2	149	M.(A)[Acetyl]DQLTEEQIAEFKEAFSLFDKDGDGTITTKELGTVMRSLGQNPTEAELQDMINE(VDADGNGTIDFPEFLTMMARKMKDTDSEEEIREAFRVFDKDGNGYISAAELRHVMTNLGEKLTDEEVDEMIREADIDGDGQV)[43.6870]NYEEFVQMMTAK.	16781	No match		105600000
tr|F1Q734|F1Q734_DANRE	Lysophosphatidic acid receptor 2b OS=Danio rerio OX=7955 GN=lpar2b PE=3 SV=1	2	101	M.VCYNNETVVFFYSISHKNISDTWGTKAKAVVGMGLLVSVFVIFTNILVMAAIFMNRRFHYPIYYLLGNLAAADLFAGTSYMYLMFHTGPWTAKLTTYQWF.V	11477.6	No match		1135000000
tr|A2BF67|A2BF67_DANRE	Endosulfine alpha b OS=Danio rerio OX=7955 GN=ensab PE=3 SV=1	2	44	M.(S)[Acetyl]SDNQDTETHPEQVDETQESQDTNSNPVRTEEAKLKAKYPNLG.Q	4871.25	No match		1785000
tr|Q7T3A5|Q7T3A5_DANRE	Ubiquitin-like 7 OS=Danio rerio OX=7955 GN=ubl7b PE=1 SV=1	232	268	D.FQSASRGGSSWPLRASGSRPGTLAHSGAMGPRPITQS.E	3750.92	No match		1286000
tr|E9QEC3|E9QEC3_DANRE	Coiled-coil-helix-coiled-coil-helix domain-containing 10 OS=Danio rerio OX=7955 GN=chchd10 PE=1 SV=1	2	49	M.ARGSRSRPSPAPASAPAPSYAPAPAAPPPMAVAPAAAQPKQPGLMAQM.A	4642.39	No match		138000
tr|A0A2R8PY84|A0A2R8PY84_DANRE	Purkinje cell protein 4 OS=Danio rerio OX=7955 PE=4 SV=1	1	48	.MSQR(QGSGAAGGNSKTSGAQDASKKDV)[-88.0367]PEDFDIDMDAPETEKAAVAIQ.S	4820.27	No match		10660000
sp|A1L224|CR3L2_DANRE	Cyclic AMP-responsive element-binding protein 3-like protein 2 OS=Danio rerio OX=7955 GN=creb3l2 PE=2 SV=1	137	167	P.ALTLTVTPAGSAPEPVIDSCDSAQSLSLPQV.K	3065.55	No match	139400
tr|E9QEC3|E9QEC3_DANRE	Coiled-coil-helix-coiled-coil-helix domain-containing 10 OS=Danio rerio OX=7955 GN=chchd10 PE=1 SV=1	2	49	M.ARGSRSRPSPAPASAPAPSYAPAPAAPPPMAVAPAAAQPKQPGLMAQM.A	4644.4	No match	259000
tr|Q6IQI7|Q6IQI7_DANRE	Heat shock 10 protein 1 OS=Danio rerio OX=7955 GN=hspe1 PE=1 SV=1	1	99	.(M)[Acetyl]QAFRKFLPMFDRVLVERLAAETV(SRGGIMIPEKSQAKVLQATV)[-35.4986]VAVGPGSTNKDGKVIPVCVKVGDKVLLPEYGGTKVMLEDKDYFLFRDADILGKYV.D	10904	No match	471300
tr|Q3B732|Q3B732_DANRE	High mobility group nucleosomal-binding domain 2 OS=Danio rerio OX=7955 GN=hmgn2 PE=1 SV=1	2	25	M.PKRKIDGEKGAKGKEEPTRRSARL.S	2706.56	No match	760000
tr|E7FD23|E7FD23_DANRE	Si:dkey-276j7.1 OS=Danio rerio OX=7955 GN=si:dkey-276j7.1 PE=1 SV=1	18	56	A.QNASSNGAVGPSSQIPGLSATAETTPEERTKGRRVGIQA.S	3921.99	No match	837100
tr|A4VAK4|A4VAK4_DANRE	Heat shock 27 kDa protein OS=Danio rerio OX=7955 GN=hspb1 PE=1 SV=1	175	193	A.PLPKPAIQAPEVNIPVNKT.T	2025.18	No match	893600
tr|Q7SZZ5|Q7SZZ5_DANRE	Vesicle-associated membrane protein 2 OS=Danio rerio OX=7955 GN=vamp2 PE=1 SV=1	2	69	M.(S)[Acetyl]APAGAPAPEGGNQAPPNLTSNRRLQQTQAQVDEVVDIMRVNVDKVLERDQKLSELDDRADALQAGAS.Q	7261.69	No match	1363000
tr|F1QB70|F1QB70_DANRE	Cyclic nucleotide-gated potassium channel (Fragment) OS=Danio rerio OX=7955 GN=cngk PE=4 SV=1	1	94	.ALCVSFVEIYGVMSWIAEIEISDFSEMYKYAVYWIVQIYTTVGFGDILSLNLGEVMACTFIMILSKIQVIYKMGLLIATQTNKNTLQVAFEAKL.Q	10641.5	No match	1436000
tr|I3ITP3|I3ITP3_DANRE	Myelin basic protein OS=Danio rerio OX=7955 GN=mbpa PE=1 SV=1	2	31	M.(A)[Acetyl]TASTS(GQNPFGLGRKKKAPGVLDQI)[0.9983]SRFF.G	3220.71	No match	1474000
tr|Q801G3|Q801G3_DANRE	Membrane progestin receptor beta OS=Danio rerio OX=7955 GN=paqr8 PE=2 SV=1	2	35	M.SSGVLGRLSTLTLSLQQLGQLP(HLSNWLPRLP)[-85.0429]RR.Q	3708.15	No match	1624000
sp|Q1RM09|BASP1_DANRE	Brain acid soluble protein 1 homolog OS=Danio rerio OX=7955 GN=basp1 PE=2 SV=2	153	197	A.ASESKPDAESKKTEAPPTKESAPAEPITTETSPAPNKEQAVAVQD.	4661.31	No match	1677000
tr|Q6PBJ8|Q6PBJ8_DANRE	Peptidylprolyl isomerase OS=Danio rerio OX=7955 GN=fkbp1aa PE=1 SV=1	72	108	Q.RAKLTC(TPDFAYGSKGHPGVI)[77.9458]PPNATLIFDVELIGLE.	4017.02	No match	1678000
sp|Q6NWH2|MRPB_DANRE	MARCKS-related protein 1-B OS=Danio rerio OX=7955 GN=marcksl1b PE=2 SV=1	179	207	A.KEEAAAPAVEATKQTEETNSTPAPSEQKE.	3070.48	No match	2023000
tr|A0A2R8QN30|A0A2R8QN30_DANRE	Myelin protein zero OS=Danio rerio OX=7955 GN=mpz PE=1 SV=1	188	228	H.GKKGKGKEGSQQKQASAVTDPAKLKAAASEKKKQESRREKK.	4423.51	No match	2163000
tr|Q6PBR5|Q6PBR5_DANRE	V-type proton ATPase subunit G OS=Danio rerio OX=7955 GN=atp6v1g1 PE=1 SV=1	2	30	M.(A)[Acetyl]SQSQGIQQLLQAEKRAAEKVAE(ARKRKN)[-17.9991].R	3259.81	No match	2180000
tr|F6NQC4|F6NQC4_DANRE	Neurogranin (protein kinase C substrate, RC3) a OS=Danio rerio OX=7955 GN=nrgna PE=4 SV=1	42	60	M.TRKKMKDDKPREEKQREPK.	2426.34	No match	2468000
sp|Q6PC91|BT3L4_DANRE	Transcription factor BTF3 homolog 4 OS=Danio rerio OX=7955 GN=btf3l4 PE=2 SV=1	1	22	.(M)[Acetyl]NQEKLAKLQAQVRIGGKGTAR.R	2438.37	No match	2495000
sp|Q8JFV8|VAT1_DANRE	Synaptic vesicle membrane protein VAT-1 homolog OS=Danio rerio OX=7955 GN=vat1 PE=2 SV=1	409	484	T.TEPMKEEEKKEEAKKDEEKKDDKKKDDKKKDDKKKEDKKKDEAKKEEKKDEKKKEEAKKDDKKAEEKKEEVKKEEN.	9289.94	No match	2505000
tr|Q7ZUQ9|Q7ZUQ9_DANRE	Cirbp protein OS=Danio rerio OX=7955 GN=cirbpb PE=1 SV=1	2	53	M.(S)[Acetyl]DEGKLFIGGLSYDTTEQSLEEAFSKYGTIAKVDVIRDRETDRSRGFGFVTF.E	5878.94	No match	2712000
tr|E7EXD7|E7EXD7_DANRE	Histone H2A OS=Danio rerio OX=7955 GN=si:ch211-113a14.19 PE=3 SV=1	105	128	A.QGGVLPNIQAVLLPKKTEKAAKGK.	2487.51	No match	2770000
tr|Q6P5L5|Q6P5L5_DANRE	NADH dehydrogenase [ubiquinone] 1 beta subcomplex subunit 8, mitochondrial OS=Danio rerio OX=7955 GN=ndufb8 PE=1 SV=1	142	188	L.TMFMFGMGEVLPSYQPVAAKQYPYNNLYLERGGDPEKEPEPVKNYEI.	5438.62	No match	2836000
sp|Q6PI52|CALM_DANRE	Calmodulin OS=Danio rerio OX=7955 GN=calm1a PE=2 SV=3	2	55	M.(A)[Acetyl]DQLTEEQIAEFKEAFSLFDKDGDGTITTKELGTVMRSLGQNPTEAELQDMI(NE)[-44.2709].V	6000.42	No match	2854000
tr|F6NQC4|F6NQC4_DANRE	Neurogranin (protein kinase C substrate, RC3) a OS=Danio rerio OX=7955 GN=nrgna PE=4 SV=1	1	42	.(MDCRNEGC)[40.0004]SQPQDEDIMDIPLDDPAANKAAAKIQAGFRGHMT.R	4599.04	No match	2985000
tr|B8JM34|B8JM34_DANRE	ATP synthase-coupling factor 6, mitochondrial OS=Danio rerio OX=7955 GN=atp5pf PE=1 SV=1	86	109	Y.GGGDLSKFPQFSFTEPKLDETTTK.	2629.31	No match	2996000
tr|E7FD23|E7FD23_DANRE	Si:dkey-276j7.1 OS=Danio rerio OX=7955 GN=si:dkey-276j7.1 PE=1 SV=1	2	36	M.(A)[Acetyl]AEPNYRRTKPGVKQAQNASSNGAVGPSSQIPGLS.A	3579.82	No match	3160000
tr|Q7SZP4|Q7SZP4_DANRE	Zgc:65851 OS=Danio rerio OX=7955 GN=zgc:65851 PE=1 SV=1	2	27	M.(S)[Acetyl]YSGDIYTSSSYRKIFGDAPRRVPVG.S	2919.47	No match	3295000
tr|A0A2R8RPC7|A0A2R8RPC7_DANRE	NADH dehydrogenase [ubiquinone] 1 alpha subcomplex subunit 8 OS=Danio rerio OX=7955 GN=ndufa8 PE=1 SV=1	131	171	V.QTARPLPENPYHSRPRPEPNTPIEAELQPAKHGSRLFFWNW.	4862.48	No match	3320000
tr|Q6ZM17|Q6ZM17_DANRE	Novel protein similar to zebrafish hemoglobin alpha-adult 1 (Hbaa1) OS=Danio rerio OX=7955 GN=si:ch211-5k11.8 PE=1 SV=1	2	34	M.(S)[Acetyl]LSDKDKAVVKAIWAKISPKADEIGAEALARML.T	3565.97	No match	3461000
tr|A0A2R8QN30|A0A2R8QN30_DANRE	Myelin protein zero OS=Danio rerio OX=7955 GN=mpz PE=1 SV=1	193	228	K.GKEGSQQKQASAVTDPAKLKAAASEKKKQESRREKK.	3925.17	No match	4057000
tr|Q4VBU7|Q4VBU7_DANRE	Cytochrome c oxidase polypeptide Va OS=Danio rerio OX=7955 GN=cox5aa PE=1 SV=1	103	141	A.VKDKAGPHKEIYPYVIQELRPTLDELGIATPEELGIDKA.	4345.34	No match	4070000
tr|F8W3R0|F8W3R0_DANRE	Myelin basic protein OS=Danio rerio OX=7955 GN=mbpb PE=1 SV=1	16	37	R.TKKNPTVMDQIGKFFGGEKKKK.G	2508.4	No match	4184000
tr|A0A0R4IPR0|A0A0R4IPR0_DANRE	Tyrosine-protein phosphatase non-receptor type 13 OS=Danio rerio OX=7955 GN=ptpn13 PE=1 SV=1	977	1024	S.DTGSIAVARQQESLSVDDSPRWSPKSLKKESDSSSCEDTGQAYVVGVS.M	5086.44	No match	4458000
sp|Q1LYB6|ATF1B_DANRE	ATPase inhibitor B, mitochondrial OS=Danio rerio OX=7955 GN=atp5if1b PE=3 SV=1	44	107	Q.AGGAFGKKQAAEEEMYFKRKEQEQLSALRRHHQEEIDHHKKEIERLQHEITRHESKIKKLKHDD.	7737.06	No match	4695000
tr|F8W3W8|F8W3W8_DANRE	Myelin basic protein OS=Danio rerio OX=7955 GN=mbpa PE=1 SV=1	17	95	R.KKKAPGVLDQISRFFGGDKKRKGKRPHHSSTRRRGDVNPVVHFFRSFVSSPRPKSRWRELLGLGESRSRSPPKRWSTIF.	9193.11	No match	5171000
sp|Q8JFV8|VAT1_DANRE	Synaptic vesicle membrane protein VAT-1 homolog OS=Danio rerio OX=7955 GN=vat1 PE=2 SV=1	2	50	M.SGEDAPAQQQNAEEQKQQETKTPAESPKTESKPDPPPTSASTEAAATAA.A	5034.39	No match	5684000
tr|Q6NYV3|Q6NYV3_DANRE	H1.0 linker histone OS=Danio rerio OX=7955 GN=h1-0 PE=1 SV=1	17	51	K.SSKKGTSHPKYSEMIKAAIAADRSRGGASRQSIQK.Y	3731	No match	6066000
tr|Q6PBR5|Q6PBR5_DANRE	V-type proton ATPase subunit G OS=Danio rerio OX=7955 GN=atp6v1g1 PE=1 SV=1	31	60	N.RRLKQAKEEAQAEIEQYRLQREKEFKTKEA.A	3733.03	No match	7673000
tr|Q6PBJ8|Q6PBJ8_DANRE	Peptidylprolyl isomerase OS=Danio rerio OX=7955 GN=fkbp1aa PE=1 SV=1	2	32	M.GVEVETIT(PGDGSTFPKKGQTCVVHYVGSLT)[3.9159].D	3209.52	No match	7924000
tr|A0A0N4STS4|A0A0N4STS4_DANRE	Ubiquitin B OS=Danio rerio OX=7955 GN=ubb PE=4 SV=1	1	74	.MQIFVKTLTGKTITLEVEPSDTIENVKAKIQDKEGIPPDQQRLIFAGKQLEDGRTLSDYNIQKESTLHLVLRLR.G	8446.64	No match	8802000
sp|Q7ZUY3|H2AX_DANRE	Histone H2AX OS=Danio rerio OX=7955 GN=h2ax PE=2 SV=3	83	119	R.HLQLAVRNDEELNKLLGGVTIAQGGVLPNIQAVLLPK.K	3930.27	No match	8994000
tr|Q3B732|Q3B732_DANRE	High mobility group nucleosomal-binding domain 2 OS=Danio rerio OX=7955 GN=hmgn2 PE=1 SV=1	29	76	K.(PAPPKPEPKAKKAAPKKAAKGKKGSN)[50.2326]PAENGDAKADQAQKVDATGDAK.	4854.68	No match	9276000
sp|Q7ZUY3|H2AX_DANRE	Histone H2AX OS=Danio rerio OX=7955 GN=h2ax PE=2 SV=3	67	103	L.AGNAARDNKKTRIIPRHLQLAVRNDEELNKLLGGVTI.A	4093.32	No match	9311000
sp|Q6NV32|PTMAA_DANRE	Prothymosin alpha-A OS=Danio rerio OX=7955 GN=ptmaa PE=2 SV=1	2	105	M.(A)[Acetyl]DTKVDTSKEVSAKDLKEKKQVEEAENGKDAPANGNAENEENGDQENEVDEEDDDVAEEDEEDDGEGDDDDEDEEAEGGTGKRAAEDDDDDEDDVDPKKQKTDV.	11397.8	No match	9320000
sp|Q6DI06|TIM10_DANRE	Mitochondrial import inner membrane translocase subunit Tim10 OS=Danio rerio OX=7955 GN=timm10 PE=3 SV=1	1	88	.(M)[Acetyl]DPMKAQQLAAELEVEMMAD(MYNRMTNACHRKCVPPHYKEAELSKGEAVCLDRCVAKYLD)[-4.0042]LHERLGRKLTELSVQDEEVMRKAAAGTG.	9986.86	No match	9451000
tr|A0A2R8RP85|A0A2R8RP85_DANRE	Synuclein, gamma b (breast cancer-specific protein 1) OS=Danio rerio OX=7955 GN=sncgb PE=1 SV=1	1	114	.(M)[Acetyl]DVLMKGFSMAKEGVVAAAEKTKAGVEEAALKTKEGVMYVGNKTKEGMVSGVNTVVQKTTDQANIVGETAVGGANVAGQNTVE(GLENV)[75.4434]AASTGMVNPGDFSHGGMEGGEGGEGY.	11551.6	No match	9731000
tr|A0A0N4STS4|A0A0N4STS4_DANRE	Ubiquitin B OS=Danio rerio OX=7955 GN=ubb PE=4 SV=1	1	76	.(MQIFVKTLT)[312.1480]GKTITLEVEPSDTIENVKAKIQDKEGIPPDQQRLIFAGKQLEDGRTLSDYNIQKESTLHLVLRLRGG.M	8871.83	No match	10660000
tr|F1R6L3|F1R6L3_DANRE	Cold-inducible RNA-binding protein b (Fragment) OS=Danio rerio OX=7955 GN=cirbpb PE=1 SV=1	188	224	R.SGGYSSGGGYRDNRNQGGYDRSGGSYRDGYDSYASHE.	3953.65	No match	10810000
tr|Q3B732|Q3B732_DANRE	High mobility group nucleosomal-binding domain 2 OS=Danio rerio OX=7955 GN=hmgn2 PE=1 SV=1	38	76	K.AKKAAPKKAAK(GKKGSN)[0.9988]PAENGDAKADQAQKVDATGDAK.	3864.07	No match	11070000
tr|Q7ZUQ9|Q7ZUQ9_DANRE	Cirbp protein OS=Danio rerio OX=7955 GN=cirbpb PE=1 SV=1	2	71	M.(S)[Acetyl]DEGKLFIGGLSYDTTEQSLEEAFSKYGTIAKVDVIRDRETDRSRGFGFVTFENPEDAKDAMAAMNGKQV.D	7778.78	No match	11800000
tr|Q7SXM1|Q7SXM1_DANRE	Cytochrome c oxidase subunit OS=Danio rerio OX=7955 GN=cox6b2 PE=1 SV=1	13	86	Y.RTAPFDARFPNTNQTRNCYQNYLDFHRCNKALSSKGQ(DTSPCEWYQRVYKSLCPISWVGK)[-4.0174]WDSQIEDGSFPGKI.	8643.13	No match	12720000
tr|X1WER9|X1WER9_DANRE	Cytochrome c oxidase subunit 8B OS=Danio rerio OX=7955 GN=cox8b PE=3 SV=1	25	73	N.ITAKPAKHALSAGEQVIALSVMFVT(I)[16.0023]LGPSGWILSHLEDYKHRPGAAQE.	5252.81	No match	12950000
tr|F1QGG8|F1QGG8_DANRE	Si:ch73-343l4.1 (Fragment) OS=Danio rerio OX=7955 GN=si:ch73-343l4.1 PE=4 SV=8	1	70	.AWFFMSTEAMSWSESRQFCRNHGADLVIIKSEEKQRFISSFVKERVWIGLSDIQTEGTMKWVDNSILNNQ.	8241.02	No match	13250000
tr|A0A140LG80|A0A140LG80_DANRE	Ankyrin repeat and SOCS box-containing 5a (Fragment) OS=Danio rerio OX=7955 GN=asb5a PE=4 SV=1	1	50	.MKGGHDDDDDVWNASAVILDIDSGSWADRSALHD(AASQGRLLALKTL)[-497.3629]IAQ.	4820.27	No match	13740000
tr|Q6P0T7|Q6P0T7_DANRE	Tnnt3b protein OS=Danio rerio OX=7955 GN=tnnt3b PE=1 SV=1	2	74	M.(S)[Acetyl]DTEDVGVEEEKPKFKPSAPKIPDGDKVDFDDIQKKRQNKDLVELQALIDAHFEHRKKEEEELIALKDRIEKR.R	8592.52	No match	14170000
tr|A0A1D5NSI6|A0A1D5NSI6_DANRE	Troponin T type 3b (skeletal, fast) OS=Danio rerio OX=7955 GN=tnnt3b PE=1 SV=1	169	227	R.RKPLNIDHMNEDKLREKAKELWDWLYSLEAEKFEHMEKLKRQKYEVTTQRKRVEELSKY.S	7461.93	No match	15710000
tr|F8W4C1|F8W4C1_DANRE	Myelin basic protein OS=Danio rerio OX=7955 GN=mbpb PE=1 SV=1	2	30	M.(A)[Acetyl]SASS(S)[0.9978]QSTFRLGRTKKNPTVMDQIGKFF.G	3231.66	No match	17640000
tr|F8W3V8|F8W3V8_DANRE	Myelin basic protein OS=Danio rerio OX=7955 GN=mbpa PE=1 SV=1	17	107	R.KKKAPGVLDQISRFFGGDKKRKGKGSFRGHLSSSPQRPHHSSTRRRGDVNPVVHFFRSFVSSPRPKSRWRELLGLGESRSRSPPKRWSTIF.	10433.7	No match	17840000
tr|Q45QT2|Q45QT2_DANRE	Thymosin beta OS=Danio rerio OX=7955 GN=tmsb4x PE=1 SV=1	2	44	M.(S)[Acetyl]DKPNLEEVTSFDKTKLKKTETQEKNPLPSKETIEQEKQA(GSS)[-174.0551].	4714.44	No match	18060000
tr|Q3B732|Q3B732_DANRE	High mobility group nucleosomal-binding domain 2 OS=Danio rerio OX=7955 GN=hmgn2 PE=1 SV=1	40	76	K.KAAPKKAAKGKKGSNPAENGDAKADQAQKVDATGDAK.	3664.95	No match	21490000
tr|Q6PBR5|Q6PBR5_DANRE	V-type proton ATPase subunit G OS=Danio rerio OX=7955 GN=atp6v1g1 PE=1 SV=1	1	28	.(MA)[-83.0797]SQSQGIQQLLQAEKRAAEKVAEARKR.K	3041.52	No match	22060000
tr|Q6NYV3|Q6NYV3_DANRE	H1.0 linker histone OS=Danio rerio OX=7955 GN=h1-0 PE=1 SV=1	17	52	K.SSKKGTSHPKYSEMIKAAIAADRSRGGASRQSIQKY.V	3894.06	No match	23220000
tr|B3DFP9|B3DFP9_DANRE	Apolipoprotein A-II OS=Danio rerio OX=7955 GN=apoa2 PE=1 SV=1	88	141	I.AGGLASELEPVVDKARLNALGVYGHYFRPYVGAYLDSAINNVKPVLDTVLPQGN.	5740.04	No match	23720000
tr|F1Q9A4|F1Q9A4_DANRE	Cytochrome c oxidase subunit 7A2a OS=Danio rerio OX=7955 GN=cox7a2a PE=1 SV=1	24	83	Q.LENKVPNKQKLFQEDNDLPVHLKGGLTDGLLYRLTMALTIFGSGYV(V)[16.0034]YTLFDAAMPKKKD.	6768.63	No match	24360000
tr|A1A5Y7|A1A5Y7_DANRE	High mobility group nucleosomal-binding domain 7 OS=Danio rerio OX=7955 GN=hmgn7 PE=1 SV=1	2	95	M.PKRKGTDGEVKEEPQRRSARLSAKPTPPKPEPKPKKTPKKDKEVNDKKEDKKAKGKADESKEENQSENGETKTNEVEKTADEAAEGEKDDPKTE.	10505.4	No match	24450000
tr|A0A286Y9F3|A0A286Y9F3_DANRE	Otospiralin OS=Danio rerio OX=7955 GN=otos PE=4 SV=1	23	90	A.RVIPEGVPYENPPAVPYWSYSTSDFWNYVEYFRSIGAYDQINQLARTFFAHQHLGDTLGYEVAEQHEH.	8002.81	No match	27290000
tr|Q5I2C7|Q5I2C7_DANRE	Myelin basic protein OS=Danio rerio OX=7955 GN=mbpa PE=1 SV=1	2	88	M.(A)[Acetyl](TAST)[-246.0899]SGQNPFGLGRKKKAPGVLDQISRFFGGDKKRKGKRPHHSSTRRRGDVNPVVHFFRSFVSSPRPKSRGESRSRSPPKRWSTIF.	9567.21	No match	28620000
tr|A7YY99|A7YY99_DANRE	ATP synthase subunit e, mitochondrial OS=Danio rerio OX=7955 GN=atp5mea PE=1 SV=1	2	71	M.VPPVQVSPLIKTARWSALLIGLIYGKQRYDYLKPIAAEERRIEEEEKKLREEQERIYKQLSEANSDTILK.	8236.55	No match	28730000
tr|B8JM34|B8JM34_DANRE	ATP synthase-coupling factor 6, mitochondrial OS=Danio rerio OX=7955 GN=atp5pf PE=1 SV=1	35	109	N.KAKDMDPIQKLFLDKIRDYNSKSKASGGVVDAGPVYQKNLAEETTKLQRLYGGGDLSKFPQFSFTEPKLDETTTK.	8380.39	No match	29250000
tr|Q4V8S5|Q4V8S5_DANRE	Acbd7 protein OS=Danio rerio OX=7955 GN=acbd7 PE=1 SV=1	2	88	M.(T)[Acetyl]LKAEFDQYAEDVKKVKTRPTDQELLDLYGLYKQAVVGDINIDKPGMIDLKGKAKWDAWDSRKGMSTEDAMKAYITLAKQAIEKYGK.	9923.17	No match	30920000
tr|A0A2R8QNU1|A0A2R8QNU1_DANRE	High mobility group nucleosome-binding domain 6 OS=Danio rerio OX=7955 GN=hmgn6 PE=1 SV=1	26	84	K.SKKTAKKDKAVKKEDKKTKVKAKETSESAANEENHSENGDAKTNAVAKTNKEAKEAKSE.	6415.39	No match	32450000
tr|E7EXD7|E7EXD7_DANRE	Histone H2A OS=Danio rerio OX=7955 GN=si:ch211-113a14.19 PE=3 SV=1	83	128	R.HLQLAVRNDEELNKLLGGVTIAQGGVLPNIQAVLLPKKTEKAAKGK.	4871.83	No match	33760000
sp|Q6NWH2|MRPB_DANRE	MARCKS-related protein 1-B OS=Danio rerio OX=7955 GN=marcksl1b PE=2 SV=1	113	207	K.KSKKNAEVKEEAAAAAPATEEKPEENGAATEEKKEEEAKAEETPAAPVETPKAEEPAAKAEEPAAAKEEAAAPAVEATKQTEETNSTPAPSEQKE.	9877.82	No match	37200000
sp|Q6NWH2|MRPB_DANRE	MARCKS-related protein 1-B OS=Danio rerio OX=7955 GN=marcksl1b PE=2 SV=1	114	207	K.SKKNAEVKEEAAAAAPATEEKPEENGAATEEKKEEEAKAEETPAAPVETPKAEEPAAKAEEPAAAKEEAAAPAVEATKQTEETNSTPAPSEQKE.	9749.74	No match	38170000
tr|A0A0N4STS4|A0A0N4STS4_DANRE	Ubiquitin B OS=Danio rerio OX=7955 GN=ubb PE=4 SV=1	1	76	.(MQIFV)[266.1277]KTLTGKTITLEVEPSDTIENVKAKIQDKEGIPPDQQRLIFAGKQLEDGRTLSDYNIQKESTLHLVLRLRGG.M	8825.82	No match	38850000
tr|Q7ZUI4|Q7ZUI4_DANRE	Thioredoxin OS=Danio rerio OX=7955 GN=zgc:56493 PE=1 SV=1	1	108	.MIVVIEDQDGFDKAL(AGAGDKLVVVDF)[-4.0164]TATWCGPCQSIAPFYKGLSENPDYSNVVFLKVDVDDAQDVAQSCEIKCMPTFHFYKNGKKLDDFSGSNQTKLEEMVKQHKN.	12002.8	No match	41810000
tr|Q6DHG4|Q6DHG4_DANRE	Complexin 2 OS=Danio rerio OX=7955 GN=cplx2l PE=2 SV=1	1	133	.(M)[Acetyl]NFLLKAAMGGGPPDVGKMLGGEEDKDPEAEKEKEEERQEALRQEEEERKAKHAKMEAERENIRQGIRDKYGIKKREVAEAEEAAAMEQACEGSMTRPKKAVPSGCGDDDEEENIMDTVMKYLPGPLQDMLKK.	14972.3	No match	48120000
sp|Q6PI52|CALM_DANRE	Calmodulin OS=Danio rerio OX=7955 GN=calm1a PE=2 SV=3	2	78	M.(A)[Acetyl]DQLTEEQIAEFKEAFSLFDKDGDGTITTKELGTVMRSLGQNPTEAELQDMINEVDADGN(GTI)[-223.5714]DFPEFLTMMARKMK.D	8389.44	No match	51550000
tr|Q1L8J0|Q1L8J0_DANRE	Fli-1 proto-oncogene, ETS transcription factor a (Fragment) OS=Danio rerio OX=7955 GN=fli1 PE=4 SV=1	143	212	S.VYNTEVLLSHLNYLRESSSSISYNTPSHADQSPRLAAKDDASYDAVRRTGWSNNMHSGKGSPTVVSQSVS.	7622.69	No match	54270000
sp|Q5BJA5|H2B1_DANRE	Histone H2B 1/2 OS=Danio rerio OX=7955 GN=zgc:112234 PE=2 SV=3	11	124	K.KGSKKAVTKTAGKGGKKRKRTRKESYAIYVYKVLKQVHPDTGISSKAMGIMNSFVNDIFERIAGEASRLAHYNKRSTITSREIQTAVRLLLPGELAKHAVSEGTKAVTKYTSSK.	12549	No match	57130000
tr|A0A140LG23|A0A140LG23_DANRE	Histone H3 OS=Danio rerio OX=7955 GN=hist2h3ca1 PE=3 SV=1	27	136	A.RKSAPATGGVKKPHRYRPGTVALREIRRYQKSTELLIRKLPFQRLVREIAQ(D)[-113.9776]FKTDQRFQSSAVMALQEASEAYLVGLFEDTNLCAIHAKRVTIMPKDIQLARRIRGERA.	12542	No match	58830000
tr|A1A5Y7|A1A5Y7_DANRE	High mobility group nucleosomal-binding domain 7 OS=Danio rerio OX=7955 GN=hmgn7 PE=1 SV=1	24	95	S.AKPTPPKPEPKPKKTPKKDKEVNDKKEDKKAKGKADESKEENQSENGETKTNEVEKTADEAAEGEKDDPKTE.	8000.07	No match	63930000
sp|Q6PI20|H33_DANRE	Histone H3.3 OS=Danio rerio OX=7955 GN=h3f3a PE=2 SV=3	27	136	A.RKSAPSTGGVKKPHRYRPGTVALREIRRYQKSTELLIRKLPFQRLVREIAQDFKTDLRFQSAAIG(A)[-53.9680]LQEASEAYLVGLFEDTNLCAIHAKRVTIMPKDIQLARRIRGERA.	12527	No match	70680000
tr|B0R023|B0R023_DANRE	NEDD8 OS=Danio rerio OX=7955 GN=nedd8l PE=2 SV=1	1	76	.MLIKVKTLTGKEIEIDIEPTDKVERIKERVEEKEGIPPQQQRLIYSGKQMNDEKTAADYKIQGGSVLHLVLALRGG.E	8569.67	No match	75680000
sp|Q6NWH2|MRPB_DANRE	MARCKS-related protein 1-B OS=Danio rerio OX=7955 GN=marcksl1b PE=2 SV=1	116	207	K.KNAEVKEEAAAAAPATEEKPEENGAATEEKKEEEAKAEETPAAPVETPKAEEPAAKAEEPAAAKEEAAAPAVEATKQTEETNSTPAPSEQKE.	9534.59	No match	98310000
tr|A0A2R8RP85|A0A2R8RP85_DANRE	Synuclein, gamma b (breast cancer-specific protein 1) OS=Danio rerio OX=7955 GN=sncgb PE=1 SV=1	1	114	.(M)[Acetyl]DVLMKGFSMAKEGVVAAAEKTKAGVEEAALKTKEGVMYVGNKTKEGMVSGVNTVVQKTTDQANIVGETAVGGANVAGQNTVEGLENVAAS(T)[35.3536]GMVNPGDFSHGGMEGGEGGEGY.	11511.6	No match	111900000
tr|F6NXD5|F6NXD5_DANRE	Myristoylated alanine-rich protein kinase C substrate b OS=Danio rerio OX=7955 GN=marcksb PE=1 SV=1	2	121	M.GAQISKNGAKDETAAEKPAEAANKSNGQENGHAKTN(GNAS)[213.1650]PNAEAAAEDVQANGKHAADGEVKAEEGKAEEADAEKAAPEGEGESSAVANGEDSTKTEESAATSSEPAKTKKRFSFKKPF.K	12379	No match	114400000
tr|Q568R9|Q568R9_DANRE	Gamma1b-synuclein OS=Danio rerio OX=7955 GN=sncga PE=1 SV=1	1	111	.(M)[Acetyl]DALKKGFSIAKEGVVAAAEKTKAGVEEAAAKTKEGVMYVGTKTKEGVATSVNTVAQKTTDQANL(M)[-1.6209]SDTAVAGANEVSEKAVEGLETMVASAGLVKPGVVKHEEQPADAGQ.	11296.8	No match	132900000
tr|F1QUD0|F1QUD0_DANRE	Prothymosin alpha-A OS=Danio rerio OX=7955 GN=ptmaa PE=1 SV=1	2	105	M.(A)[Acetyl]DTKVDTSKEVSAKDLKEKKQVEEAENGKDAPANGNAENEENGDPENEVDEEDDDVAEEDEEDDGEGDDDDEDEEAEGGTGKRAAEDDDDDEDDVDPKKQKTDV.	11366.8	No match	140800000
tr|X1WHN2|X1WHN2_DANRE	Slingshot protein phosphatase 1a OS=Danio rerio OX=7955 GN=ssh1a PE=3 SV=3	572	671	E.GIGAQTCSRGPEPLEELRLRLEFSTVEEEDEEEAQKEQAEMEALTEEAKRVDGKDSEELLNEKGIDLTSVNHLCNENNNNNHLKMQQILTVSILLAHIKY.	11341.5	No match	159400000
tr|A0A2R8Q2J3|A0A2R8Q2J3_DANRE	LEM domain-containing protein OS=Danio rerio OX=7955 GN=emd PE=4 SV=1	2	98	M.(S)[Acetyl]SLSVKSDKEICQLLDEYGIKHGPIVESTRKLYEKKLNEAMAKKTKPSSPDKTYYREEQEEVEYVTYHQGYYVCPAQTMSLSYDYSTRRSKASDSDF.A	11313.6	No match	293100000
tr|A0A2R8QHW0|A0A2R8QHW0_DANRE	Family with sequence similarity 183 member A OS=Danio rerio OX=7955 GN=fam183a PE=4 SV=1	1	144	.KKQKYKNLNMAKLKEKEPLDIVHQNAIHVETIMKELRHQKLYTEFNINPFKKLHVLTDKPMSSIAHKKEEGDPAFLQAVHNAHLEPTKKYTHPQTESQEIGWLSSPLLVTDRSDRRLNFPRQNSEITKYMDAAWRLKEQTQNMR.	17046.7	No match	304400000
tr|B8A519|B8A519_DANRE	Premelanosome protein b (Fragment) OS=Danio rerio OX=7955 GN=pmelb PE=4 SV=1	110	217	R.HFFNDSGTFCINVSMANDVSMAVTNARVNINIGSRLTSAGAAALLLGILTVVSAMAAVAFAYKRLKGYQRLTEDPVACQSNDSGVCSMPALFWSLMNHQTVDQKKGVV.	11493.6	No match	327500000
tr|X1WC76|X1WC76_DANRE	Si:dkey-108k21.24 (Fragment) OS=Danio rerio OX=7955 GN=si:dkey-108k21.24 PE=3 SV=1	1	151	.AHYSSTPRVISCSVIMARTKQTARKSTGGKA(PRKQLATKAARKSAPATGGVKKPHRY)[-11.4143]RPGTVALREIRRYQKSTELLIRKLPFQRLVREIAQDFKTDLRFQSSAVMALQEASEAYLVGLFEDTNLCAIHAKRVTIMPKDIQLARRIRGERA.	16967.7	No match	506400000
tr|E7EY90|E7EY90_DANRE	Musculoskeletal embryonic nuclear protein 1 OS=Danio rerio OX=7955 GN=mustn1b PE=3 SV=2	1	78	.(M)[Acetyl]SQLEVKKKKRPVVKEEDLKGARSK(LGLKGEVKSKT)[-62.2635]YEVMAECERMGKVAPSVFSGVRSGNETVIEKPKPPSGSVFGK.	8496.43	No match	620600000
tr|E7FE66|E7FE66_DANRE	Tau tubulin kinase 2a OS=Danio rerio OX=7955 GN=ttbk2a PE=4 SV=1	603	709	A.DIHMSHTVLSPQRMDRLELSVFPGSGGPPVTPTSPGEALAEGALTQLPTSPASQPEELVARTCSPLHLRSPSPHTLLTTLSDPLHQRAPPGMRRSQSADYQNHPSSY.T	11476.6	No match	1814000000
sp|Q90485|HBB2_DANRE	Hemoglobin subunit beta-2 OS=Danio rerio OX=7955 GN=ba2 PE=1 SV=3	2	123	M.VEWTDAERTAILGLWGKLNIDE(IGPQALSRCLIVYPWTQRYFATFGNLSSPAAIMGNPKVAAHGRTVMGGLERAIKNMDNIKNTYAALSVMHSEKLHVDPDNFKLLADCITVCAAMKFGQAG)[45.0722].F	13374.4	No match	2304000000
tr|A0A2R8RP85|A0A2R8RP85_DANRE	Synuclein, gamma b (breast cancer-specific protein 1) OS=Danio rerio OX=7955 GN=sncgb PE=1 SV=1	1	114	.(M)[Acetyl]DVLMKGFSMAKEGVVAAAEKTKAGVEEAALKTKEGVMYVGNKTKEGMVSGVNTVVQKTTDQANIVGETAVGGANV(AGQNTVEGLENVAASTGMV)[9.7371]NPGDFSHGGMEGGEGGEGY.	11485.9	No match	3066000000
